# Supplementary material
Source: PubMed Central journal article supplement (PMC5195887)

**Supporting Information**  
for  
**Eight-Step Enantioselective Total Synthesis of**  
**(–)-Cycloclavine**

Stephanie R. McCabe and Peter Wipf\*

*Department of Chemistry, University of Pittsburgh, Pittsburgh, PA 15260, U.S.A.*

Table of Contents

|                                                                                                                                                                                     |    |
|-------------------------------------------------------------------------------------------------------------------------------------------------------------------------------------|----|
| General Comments.....                                                                                                                                                               | 2  |
| Perfluorophenyl 2-diazopropanoate ( <b>10</b> ).....                                                                                                                                | 3  |
| Perfluorophenyl ( <i>R</i> )-1-methyl-2-methylenecyclopropane-1-carboxylate ( <b>11</b> ).....                                                                                      | 5  |
| ( <i>R,E</i> )- <i>N</i> ,1-Dimethyl-2-methylene- <i>N</i> -(3-oxobut-1-en-1-yl)cyclopropane-1-carboxamide ( <b>3</b> ) .....                                                       | 6  |
| (1 <i>aR</i> ,3 <i>aS</i> ,7 <i>aS</i> )-1 <i>a</i> ,3-Dimethylhexahydro-2 <i>H</i> -cyclopropa[ <i>c</i> ]indole-2,5(3 <i>H</i> )-dione ( <b>14</b> ) and                          |    |
| (1 <i>aR</i> ,3 <i>aR</i> ,7 <i>aS</i> )-1 <i>a</i> ,3-dimethylhexahydro-2 <i>H</i> -cyclopropa[ <i>c</i> ]indole-2,5(3 <i>H</i> )-dione ( <i>epi</i> - <b>14</b> ) .....           | 7  |
| (1 <i>aR</i> ,3 <i>aS</i> ,7 <i>aR</i> )-1 <i>a</i> ,3-Dimethyl-1,1 <i>a</i> ,3 <i>a</i> ,4-tetrahydro-2 <i>H</i> -cyclopropa[ <i>c</i> ]indole-2,5(3 <i>H</i> )-dione ( <b>2</b> ) | 9  |
| 2,2,6,6-Tetramethylpiperidin-1-ol.....                                                                                                                                              | 11 |
| 2,2,6,6-Tetramethylpiperidin-1-yl furan-2-ylcarbamate ( <b>S2</b> ) .....                                                                                                           | 11 |
| 2,2,6,6-Tetramethylpiperidin-1-yl furan-2-yl((tributylstannyl)methyl)carbamate ( <b>S4</b> ).....                                                                                   | 12 |
| Allylic alcohols <b>16</b> and <i>epi</i> - <b>16</b> .....                                                                                                                         | 13 |
| (–)-Cycloclavine ((–)- <b>1</b> ) .....                                                                                                                                             | 15 |
| Table 1. Optimization of Catalytic Asymmetric Allene Cyclopropanation.....                                                                                                          | 16 |
| Mosher-acid chloride derivatization, representative procedure .....                                                                                                                 | 16 |
| Mosher acid derivative ( <b>S7</b> ).....                                                                                                                                           | 17 |
| X-ray structural information for <b>14</b> .....                                                                                                                                    | 19 |
| X-ray structural information for <b>16</b> .....                                                                                                                                    | 25 |
| References.....                                                                                                                                                                     | 36 |
| NMR spectra .....                                                                                                                                                                   | 37 |

## General Comments

All glassware was dried in an oven at 140 °C for at least 2 h prior to use. All air and moisture-sensitive reactions were performed under a dry N<sub>2</sub> atmosphere. Reactions carried out at 0 °C employed an ice bath and reactions carried out at -78 °C employed a dry ice/ acetone bath. THF and Et<sub>2</sub>O were distilled over sodium/benzophenone ketyl, Et<sub>3</sub>N, CH<sub>2</sub>Cl<sub>2</sub> and toluene were distilled from CaH<sub>2</sub>. All other materials were obtained from commercial sources and used as received. Microwave reactions were performed in a monowave microwave synthesis reactor. Infrared spectra were obtained from neat solids or oils on ATR FT-IR spectrometers. Melting points were determined in open capillary tubes and are uncorrected. High- resolution mass spectra were obtained on a Q-TOF MS or an Thermo Scientific Exactive Orbitrap LC-MS. <sup>1</sup>H spectra were obtained at 300 MHz, 400 MHz, 500, 600 or 700 MHz NMR in CDCl<sub>3</sub> unless otherwise specified. <sup>13</sup>C NMR spectra were obtained at 100, 125, or 150 MHz using a proton-decoupled pulse observed peak. Chemical shifts (δ) are reported in parts per million with the residual solvent peak used as an internal standard δ <sup>1</sup>H/<sup>13</sup>C (Solvent); 7.26/77.16 (CDCl<sub>3</sub>); 7.16/128.06 (C<sub>6</sub>D<sub>6</sub>) and 5.32/54.00 (CD<sub>2</sub>Cl<sub>2</sub>) and are tabulated as follows: chemical shift, multiplicity (s = singlet, d = doublet, t = triplet, q = quartet, m = multiplet), and coupling constant(s), number of protons. Reactions were monitored by thin layer chromatography analysis (pre-coated silica gel 60 F254 plates, 250 μm layer thickness) and visualization was accomplished with a KMnO<sub>4</sub> solution (1.50 g of KMnO<sub>4</sub>, 10 g of K<sub>2</sub>CO<sub>3</sub>, and 1.25 mL of 10% NaOH in 200 mL of H<sub>2</sub>O) when needed. Flash chromatography was performed using SiO<sub>2</sub> (40-63 μm). Optical rotations were measured on a polarimeter equipped with a sodium lamp. Specific rotation values were calculated using the equation:

$$[\alpha]_{\lambda}^T = (100 \cdot \alpha) / (l \cdot c)$$

Where [α] represents the specific rotation of the sample in (10<sup>-1</sup>·deg·cm<sup>2</sup>·g<sup>-1</sup>), *T* indicates ambient temperature in °C, λ indicates wavelength (*D* is used to indicate the sodium line, λ = 589 nm), α indicates the measured optical rotation, *l* indicates the path length in decimeters and *c* indicates the concentration in g/100 mL. Enantiomeric excesses were determined by analytical supercritical fluid chromatography (SFC) using a ChiralPak IC

column.

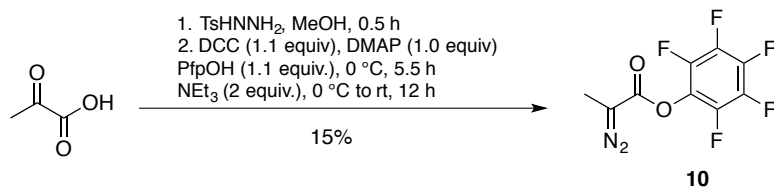

**Perfluorophenyl 2-diazopropanoate (10)**. Prepared using a modified protocol originally reported by Maruoka *et al.*<sup>1</sup> A solution of *p*-toluenesulfonyl hydrazide (10.7 g, 56.2 mmol) in MeOH (30 mL) was treated with pyruvic acid (3.95 mL, 56.2 mmol). The resulting clear and colorless solution was stirred at room temperature for 0.5 h then concentrated to deliver 2-(2-tosylhydrazono)propanoic acid as a white foam which was immediately dissolved in CH<sub>2</sub>Cl<sub>2</sub> (580 mL), cooled to 0 °C and treated sequentially with DCC (13.9 g, 61.8 mmol) and DMAP (6.87 g, 56.2 mmol). The resulting mixture was stirred at 0 °C for 30 min then treated with pentafluorophenol (11.4 g, 61.8 mmol) in CH<sub>2</sub>Cl<sub>2</sub> (5 mL). The reaction was allowed to stir at 0 °C for 5 h then treated with triethylamine (15.9 mL, 112 mmol) and the resulting yellow, heterogenous solution was stirred for 12 h while warming slowly to room temperature. The mixture was filtered through a pad of Florisil washing with CH<sub>2</sub>Cl<sub>2</sub> and the filtrate was carefully concentrated under reduced pressure. The crude residue was purified by chromatography on SiO<sub>2</sub> (0-2% Et<sub>2</sub>O/hexanes) to deliver **10** (2.21 g, 8.29 mmol, 15%) as a yellow oil: IR (ATR) 2940, 2094, 1721, 1655, 1515, 1474, 1338, 1297, 1147, 1055, 992, 713 cm<sup>-1</sup>; <sup>1</sup>H NMR (300 MHz, C<sub>6</sub>D<sub>6</sub>) δ 1.20 (s, 3 H).

An alternate, higher yielding synthesis of perfluorophenyl 2-diazopropanoate (**10**):

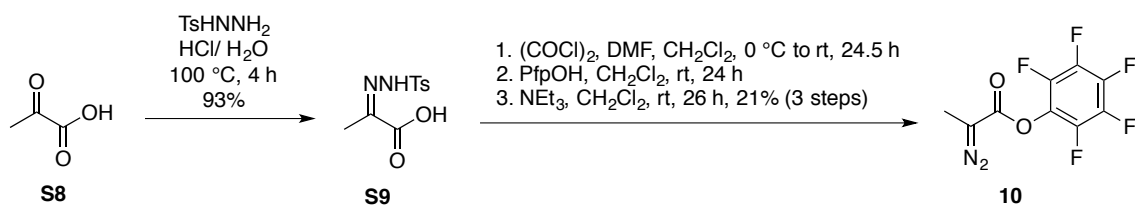

**2-(2-Tosylhydrazono)propanoic acid (S9)**. A solution of *p*-toluenesulfonyl hydrazide (5.00 g, 26.3 mmol) in H<sub>2</sub>O (25 mL) was treated sequentially with 2.5M HCl (12.5 mL)

and pyruvic acid (2.24 mL, 31.6 mmol) and the resulting heterogenous mixture heated at 100 °C for 4 h. The reaction was cooled to room temperature and the white precipitate collected by vacuum filtration, washing with cold H<sub>2</sub>O (3x) and dried under high vacuum to deliver 2-(2-tosylhydrazono)propanoic acid **S9** (6.29 g, 93%) as a white solid. Mp 158.4-159.6 °C; IR (ATR) 3546, 3215, 2930, 1690, 1596, 1340, 1166, 1121, 1083, 907, 786 cm<sup>-1</sup>; <sup>1</sup>H NMR (400 MHz, DMSO-d<sub>6</sub>) δ 12.8 (bs, 1 H), 11.1 (s, 1 H), 7.76 (d, *J* = 8.4 Hz, 2 H), 7.41 (d, *J* = 8.0 Hz, 2 H), 2.38 (s, 3 H), 1.93 (s, 3 H); <sup>13</sup>C NMR (100 MHz, DMSO-d<sub>6</sub>); δ 165.2, 145.3, 143.8, 136.0, 129.7, 127.4, 21.0, 13.1; HRMS (LCMS ESI<sup>+</sup>) *m/z* calcd for C<sub>10</sub>H<sub>13</sub>N<sub>2</sub>O<sub>4</sub>S 257.0591, found 257.0587.

**Perfluorophenyl 2-diazopropanoate (10).** A suspension of 2-(2-tosylhydrazono)propanoic acid **S9** (8.00 g, 31.2 mmol) in CH<sub>2</sub>Cl<sub>2</sub> (336 mL) under an atmosphere of argon (balloon) was cooled to 0 °C and treated sequentially with oxalyl chloride (4.10 mL, 46.8 mmol) and DMF (0.0121 mL, 0.156 mmol) upon the addition of which gas evolution occurred. The resulting suspension was stirred at 0 °C warming to room temperature over 24.5 h during which time the white solid gradually went into solution becoming clear and pale yellow. The reaction was then treated dropwise with a solution of pentafluorophenol (8.62 g, 46.8 mmol) in CH<sub>2</sub>Cl<sub>2</sub> (13 mL) and the resulting clear and pale yellow solution let stir at room temperature for 24 h. The reaction was then treated with NEt<sub>3</sub> (8.87 mL, 62.4 mmol) during the addition of which a white gas evolved and the solution became orange/ yellow in colour. The resulting orange solution was allowed to stir at room temperature for 26 h then filtered through a pad of florisil (washing with CH<sub>2</sub>Cl<sub>2</sub>) and concentrated. The crude oil was purified by chromatography on SiO<sub>2</sub> (0-1% Et<sub>2</sub>O/hexanes) to deliver diazopropanoate **10** (1.76 g, 21%) as a yellow oil. <sup>1</sup>H NMR (300 MHz, C<sub>6</sub>D<sub>6</sub>) δ 1.21 (s, 3 H).

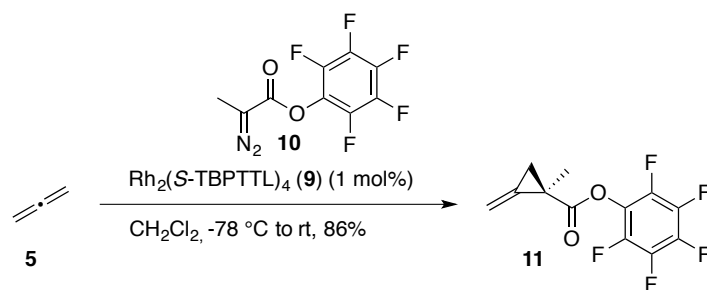

**Perfluorophenyl (*R*)-1-methyl-2-methylenecyclopropane-1-carboxylate (11).** An oven-dried three-neck flask fitted with a nitrogen inlet, a dry-ice condenser, and septum was charged with  $\text{Rh}_2(\text{S-TBPTTL})_4$  (**9**)<sup>2</sup> (0.236 g, 0.0939 mmol) and  $\text{CH}_2\text{Cl}_2$  (51 mL) and the resulting green solution was cooled to  $-78^\circ\text{C}$  and treated dropwise with an excess of condensed allene gas (**5**, 2.23 g, 55.7 mmol). A solution of perfluorophenyl 2-diazopropanoate (**10**, 2.50 g, 9.39 mmol) in anhydrous  $\text{CH}_2\text{Cl}_2$  (9.0 mL) was then added slowly *via* syringe pump at a rate of ca. 1 mL/h, allowing the solution to run down the side of the flask into the reaction mixture. After the addition was complete, the mixture was allowed to stir at  $-78^\circ\text{C}$  for 1 h before warming to room temperature. The solution was concentrated and the resulting green residue was purified by chromatography on  $\text{SiO}_2$  (gradient elution 0-1%  $\text{Et}_2\text{O}$ /hexanes) to deliver methylenecyclopropane **11** (2.24 g, 8.05 mmol, 86%) as a clear and pale yellow oil:  $[\alpha]_{\text{D}}^{18} -2.9$  ( $c$  5.1,  $\text{CHCl}_3$ ); IR (ATR) 2985, 2939, 1770, 1655, 1517, 1459, 1283, 1070, 1028, 993  $\text{cm}^{-1}$ ;  $^1\text{H}$  NMR (400 MHz,  $\text{CD}_2\text{Cl}_2$ )  $\delta$  5.64 (t,  $J = 2.8$  Hz, 1 H), 5.56 (t,  $J = 2.2$  Hz, 1 H), 2.30 (dt,  $J = 9.2, 2.5$  Hz, 1 H), 1.63 (dt,  $J = 9.2, 2.4$  Hz, 1 H), 1.51 (s, 3 H);  $^{13}\text{C}$  NMR (100 MHz,  $\text{CD}_2\text{Cl}_2$ )  $\delta$  170.4, 143.2-143.0 (m), 141.3-141.0 (m), 140.7-140.5 (m), 139.9-139.5 (m), 137.4-137.0 (m), 136.8, 126.2-125.8 (m), 104.5, 23.2, 20.6, 18.8; DEPT-135 (100 MHz,  $\text{CD}_2\text{Cl}_2$ )  $\delta$  104.5 ( $\text{CH}_2$ ), 20.6 ( $\text{CH}_2$ ), 18.8 ( $\text{CH}_3$ );  $^{19}\text{F}$  NMR (471 MHz,  $\text{CD}_2\text{Cl}_2$ )  $\delta$  -153.9 (m, 2 F), -59.4 (t,  $J_{\text{F}} = 21.2$  Hz, 1 F), -163.5 to -163.6 (m, 2 F); HRMS (APCI+)  $m/z$  calcd for  $\text{C}_{12}\text{H}_8\text{O}_2\text{F}_5$  (M+H) 279.04390, found 279.04312.

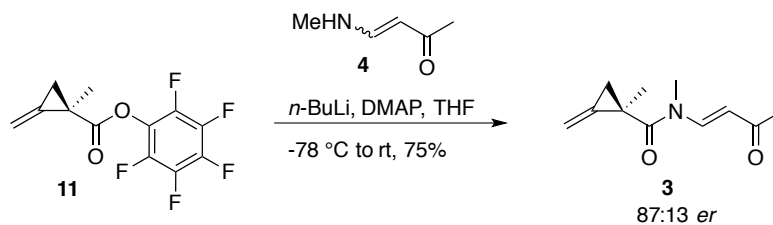

**(*R,E*)-*N*,1-Dimethyl-2-methylene-*N*-(3-oxobut-1-en-1-yl)cyclopropane-1-**

**carboxamide (3).** An oven-dried flask charged with vinylogous amide **4**<sup>3</sup> (0.700 g, 7.06 mmol) was evacuated and backfilled with nitrogen (3x). Freshly distilled THF (24 mL) was added and the resulting solution was cooled to -78 °C and treated dropwise with *n*-BuLi (3.24 mL, 2.29 M solution in hexanes, 7.42 mmol). The resulting clear, pale yellow solution was stirred for 5 min at -78 °C, then treated with a solution of ester **11** (2.06 g, 7.41 mmol) in THF (4 mL). The resulting bright yellow solution was treated with DMAP (0.0862 g, 0.706 mmol) and stirred for 10 min at -78 °C. The cold bath was removed and the reaction mixture was allowed to stir, warming to room temperature. The reaction was quenched with sat. NaHCO<sub>3</sub>. After addition of EtOAc, the aqueous layer was extracted with EtOAc (3x) and the combined organic layers were dried (Na<sub>2</sub>SO<sub>4</sub>) and concentrated. The crude product was purified by chromatography on SiO<sub>2</sub> (10-15% EtOAc/hexanes) to deliver **3** (1.03 g, 5.32 mmol, 75%) as a clear, pale yellow oil:  $[\alpha]_{\text{D}}^{18} +251.5$  (*c* 2.2, CHCl<sub>3</sub>); IR (ATR) 2968, 2932, 1680, 1615, 1578, 1516, 1355, 1262, 1247, 1072, 968 cm<sup>-1</sup>; <sup>1</sup>H NMR (400 MHz, CDCl<sub>3</sub>)  $\delta$  8.36 (d, *J* = 13.6 Hz, 1 H), 5.73-5.69 (m, 2 H), 5.53 (ap. s, 1 H), 3.15 (s, 3 H), 2.29 (s, 3 H), 1.79 (dt, *J* = 9.6, 2.2 Hz, 1 H), 1.49 (s, 3 H), 1.32 (dt, *J* = 9.6, 2.2 Hz, 1 H); <sup>13</sup>C NMR (125 MHz, CDCl<sub>3</sub>)  $\delta$  196.9, 172.4, 142.9, 134.9, 108.4, 104.9, 30.9, 28.9, 24.9, 21.8, 15.9; HRMS (ESI)<sup>+</sup> *m/z* calcd for C<sub>11</sub>H<sub>16</sub>O<sub>2</sub>N (M+H) 194.1176, found 194.1174.

SFC conditions: Chiralpak-IC column (250 x 4.6 mm), gradient elution: 1% *i*PrOH (hold for 5 min), 2% *i*PrOH (hold for 5 min), 3% *i*PrOH (hold for 6 min), 4% *i*PrOH (hold for 3 min), 4.50% *i*PrOH (hold for 2 min), 5% *i*PrOH (hold for 3 min), 4 mL/min, 254 nM, P=110 (BAR).

Racemic standard:

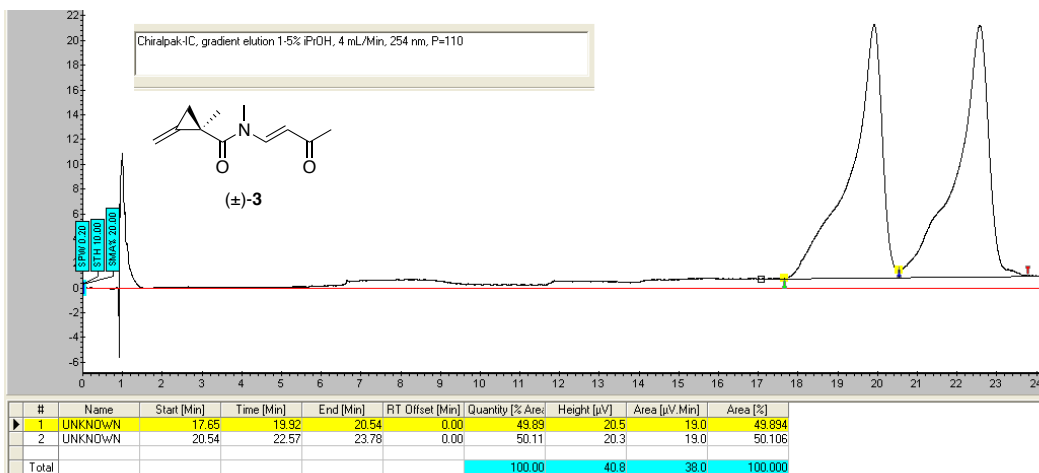

Enantiomeric excess of vinylogous amide **3**:

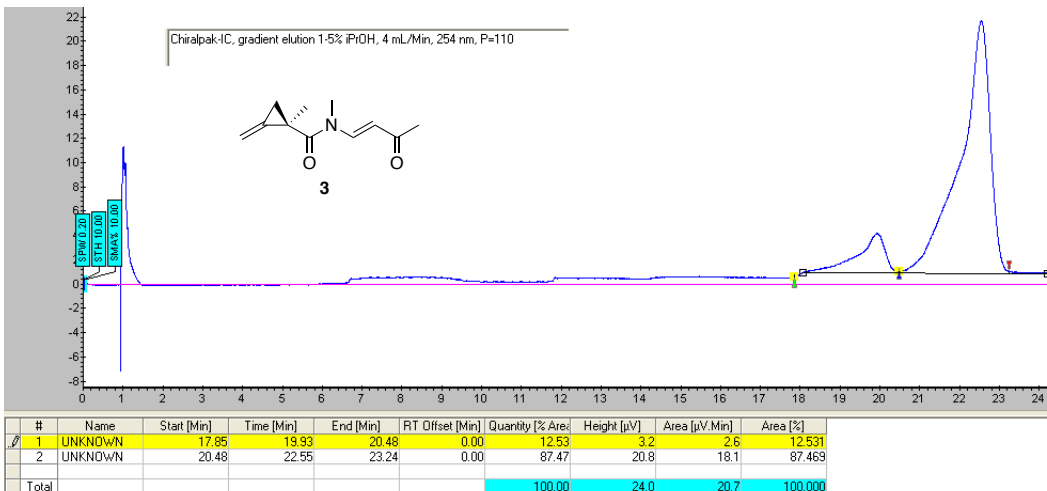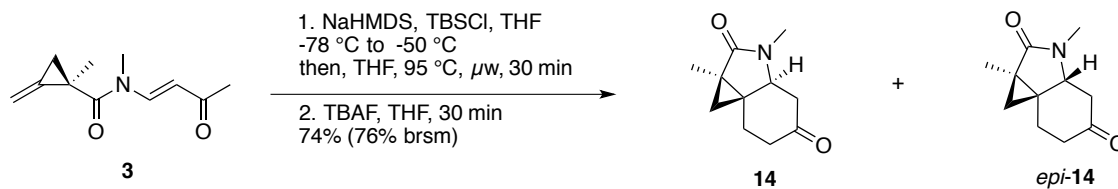

**(1*a*R,3*a*S,7*a*S)-1*a*,3-Dimethylhexahydro-2*H*-cyclopropa[*c*]indole-2,5(3*H*)-dione (14)** and **(1*a*R,3*a*R,7*a*S)-1*a*,3-dimethylhexahydro-2*H*-cyclopropa[*c*]indole-2,5(3*H*)-dione (*epi-14*)**. An oven-dried flask was charged with NaHMDS (0.611 g, 3.17 mmol) followed by anhydrous THF (31.5 mL) under an atmosphere of nitrogen. The resulting clear,

colourless solution was stirred for 15 min at room temperature, cooled to  $-78\text{ }^{\circ}\text{C}$  and stirred for a further 15 min prior to treatment with a solution of vinylogous amide **3** (0.556 g, 2.88 mmol) in THF (6.0 mL) that was added slowly via syringe pump at a rate of ca. 2 mL/h. During the slow addition of the amide, the solution changes color from clear pale yellow, to clear and gold to clear and deep orange. The resulting clear, orange solution was allowed to stir for 1 h while warming to  $-50\text{ }^{\circ}\text{C}$ , cooled to  $-78\text{ }^{\circ}\text{C}$  and treated dropwise with a solution of TBSCl (0.526 g, 3.45 mmol) in THF (11.5 mL) over a period of 5 min. The solution was allowed to stir for 5 min at  $-78\text{ }^{\circ}\text{C}$  before the cold bath was removed and the solution allowed to reach room temperature.  $^1\text{H}$  NMR analysis of an aliquot ( $\text{CDCl}_3$ ) indicated formation of the desired TBS enol ether. The reaction mixture was concentrated under reduced pressure to obtain crude enol ether **12** as an orange gel, which was immediately taken up in THF (8.4 mL) and heated under microwave irradiation in a sealed vial at  $95\text{ }^{\circ}\text{C}$  for 30 min (3 x 2.8 mL batches). The combined batches were concentrated to deliver a mixture of crude enol ethers, which were taken up in THF (29 mL), treated dropwise with TBAF (2.88 mL, 1 M solution in THF, 2.88 mmol) and allowed to stir at room temperature for 30 min. The reaction mixture was filtered through a pad of Celite and concentrated. The resulting residue was purified by chromatography on  $\text{SiO}_2$  (gradient elution: 20% EtOAc/hexanes to elute recovered vinylogous amide **3**, then 50-70% EtOAc/hexanes to elute ketone **14** and then 90-100% EtOAc/hexanes to elute *epi*-**14**) to deliver recovered vinylogous amide **3** (0.0153 g) as a yellow oil along with *trans*-ketone **14** (0.339 g, 1.75 mmol, 61%, (63% brsm)) as a yellow crystalline solid and *cis*-ketone *epi*-**14** (0.0711 g, 0.368 mmol, 13% (13% brsm)) as a yellow oil.

***trans*-Ketone 14:**  $[\alpha]_{\text{D}}^{19} +97.1$  ( $c$  0.17,  $\text{CHCl}_3$ ); Mp  $95.5\text{-}98.4\text{ }^{\circ}\text{C}$ ; IR (ATR) 2955, 1706, 1676, 1414, 1395, 1359, 1292, 1230, 1123, 1072, 1042,  $865\text{ cm}^{-1}$ ;  $^1\text{H}$  NMR (300 MHz,  $\text{CDCl}_3$ )  $\delta$  3.40 (dd,  $J = 13.1, 4.1\text{ Hz}$ , 1 H), 2.80 (ddd,  $J = 13.5, 4.1, 1.4\text{ Hz}$ , 1 H), 2.72-2.66 (m, 4 H), 2.53 (ddd,  $J = 15.4, 12.1, 7.3\text{ Hz}$ , 1 H), 2.35 (ap. t,  $J = 13.4\text{ Hz}$ , 1 H), 2.18-2.08 (m, 1 H), 1.72 (ddd,  $J = 13.2, 7.2, 1.8\text{ Hz}$ , 1 H), 1.38 (s, 3 H), 0.95 (d,  $J = 3.6\text{ Hz}$ , 1 H), 0.66 (d,  $J = 3.9\text{ Hz}$ , 1 H);  $^{13}\text{C}$  NMR (100 MHz,  $\text{CDCl}_3$ ):  $\delta$  207.6, 178.9, 60.1, 45.1, 41.5, 31.8, 30.7, 27.2, 25.8, 22.7, 11.0; HRMS (LCMS-ESI)  $m/z$  calcd for  $\text{C}_{11}\text{H}_{16}\text{O}_2\text{N}$  (M+H) 194.1176, found 194.1175.



A single X-ray crystal was obtained for racemic ( $\pm$ )-**14**. Ketone ( $\pm$ )-**14** was obtained as an oil which solidified at  $-20\text{ }^{\circ}\text{C}$  to provide crystals of sufficient quality for X-ray analysis. The X-ray structure of **14** (CCDC 1499046) has been deposited with the Cambridge Crystallographic Data Centre (<http://www.ccdc.cam.ac.uk/>).

**cis-Ketone epi-14**:  $[\alpha]_{\text{D}}^{18} -9.1$  ( $c$  1,  $\text{CHCl}_3$ );  $^1\text{H NMR}$  (300 MHz;  $\text{CDCl}_3$ )  $\delta$  3.73 (ap. t,  $J = 6.6$  Hz, 1 H), 2.83 (dd,  $J = 15.0, 6.3$  Hz, 1 H), 2.72 (s, 3 H), 2.55-2.25 (m, 4 H), 1.82 (dt,  $J = 13.8, 5.1$  Hz, 1 H), 1.34 (s, 3 H), 0.92 (d,  $J = 4.5$  Hz, 1 H), 0.84 (d,  $J = 4.5$  Hz, 1 H). The experimental  $^1\text{H NMR}$  was identical to the literature-reported spectral data.<sup>4</sup>

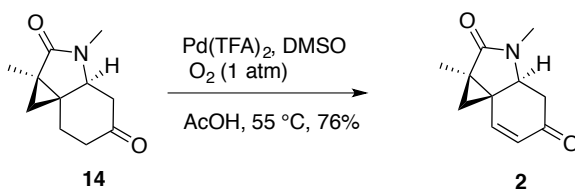

**(1aR,3aS,7aR)-1a,3-Dimethyl-1,1a,3a,4-tetrahydro-2H-cyclopropa[c]indole-2,5(3H)-dione (2)**. A solution of  $\text{Pd}(\text{TFA})_2$  (0.00940 g, 0.0274 mmol) and DMSO (3.90  $\mu\text{L}$ , 0.0549 mmol) in AcOH (2.74 mL) was heated at  $55\text{ }^{\circ}\text{C}$  under an atmosphere of  $\text{O}_2$  (balloon) to pre-activate the catalyst system. After 19.5 h, ketone **14** (0.106 g, 0.549 mmol) was added and the reaction was allowed to stir at  $55\text{ }^{\circ}\text{C}$  under an atmosphere of  $\text{O}_2$  (balloon). Additional  $\text{Pd}(\text{TFA})_2$  was added at 48 h (4.7 mg) and 72 h (4.7 mg) after the addition of the ketone in order to drive the reaction to completion. After 5 d,  $^1\text{H NMR}$  of an aliquot ( $\text{CDCl}_3$ ) showed that the conversion was complete and the reaction mixture was concentrated and purified by chromatography on  $\text{SiO}_2$  (3-5% acetone/ $\text{CH}_2\text{Cl}_2$ ) to deliver enone **2** (0.0796 g, 0.416 mmol, 76%) as a cream crystalline solid. Protocol for the enantiomeric enrichment by recrystallization: Enone **2** (0.0610 g, 0.319 mmol) was dissolved in a 15:1 mixture of boiling MTBE: 1,2-dichloroethane ( $c$  0.08 M) and allowed to cool to room temperature prior to the addition of a seed crystal. The resulting solution was allowed to stand overnight at  $-20\text{ }^{\circ}\text{C}$  during which time white needle-shaped crystals formed. The mother liquor was removed via pipette transfer and the crystals were washed with MTBE (2x) and placed under vacuum to remove trace solvents. The first recrystallization provided crystals of 100% *ee*, the second recrystallization provided

crystals of >99% *ee* and the third recrystallization provided crystals of 92% *ee*. Three rounds of recrystallization delivered enone **2** (29.7 mg, 56% of theoretical maximum yield) as white, needle-shaped crystals. Only samples with *ee* >96% were carried on in the subsequent reaction. The *ee* of the combined material was >99% *ee* by SFC analysis:  $[\alpha]_D^{16}$  -110.1 (*c* 1.1, CHCl<sub>3</sub>); Mp 131.7-134.1 °C; IR (ATR) 2966, 2929, 1683, 1664, 1618, 1585, 1452, 1389, 1235, 1071, 796 cm<sup>-1</sup>; <sup>1</sup>H NMR (500 MHz, CDCl<sub>3</sub>) δ 6.97 (d, *J* = 9.5 Hz, 1 H), 6.14 (d, *J* = 9.5 Hz, 1 H), 3.81 (dd, *J* = 13.8, 3.8 Hz, 1 H), 2.90 (dd, *J* = 15.5, 4.0 Hz, 1 H), 2.71 (s, 3 H), 2.44 (dd, *J* = 15.8, 14.3 Hz, 1 H), 1.46 (s, 3 H), 1.33 (d, *J* = 4.0 Hz, 1 H), 0.86 (d, *J* = 4.0 Hz, 1 H); <sup>13</sup>C NMR (125 MHz, CDCl<sub>3</sub>) δ 197.0, 177.8, 148.4, 131.4, 58.6, 41.9, 32.9, 32.1, 27.3, 23.5, 10.9; HRMS (ESI)<sup>+</sup> *m/z* calcd for C<sub>11</sub>H<sub>14</sub>O<sub>2</sub>N (M+H) 192.1019, found 192.1017. SFC analysis: Chiralpak-IC semiprep column (250 x 10 mm), gradient elution: 1-30% *i*PrOH (rate 1.0), 5.5 mL/min, 254 nM, P=100 (BAR).

Racemic standard:

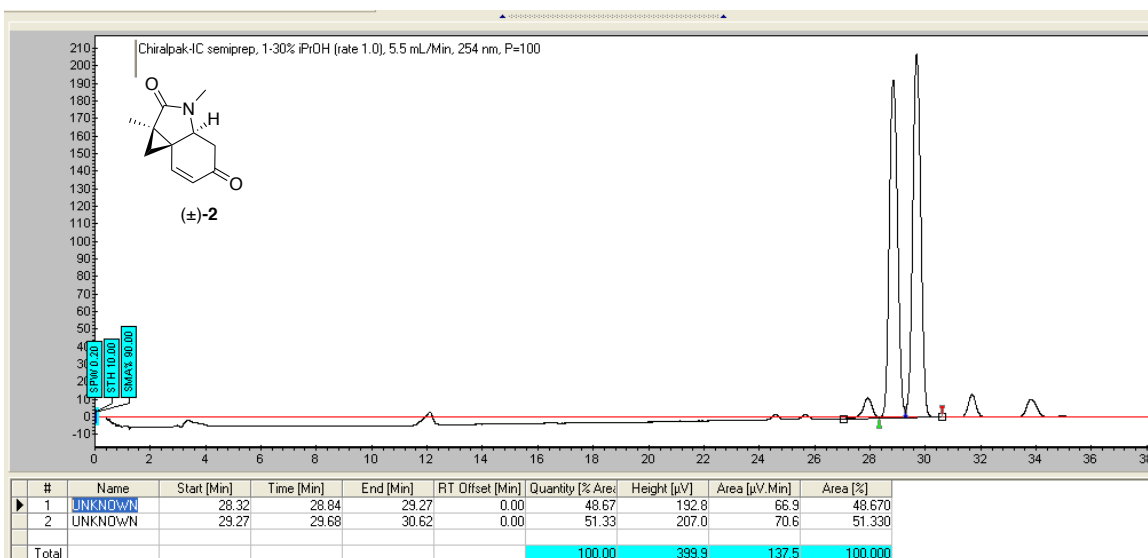

Enantiomeric excess of enantioenriched enone **2** after recrystallization:

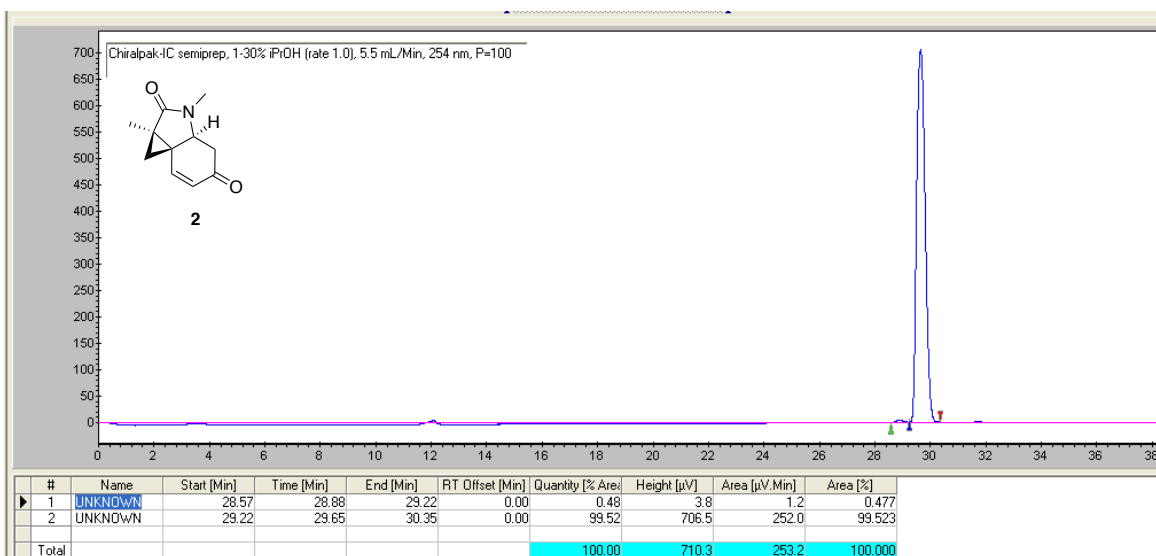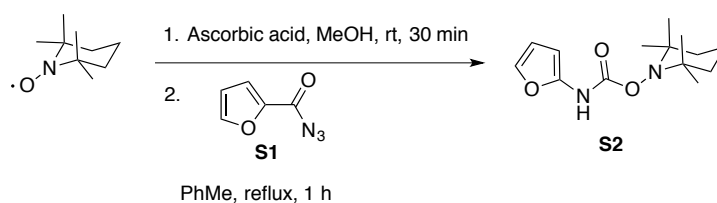

**2,2,6,6-Tetramethylpiperidin-1-ol.** A solution of TEMPO (2.00 g, 96% pure, 12.3 mmol) in deoxygenated MeOH (104 mL) was treated with ascorbic acid (2.60 g, 14.8 mmol) upon the addition of which the solution immediately changed colour from clear and orange to a clear pale yellow solution. The solution was allowed to stir for 30 min, then concentrated under reduced pressure. The resulting residue was diluted with deoxygenated Et<sub>2</sub>O (60 mL) and water (60 mL) and transferred to a separatory funnel. The aqueous phase was further extracted with deoxygenated Et<sub>2</sub>O (4 x 30 mL) and the combined organic layers were dried (MgSO<sub>4</sub>) under nitrogen, filtered and concentrated to deliver crude 2,2,6,6-tetramethylpiperidin-1-ol (1.55 g, 80% crude yield), which was carried on without further purification.

**2,2,6,6-Tetramethylpiperidin-1-yl furan-2-ylcarbamate (S2).** A solution of acyl azide **S1**<sup>5</sup> (0.800 g, 5.84 mmol) in PhMe (45 mL) was heated at reflux for 1 h then cooled to room temperature. IR analysis of the reaction mixture indicated isocyanate formation ( $\nu_{\text{NCO}}$  2265 cm<sup>-1</sup>). The reaction mixture was then treated with a solution of 2,2,6,6-tetramethylpiperidin-1-ol (1.55 g, 9.86 mmol) in PhMe (12 mL). The resulting

orange/brown solution was stirred for 1 h and concentrated. The residue was purified by chromatography on SiO<sub>2</sub> (0-4% EtOAc/hexanes) to deliver TEMPO-carbamate **S2** (1.35 g, 5.08 mmol, 87%) as a white solid: Mp 101.4-102.8 °C; IR (ATR) 3256, 2936, 2924, 2921, 1715, 1620, 1506, 1439, 1379, 1251, 1154, 1010, 719 cm<sup>-1</sup>; <sup>1</sup>H NMR (500 MHz, CDCl<sub>3</sub>) δ 9.00 (bs, 1 H), 7.10 (d, *J* = 1.0 Hz, 1 H), 6.38 (dd, *J* = 3.3, 2.3 Hz, 1 H), 6.17 (d, *J* = 3.0 Hz, 1 H), 1.71-1.55 (m, 5 H), 1.48-1.44 (m, 1 H), 1.26 (s, 6 H), 1.19 (s, 6 H); <sup>13</sup>C NMR (125 MHz, CDCl<sub>3</sub>) δ 154.6, 144.9, 136.4, 111.7, 95.6, 61.5, 39.9, 31.7, 20.9, 16.9; HRMS (ESI+) *m/z* calcd for C<sub>14</sub>H<sub>23</sub>O<sub>3</sub>N<sub>2</sub> (M+H) 267.17032, found 267.17137.

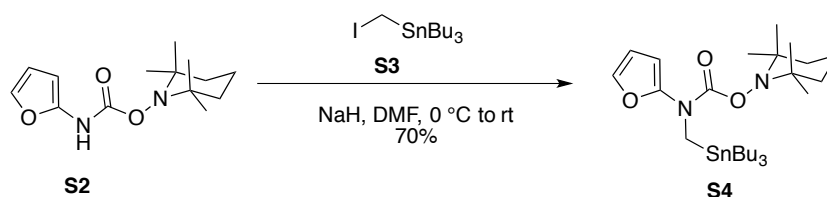

**2,2,6,6-Tetramethylpiperidin-1-yl furan-2-yl((tributylstannyl)methyl)carbamate (S4).** A solution of furan **S2** (0.150 g, 0.563 mmol) in DMF (0.9 mL) was cooled to 0 °C and treated with NaH (0.0270 g, 60% dispersion in mineral oil, 0.675 mmol). The resulting solution was stirred at 0 °C for 0.5 h then treated with (iodomethyl)tributyltin **S3**<sup>6</sup> (0.255 g, 0.591 mmol). The resulting brown solution was stirred for 1 h while warming to room temperature, diluted with Et<sub>2</sub>O and quenched with sat. NH<sub>4</sub>Cl<sub>(aq)</sub>. The aqueous layer was extracted with Et<sub>2</sub>O (2x) and the combined organic layers were dried (Na<sub>2</sub>SO<sub>4</sub>) and concentrated. The resulting residue was purified by chromatography on SiO<sub>2</sub> (gradient elution 0-3% EtOAc/hexanes) to deliver stannane **S4** (0.223 g, 0.392 mmol, 70%) as a clear, pale yellow oil: IR (ATR) 2947, 2926, 2926, 2869, 1728, 1609, 1502, 1430, 1377, 1349, 1185, 1072, 986 cm<sup>-1</sup>; <sup>1</sup>H NMR (400 MHz, C<sub>6</sub>D<sub>6</sub>) δ 6.90 (dd, *J* = 2.0, 0.80 Hz, 1 H), 6.05 (dd, *J* = 3.2, 2.0 Hz, 1 H), 5.93 (bs, 1 H), 3.35 (s, 2 H, <sup>2</sup>*J*<sup>117/119</sup>Sn-<sup>1</sup>H = 27.6 Hz), 1.69-1.54 (m, 9 H), 1.44-1.35 (m, 7 H), 1.33 (s, 6 H), 1.27-1.23 (m, 2 H), 1.09-1.05 (m, 6 H), 0.97-0.94 (m, 15 H); <sup>13</sup>C NMR (100 MHz, C<sub>6</sub>D<sub>6</sub>) δ 157.2, 151.1, 138.8, 111.3, 101.5, 60.4, 39.4, 36.7, 32.0, 29.6 (*J*<sup>117/119</sup>Sn-<sup>13</sup>C = 20 Hz), 27.9 (*J*<sup>117/119</sup>Sn-<sup>13</sup>C = 57 Hz), 20.6, 17.2, 14.0, 11.0 (<sup>1</sup>*J*<sup>119</sup>Sn-<sup>13</sup>C = 334 Hz, <sup>1</sup>*J*<sup>117</sup>Sn-<sup>13</sup>C = 319 Hz); HRMS (ESI+) *m/z* calcd for C<sub>27</sub>H<sub>51</sub>O<sub>3</sub>N<sub>2</sub>Sn (M+H) 571.29162, found 571.28963.

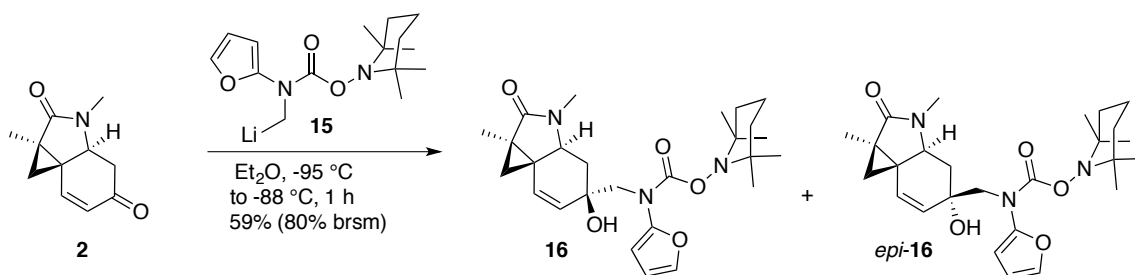

**Allylic alcohols 16 and epi-16.** An oven-dried 2-neck flask equipped with a septum fitted with a nitrogen inlet and a stopper was charged with stannane **S4** (0.107 g, 0.188 mmol) and evacuated under high vacuum, then backfilled with nitrogen (3x). The stopper was exchanged for a thermocouple thermometer under a positive flow of nitrogen, and anhydrous Et<sub>2</sub>O (0.60 mL) was added. The clear, colorless solution was cooled to -74 °C (Et<sub>2</sub>O/dry ice), stirred for 10 min, then treated dropwise with *n*-BuLi (0.0753 mL, 2.5 M solution in hexanes, 0.188 mmol) during the slow addition of which the temperature increased to -71.4 °C. The resulting clear and colourless solution was stirred at -73 °C for 15 min then cooled to -94 °C (N<sub>2(l)</sub>/ Et<sub>2</sub>O) over a period of 10 min and treated dropwise with a solution of enone **2** (0.0300 g, 0.157 mmol) in THF/Et<sub>2</sub>O (1:1 , 600 μL). During this addition the temperature rose to -88 °C and the solution became clear yellow. The mixture was stirred for 1 h while the internal temperature was kept between -89 to -95 °C. The solution was then allowed to warm slowly to -75 °C over 20 min, diluted with EtOAc (0.50 mL) and quenched with sat. NH<sub>4</sub>Cl<sub>(aq)</sub> (1.0 mL), keeping the internal temperature below -50 °C. The cold bath was removed and the reaction mixture was warmed to room temperature. The aqueous layer was extracted with EtOAc (3x). The combined organic layers were dried (Na<sub>2</sub>SO<sub>4</sub>) and concentrated. The resulting residue was purified by chromatography on SiO<sub>2</sub> (5-10% acetone/CH<sub>2</sub>Cl<sub>2</sub>) to deliver recovered starting material **2** (7.8 mg) as a white solid along with allylic alcohols **16** (0.0260 g, 0.0551 mmol, 35% (48% brsm)) and *epi-16* (0.0176 g, 0.0373 mmol, 24% (32% brsm)) as a white foams.

**Allylic alcohol 16:**  $[\alpha]_D^{17}$  -26.1 (*c* 1.1, CHCl<sub>3</sub>); IR (ATR) 3415, 2932, 1736, 1676, 1614, 1504, 1380, 1365, 1287, 1124, 915, 730 cm<sup>-1</sup>; <sup>1</sup>H NMR (400 MHz, C<sub>6</sub>D<sub>6</sub>) δ 6.81 (dd, *J* = 2.0, 0.8 Hz, 1 H), 5.99 (dd, *J* = 3.2, 2.4 Hz, 1 H), 5.90 (dd, 3.2, 0.8 Hz, 1 H), 5.43 (dd, *J* = 9.8, 0.6 Hz, 1 H), 5.36 (d, *J* = 9.6 Hz, 1 H), 3.76 (d, *J* = 14.8 Hz, 1 H), 3.54 (d, *J* = 14.0 Hz, 1 H), 3.37 (s, 1 H), 2.98 (dd, *J* = 13.2, 2.4 Hz, 1 H), 2.54 (s, 3 H), 2.42

(dd,  $J = 12.0, 0.8$  Hz, 1 H), 1.68 (ap. t,  $J = 12.2$  Hz, 1 H), 1.58-1.55 (m, 2 H), 1.31 (s, 3 H), 1.27-1.23 (m, 9 H), 1.08-1.05 (m, 1 H), 0.93 (s, 3 H), 0.92 (s, 3 H), 0.75 (d,  $J = 3.6$  Hz, 1 H), 0.23 (d,  $J = 3.6$  Hz, 1 H);  $^{13}\text{C}$ NMR (100 MHz,  $\text{CDCl}_3$ )  $\delta$  179.2, 159.0, 148.9, 139.5, 132.3, 128.8, 111.5, 103.1, 75.1, 60.9, 60.8, 59.5, 58.2, 39.1 (2C), 35.8, 32.4, 32.1, 31.9, 31.7, 27.2, 24.6, 20.5 (2C), 16.9, 10.8; HRMS (LCMS ESI+)  $m/z$  calcd for  $\text{C}_{26}\text{H}_{38}\text{O}_5\text{N}_3$  (M+H) 472.2806, found 472.2807.

The relative configuration of allylic alcohol **16** was established through a combination of X-ray and  $^1\text{H}$  NMR data (see SI figures 7-10). An X-ray crystal structure of ( $\pm$ )-**16** confirmed the assigned relative configuration. Crystals were grown by slow evaporation at room temperature from a mixture of  $\text{Et}_2\text{O}$ /hexanes (1:1): Mp 91.4-94.3 °C. The X-ray structure of **16** (CCDC 1499047) has been deposited with the Cambridge Crystallographic Data Centre (<http://www.ccdc.cam.ac.uk/>).

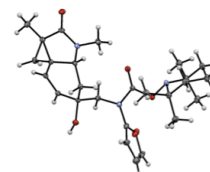

**Allylic alcohol *epi*-16:**  $[\alpha]_{\text{D}}^{17} -3.8$  ( $c$  1.0,  $\text{CHCl}_3$ ); IR (ATR) 3413, 2932, 1744, 1677, 1611, 1504, 1451, 1381, 1364, 1287, 1177, 924, 736  $\text{cm}^{-1}$ ;  $^1\text{H}$  NMR (400 MHz,  $\text{C}_6\text{D}_6$ )  $\delta$  6.86 (dd,  $J = 2.0, 0.8$  Hz, 1 H), 6.03 (dd,  $J = 3.2, 2.0$  Hz, 1 H), 5.87 (dd,  $J = 3.2, 0.8$  Hz, 1 H), 5.66 (dd,  $J = 9.8, 0.6$  Hz, 1 H), 5.48 (d,  $J = 10.0$  Hz, 1 H), 3.84, 3.80 (ABq,  $J = 14.4$  Hz, 2 H), 3.53 (dd,  $J = 12.6, 2.6$  Hz, 1 H), 3.48 (bs, 1 H), 2.47 (s, 3 H), 2.12 (ddd,  $J = 12.0, 2.8, 1.2$  Hz, 1 H), 1.66-1.55 (m, 3 H), 1.33-1.28 (m, 12 H), 1.13-1.07 (m, 1 H), 0.93 (ap. s, 6 H), 0.78 (d,  $J = 3.6$  Hz, 1 H), 0.25 (d,  $J = 3.6$  Hz, 1 H);  $^{13}\text{C}$  NMR (150 MHz,  $\text{CDCl}_3$ )  $\delta$  179.5, 158.8, 148.7, 139.6, 131.0, 129.6, 111.4, 103.4, 74.0, 61.0, 60.9, 60.8, 57.1, 39.1 (2 C), 37.2, 32.3, 31.9, 31.8, 31.7, 27.2, 23.6, 20.5 (2 C), 17.0, 10.8; HRMS (LCMS ESI+)  $m/z$  calcd for  $\text{C}_{26}\text{H}_{38}\text{O}_5\text{N}_3$  (M+H) 472.2806, found 472.2803.

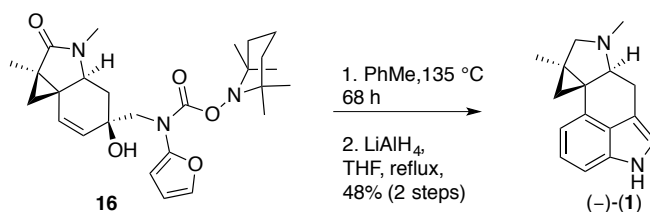

**(-)-Cycloclavine ((-)-(1)).** A solution of tertiary alcohol **16** (0.0140 g, 0.0297 mmol) in dry degassed PhMe (2.0 mL) was heated at 135 °C in a sealed tube for 68 h. The reaction mixture was filtered through a pad of SiO<sub>2</sub> washing with EtOAc and concentrated. The crude indole was dissolved in anhydrous THF (0.4 mL), treated with LiAlH<sub>4</sub> (0.24 mL, 1.0 M solution in Et<sub>2</sub>O, 0.240 mmol) and stirred at reflux (66 °C) in a sealed tube overnight. The reaction mixture was cooled to 0 °C and diluted with Et<sub>2</sub>O (1 mL), then treated successively with H<sub>2</sub>O (9 μL), 15% NaOH (9 μL) and H<sub>2</sub>O (27 μL). The suspension was stirred for 15 min while warming to room temperature, then treated with MgSO<sub>4</sub> and stirred for a further 15 min. The mixture was filtered through a pad of Celite and concentrated. The crude product was purified by chromatography on SiO<sub>2</sub> (20% acetone/ CHCl<sub>3</sub>) to deliver (-)-(1) (0.0034 g, 0.0143 mmol, 48%, 2 steps) as a white solid:  $[\alpha]_D^{20}$  -58.9 (*c* 0.23, CHCl<sub>3</sub>); IR (ATR) 3413, 2930, 2879, 1591, 1443 1322, 1165, 1093, 738 cm<sup>-1</sup>; <sup>1</sup>H NMR (400 MHz, CDCl<sub>3</sub>) δ 7.90 (bs, 1 H), 7.14 (dd, *J* = 8.0, 0.8 Hz, 1 H), 7.09 (dd, *J* = 8.0, 6.8 Hz, 1 H), 6.90 (ap. t, *J* = 1.6 Hz, 1 H), 6.82 (dd, *J* = 6.8, 0.4 Hz, 1 H), 3.17-3.11 (m, 2 H), 2.78 (dd, *J* = 11.6, 4.0 Hz, 1 H), 2.63-2.57 (m, 1 H), 2.40 (d, *J* = 8.4 Hz, 1 H), 2.36 (s, 3 H), 1.69 (s, 3 H), 1.60 (d, *J* = 3.6 Hz, 1 H), 0.45 (d, *J* = 3.6 Hz, 1 H); <sup>13</sup>C NMR (100 MHz, CDCl<sub>3</sub>) δ 135.6, 133.7, 128.8, 123.1, 118.2, 113.5, 110.5, 108.1, 69.8, 65.8, 40.1, 34.5, 27.9, 25.1, 24.4, 16.6; HRMS (LCMS ESI+) *m/z* calcd for C<sub>16</sub>H<sub>19</sub>N<sub>2</sub> (M+H) 239.1543, found 239.1541.

**Table S1. Table 1. Optimization of Catalytic Allene Cyclopropanation.**

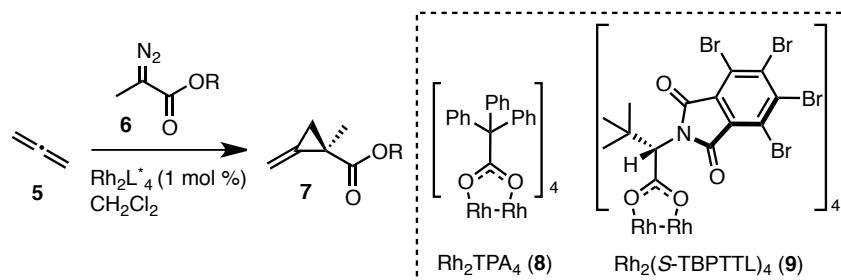

| Entry | R                  | Catalyst | T (°C)     | Yield (%)                             | <i>er</i>              |
|-------|--------------------|----------|------------|---------------------------------------|------------------------|
| 1     | Et                 | <b>8</b> | -78        | 88                                    | 50:50 <sup>[a]</sup>   |
| 2     | <i>t</i> -Bu       | <b>9</b> | -78        | 51                                    | 91:9 <sup>[a]</sup>    |
| 3     | <i>t</i> -Bu       | <b>9</b> | -98 to -80 | 47                                    | 93:7 <sup>[a]</sup>    |
| 4     | Su <sup>[b]</sup>  | <b>9</b> | -78 to rt  | 27                                    | 77:23 <sup>[a]</sup>   |
| 5     | Pcp <sup>[c]</sup> | <b>9</b> | -78        | 74 <sup>[f]</sup> (84) <sup>[g]</sup> | 77:23 <sup>[a,e]</sup> |
| 6     | Pfp <sup>[d]</sup> | <b>9</b> | -78        | 86                                    | 87:13                  |

<sup>[a]</sup> Approximate enantiomeric ratios determined by <sup>1</sup>H NMR analysis of diastereomeric Mosher ester derivatives <sup>[b]</sup>succinimide; <sup>[c]</sup>pentachlorophenyl; <sup>[d]</sup>pentafluorophenyl; <sup>[e]</sup>crystallization provided enrichment of the mother liquor up to 90:10 *er*; <sup>[f]</sup> reaction on 0.2 mmol scale; <sup>[g]</sup> reaction on 9 mmol scale.

**Mosher-acid chloride derivatization, representative procedure:**

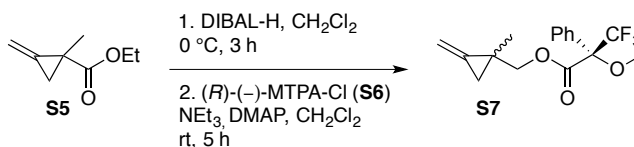

**Mosher Acid derivative (S7).** A solution of ethyl 1-methyl-2-methylenecyclopropane-1-carboxylate (**S5**) (0.0200 g, 0.143 mmol) in  $\text{CH}_2\text{Cl}_2$  (1 mL) was cooled to  $0\text{ }^\circ\text{C}$ , treated with DIBAL-H (0.385 mL, 1 M solution in hexanes, 0.385 mmol) and stirred at  $0\text{ }^\circ\text{C}$  for 3 h. The reaction mixture was treated successively with  $\text{H}_2\text{O}$  (15  $\mu\text{L}$ ), 15% NaOH (15  $\mu\text{L}$ ) and  $\text{H}_2\text{O}$  (39  $\mu\text{L}$ ), dried ( $\text{MgSO}_4$ ) and filtered through a pad of Celite washing with EtOAc and concentrated. A solution of crude alcohol in  $\text{CH}_2\text{Cl}_2$  (1.1 mL) under an inert atmosphere was treated sequentially with a solution of  $(R)$ -(-)-MTPA-Cl (**S6**)<sup>7</sup> (0.0278, 0.110 mmol) in  $\text{CH}_2\text{Cl}_2$  (0.5 mL), anhydrous  $\text{NEt}_3$  (0.0234 mL, 0.165 mmol) and DMAP



(0.000700 g, 0.00573 mmol). The resulting clear and colorless solution was stirred at room temperature for 5 h after which time TLC analysis indicated complete consumption of the alcohol starting material. The reaction was filtered through a small pad of Florisil (washing with 30% Et<sub>2</sub>O/ hexanes) and concentrated. <sup>1</sup>H NMR analysis of the crude reaction mixture showed a 1: 1 mixture of diastereomers.

**Racemic standard (entry 1) (500 MHz, CDCl<sub>3</sub>):**

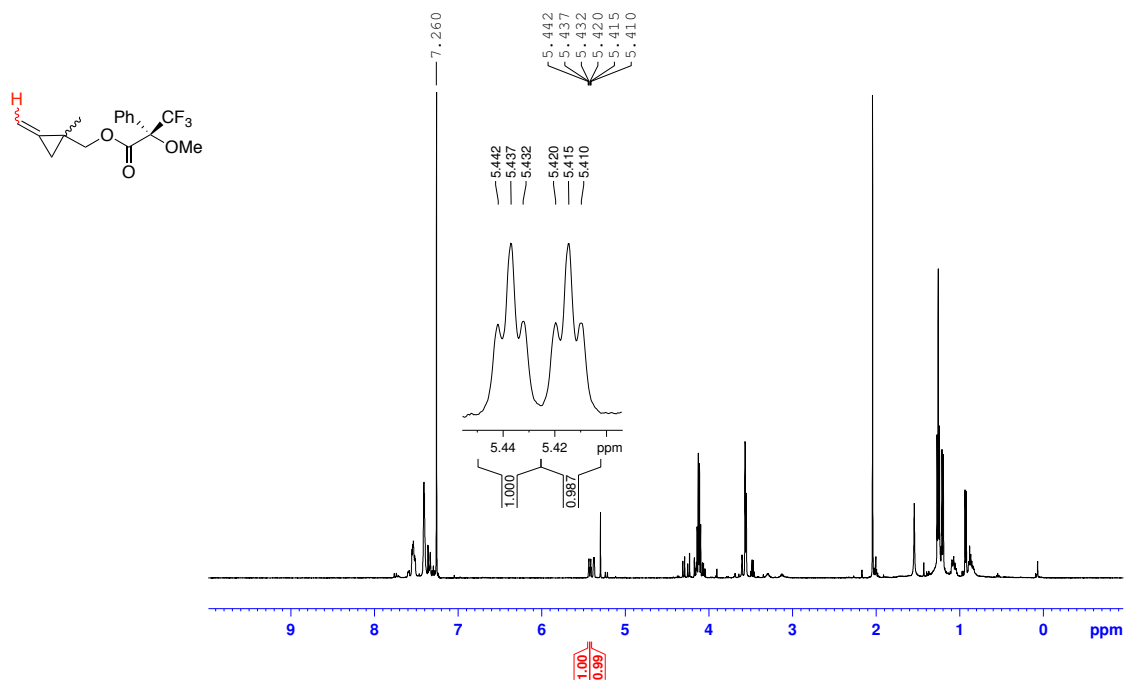

**Enantioenriched ester derivatives.** a) *t*-butyl derivative (entry 2, 700 MHz, CDCl<sub>3</sub>); (b) *t*-butyl derivative (entry 3, 700 MHz, CDCl<sub>3</sub>); (c) succinimide derivative (entry 4, 700 MHz, CDCl<sub>3</sub>); (d) pentachlorophenyl derivative (entry 5, 600 MHz, CDCl<sub>3</sub>); pentafluorophenyl derivative (entry 6, 600 MHz, CDCl<sub>3</sub>).

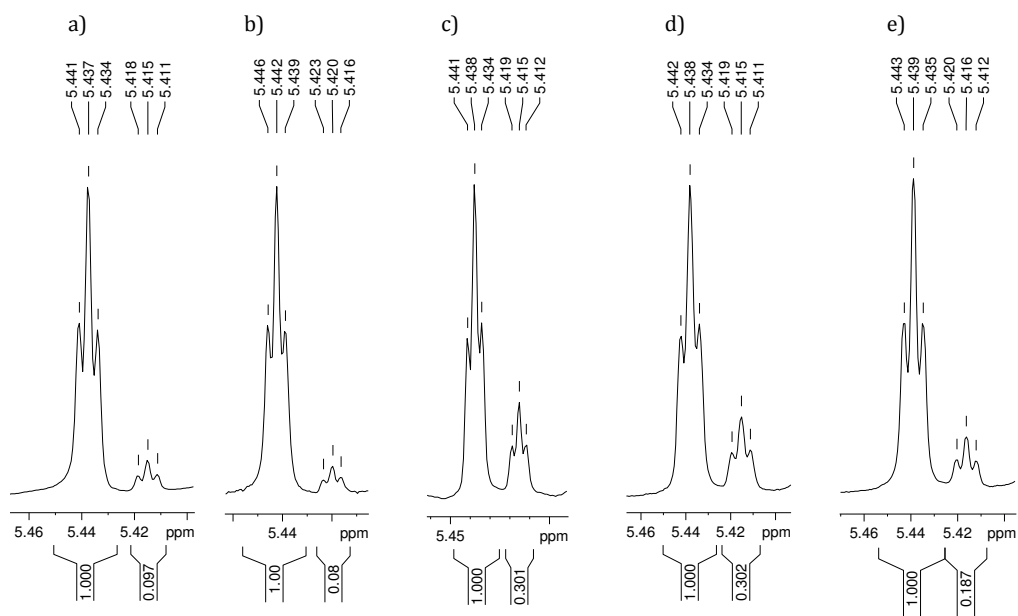

## X-ray structural information for **14**.

ORTEP Plot:

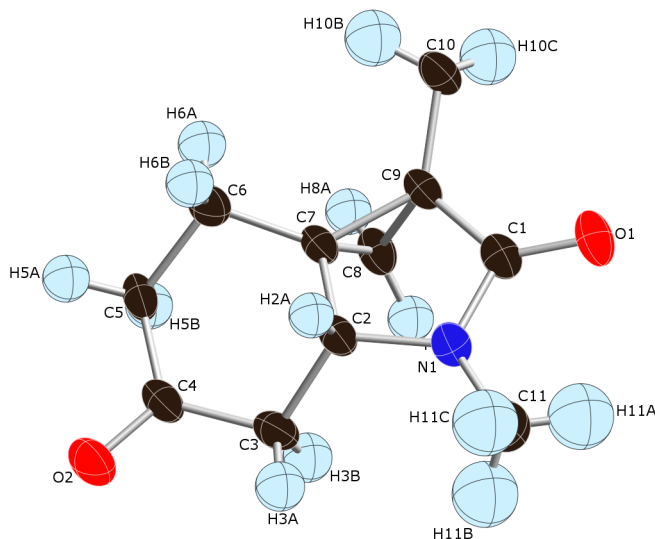

A specimen of  $C_{11}H_{15}NO_2$  was used for the X-ray crystallographic analysis. The X-ray intensity data were measured on a Bruker Apex II CCD system equipped with a Cu IMuS micro-focus ( $\lambda = 1.54178 \text{ \AA}$ ).

The total exposure time was 7.31 hours. The frames were integrated with the Bruker SAINT software package using a narrow-frame algorithm. The integration of the data using a monoclinic unit cell yielded a total of 6297 reflections to a maximum  $\theta$  angle of  $68.22^\circ$  ( $0.83 \text{ \AA}$  resolution), of which 1762 were independent (average redundancy 3.574, completeness = 96.9%,  $R_{\text{int}} = 3.94\%$ ) and 1639 (93.02%) were greater than  $2\sigma(F^2)$ . The final cell constants of  $\underline{a} = 6.8166(4) \text{ \AA}$ ,  $\underline{b} = 10.8726(6) \text{ \AA}$ ,  $\underline{c} = 13.4701(9) \text{ \AA}$ ,  $\beta = 91.661(4)^\circ$ , volume =  $997.91(10) \text{ \AA}^3$ , are based upon the refinement of the XYZ-centroids of 3600 reflections above  $20 \sigma(I)$  with  $10.45^\circ < 2\theta < 136.6^\circ$ . Data were corrected for absorption effects using the multi-scan method (SADABS). The ratio of minimum to maximum apparent transmission was 0.734. The calculated minimum and maximum transmission coefficients (based on crystal size) are 0.7200 and 0.8980.

The final anisotropic full-matrix least-squares refinement on  $F^2$  with 127 variables converged at  $R1 = 11.09\%$ , for the observed data and  $wR2 = 28.61\%$  for all data. The goodness-of-fit was 3.255. The largest peak in the final difference electron density synthesis was  $0.650 \text{ e}^-/\text{\AA}^3$  and the largest hole was  $-0.432 \text{ e}^-/\text{\AA}^3$  with an RMS deviation of  $0.126 \text{ e}^-/\text{\AA}^3$ . On the basis of the final model, the calculated density was  $1.286 \text{ g/cm}^3$  and  $F(000)$ ,  $416 \text{ e}^-$ .

**Table 1. Sample and crystal data for Ketone 14.**

|                               |                                                 |                |
|-------------------------------|-------------------------------------------------|----------------|
| <b>Identification code</b>    | Ketone 14                                       |                |
| <b>Chemical formula</b>       | C <sub>11</sub> H <sub>15</sub> NO <sub>2</sub> |                |
| <b>Formula weight</b>         | 193.24                                          |                |
| <b>Temperature</b>            | 150(2) K                                        |                |
| <b>Wavelength</b>             | 1.54178 Å                                       |                |
| <b>Crystal system</b>         | monoclinic                                      |                |
| <b>Space group</b>            | P 1 21/n 1                                      |                |
| <b>Unit cell dimensions</b>   | a = 6.8166(4) Å                                 | α = 90°        |
|                               | b = 10.8726(6) Å                                | β = 91.661(4)° |
|                               | c = 13.4701(9) Å                                | γ = 90°        |
| <b>Volume</b>                 | 997.91(10) Å <sup>3</sup>                       |                |
| <b>Z</b>                      | 4                                               |                |
| <b>Density (calculated)</b>   | 1.286 g/cm <sup>3</sup>                         |                |
| <b>Absorption coefficient</b> | 0.713 mm <sup>-1</sup>                          |                |
| <b>F(000)</b>                 | 416                                             |                |

**Table 2. Data collection and structure refinement for Ketone 14.**

|                                            |                                                                                                                                                              |  |
|--------------------------------------------|--------------------------------------------------------------------------------------------------------------------------------------------------------------|--|
| <b>Diffractometer</b>                      | Bruker Apex II CCD                                                                                                                                           |  |
| <b>Radiation source</b>                    | IMuS micro-focus, Cu                                                                                                                                         |  |
| <b>Theta range for data collection</b>     | 5.23 to 68.22°                                                                                                                                               |  |
| <b>Index ranges</b>                        | -7 ≤ h ≤ 8, -12 ≤ k ≤ 13, -15 ≤ l ≤ 16                                                                                                                       |  |
| <b>Reflections collected</b>               | 6297                                                                                                                                                         |  |
| <b>Independent reflections</b>             | 1762 [R(int) = 0.0394]                                                                                                                                       |  |
| <b>Coverage of independent reflections</b> | 96.9%                                                                                                                                                        |  |
| <b>Absorption correction</b>               | multi-scan                                                                                                                                                   |  |
| <b>Max. and min. transmission</b>          | 0.8980 and 0.7200                                                                                                                                            |  |
| <b>Refinement method</b>                   | Full-matrix least-squares on F <sup>2</sup>                                                                                                                  |  |
| <b>Refinement program</b>                  | SHELXL-2013 (Sheldrick, 2013)                                                                                                                                |  |
| <b>Function minimized</b>                  | Σ w(F <sub>o</sub> <sup>2</sup> - F <sub>c</sub> <sup>2</sup> ) <sup>2</sup>                                                                                 |  |
| <b>Data / restraints / parameters</b>      | 1762 / 0 / 127                                                                                                                                               |  |
| <b>Goodness-of-fit on F<sup>2</sup></b>    | 3.255                                                                                                                                                        |  |
| <b>Final R indices</b>                     | 1639 data; I > 2σ(I) R1 = 0.1109, wR2 = 0.2851                                                                                                               |  |
|                                            | all data R1 = 0.1135, wR2 = 0.2861                                                                                                                           |  |
| <b>Weighting scheme</b>                    | w = 1/[σ <sup>2</sup> (F <sub>o</sub> <sup>2</sup> ) + (0.0680P) <sup>2</sup> ]<br>where P = (F <sub>o</sub> <sup>2</sup> + 2F <sub>c</sub> <sup>2</sup> )/3 |  |

|                                    |                                   |
|------------------------------------|-----------------------------------|
| <b>Largest diff. peak and hole</b> | 0.650 and -0.432 eÅ <sup>-3</sup> |
| <b>R.M.S. deviation from mean</b>  | 0.126 eÅ <sup>-3</sup>            |

**Table 3. Atomic coordinates and equivalent isotropic atomic displacement parameters (Å<sup>2</sup>) for Ketone 14.**

U(eq) is defined as one third of the trace of the orthogonalized U<sub>ij</sub> tensor.

|     | <b>x/a</b> | <b>y/b</b> | <b>z/c</b> | <b>U(eq)</b> |
|-----|------------|------------|------------|--------------|
| O1  | 0.0224(4)  | 0.9844(2)  | 0.7226(2)  | 0.0381(7)    |
| O2  | 0.9272(4)  | 0.6922(3)  | 0.6518(2)  | 0.0512(9)    |
| N1  | 0.3009(4)  | 0.9050(3)  | 0.6553(2)  | 0.0315(7)    |
| C1  | 0.1848(5)  | 0.9371(3)  | 0.7317(2)  | 0.0292(8)    |
| C2  | 0.4996(5)  | 0.8724(3)  | 0.6886(2)  | 0.0291(8)    |
| C3  | 0.5962(6)  | 0.7631(3)  | 0.6392(2)  | 0.0348(9)    |
| C4  | 0.7842(5)  | 0.7290(3)  | 0.6951(3)  | 0.0331(9)    |
| C5  | 0.7852(5)  | 0.7314(3)  | 0.8077(3)  | 0.0319(8)    |
| C6  | 0.6745(5)  | 0.8406(3)  | 0.8527(2)  | 0.0324(8)    |
| C7  | 0.4814(5)  | 0.8480(3)  | 0.7981(2)  | 0.0263(8)    |
| C8  | 0.3199(5)  | 0.7594(3)  | 0.8246(3)  | 0.0302(8)    |
| C9  | 0.2853(5)  | 0.8985(3)  | 0.8271(2)  | 0.0270(8)    |
| C10 | 0.2416(6)  | 0.9656(3)  | 0.9212(3)  | 0.0361(9)    |
| C11 | 0.2457(7)  | 0.9283(4)  | 0.5531(3)  | 0.0498(11)   |

**Table 4. Bond lengths (Å) for Ketone 14.**

|        |          |        |          |
|--------|----------|--------|----------|
| O1-C1  | 1.224(4) | O2-C4  | 1.218(5) |
| N1-C1  | 1.362(4) | N1-C11 | 1.439(5) |
| N1-C2  | 1.459(5) | C1-C9  | 1.499(5) |
| C2-C7  | 1.507(4) | C2-C3  | 1.521(4) |
| C2-H2A | 1.0      | C3-C4  | 1.513(5) |
| C3-H3A | 0.99     | C3-H3B | 0.99     |
| C4-C5  | 1.516(5) | C5-C6  | 1.540(4) |
| C5-H5A | 0.99     | C5-H5B | 0.99     |
| C6-C7  | 1.491(5) | C6-H6A | 0.99     |
| C6-H6B | 0.99     | C7-C8  | 1.514(4) |
| C7-C9  | 1.507(4) | C8-C9  | 1.531(4) |

|          |          |          |      |
|----------|----------|----------|------|
| C8-H8A   | 0.99     | C8-H8B   | 0.99 |
| C9-C10   | 1.500(4) | C10-H10A | 0.98 |
| C10-H10B | 0.98     | C10-H10C | 0.98 |
| C11-H11A | 0.98     | C11-H11B | 0.98 |
| C11-H11C | 0.98     |          |      |

**Table 5. Bond angles (°) for Ketone 14.**

|             |          |               |           |
|-------------|----------|---------------|-----------|
| C1-N1-C11   | 122.5(3) | C1-N1-C2      | 112.6(3)  |
| C11-N1-C2   | 123.5(3) | O1-C1-N1      | 125.2(3)  |
| O1-C1-C9    | 126.4(3) | N1-C1-C9      | 108.4(3)  |
| N1-C2-C7    | 104.0(2) | N1-C2-C3      | 117.7(3)  |
| C7-C2-C3    | 109.8(3) | N1-C2-H2A     | 108.3     |
| C7-C2-H2A   | 108.3    | C3-C2-H2A     | 108.3     |
| C2-C3-C4    | 110.1(3) | C2-C3-H3A     | 109.6     |
| C4-C3-H3A   | 109.6    | C2-C3-H3B     | 109.6     |
| C4-C3-H3B   | 109.6    | H3A-C3-H3B    | 108.1     |
| O2-C4-C5    | 120.3(4) | O2-C4-C3      | 121.3(3)  |
| C5-C4-C3    | 118.2(3) | C4-C5-C6      | 114.7(3)  |
| C4-C5-H5A   | 108.6    | C6-C5-H5A     | 108.6     |
| C4-C5-H5B   | 108.6    | C6-C5-H5B     | 108.6     |
| H5A-C5-H5B  | 107.6    | C7-C6-C5      | 106.4(3)  |
| C7-C6-H6A   | 110.4    | C5-C6-H6A     | 110.4     |
| C7-C6-H6B   | 110.4    | C5-C6-H6B     | 110.4     |
| H6A-C6-H6B  | 108.6    | C6-C7-C8      | 119.1(3)  |
| C6-C7-C2    | 113.3(3) | C8-C7-C2      | 115.1(3)  |
| C6-C7-C9    | 132.0(3) | C8-C7-C9      | 60.9(2)   |
| C2-C7-C9    | 106.8(3) | C7-C8-C9      | 59.34(19) |
| C7-C8-H8A   | 117.8    | C9-C8-H8A     | 117.8     |
| C7-C8-H8B   | 117.8    | C9-C8-H8B     | 117.8     |
| H8A-C8-H8B  | 115.0    | C1-C9-C10     | 119.4(3)  |
| C1-C9-C7    | 105.4(2) | C10-C9-C7     | 126.6(3)  |
| C1-C9-C8    | 109.0(3) | C10-C9-C8     | 122.2(3)  |
| C7-C9-C8    | 59.8(2)  | C9-C10-H10A   | 109.5     |
| C9-C10-H10B | 109.5    | H10A-C10-H10B | 109.5     |

|               |       |               |       |
|---------------|-------|---------------|-------|
| C9-C10-H10C   | 109.5 | H10A-C10-H10C | 109.5 |
| H10B-C10-H10C | 109.5 | N1-C11-H11A   | 109.5 |
| N1-C11-H11B   | 109.5 | H11A-C11-H11B | 109.5 |
| N1-C11-H11C   | 109.5 | H11A-C11-H11C | 109.5 |
| H11B-C11-H11C | 109.5 |               |       |

**Table 6. Anisotropic atomic displacement parameters ( $\text{\AA}^2$ ) for Ketone 14.**

The anisotropic atomic displacement factor exponent takes the form:  $-2\pi^2 [h^2 a^{*2} U_{11} + \dots + 2hk a^* b^* U_{12}]$

|     | $U_{11}$   | $U_{22}$   | $U_{33}$   | $U_{23}$    | $U_{13}$   | $U_{12}$    |
|-----|------------|------------|------------|-------------|------------|-------------|
| O1  | 0.0285(13) | 0.0263(13) | 0.0595(16) | 0.0047(9)   | 0.0047(11) | 0.0067(9)   |
| O2  | 0.0309(16) | 0.0590(18) | 0.0644(18) | -0.0273(14) | 0.0112(13) | 0.0050(12)  |
| N1  | 0.0289(16) | 0.0321(14) | 0.0336(14) | 0.0020(10)  | 0.0033(11) | 0.0035(11)  |
| C1  | 0.0275(17) | 0.0176(14) | 0.0429(18) | -0.0003(11) | 0.0059(13) | -0.0020(12) |
| C2  | 0.0250(17) | 0.0277(16) | 0.0350(16) | -0.0030(11) | 0.0059(12) | 0.0020(12)  |
| C3  | 0.035(2)   | 0.0364(18) | 0.0336(16) | -0.0076(12) | 0.0091(14) | 0.0029(13)  |
| C4  | 0.0255(18) | 0.0251(15) | 0.0491(19) | -0.0113(12) | 0.0095(14) | -0.0026(12) |
| C5  | 0.0208(17) | 0.0279(16) | 0.0471(19) | -0.0030(12) | 0.0025(13) | 0.0029(12)  |
| C6  | 0.0275(18) | 0.0332(17) | 0.0369(16) | -0.0056(12) | 0.0051(13) | -0.0010(12) |
| C7  | 0.0227(17) | 0.0230(15) | 0.0336(15) | -0.0033(10) | 0.0064(12) | 0.0015(11)  |
| C8  | 0.0236(17) | 0.0238(16) | 0.0437(17) | 0.0017(11)  | 0.0068(13) | -0.0003(11) |
| C9  | 0.0232(17) | 0.0240(15) | 0.0341(16) | -0.0016(11) | 0.0076(12) | 0.0021(11)  |
| C10 | 0.0364(19) | 0.0353(18) | 0.0371(17) | -0.0047(13) | 0.0118(14) | 0.0058(13)  |
| C11 | 0.050(3)   | 0.059(3)   | 0.040(2)   | 0.0046(16)  | 0.0004(17) | 0.0117(19)  |

**Table 7. Hydrogen atomic coordinates and isotropic atomic displacement parameters ( $\text{\AA}^2$ ) for Ketone 14.**

|     | x/a    | y/b    | z/c    | U(eq) |
|-----|--------|--------|--------|-------|
| H2A | 0.5857 | 0.9460 | 0.6804 | 0.035 |
| H3A | 0.6255 | 0.7840 | 0.5697 | 0.042 |
| H3B | 0.5053 | 0.6921 | 0.6384 | 0.042 |
| H5A | 0.9231 | 0.7335 | 0.8328 | 0.038 |
| H5B | 0.7259 | 0.6540 | 0.8314 | 0.038 |
| H6A | 0.6552 | 0.8270 | 0.9244 | 0.039 |
| H6B | 0.7494 | 0.9178 | 0.8444 | 0.039 |

|      | <b>x/a</b> | <b>y/b</b> | <b>z/c</b> | <b>U(eq)</b> |
|------|------------|------------|------------|--------------|
| H8A  | 0.3327     | 0.7155     | 0.8889     | 0.036        |
| H8B  | 0.2555     | 0.7118     | 0.7702     | 0.036        |
| H10A | 0.2236     | 1.0533     | 0.9068     | 0.054        |
| H10B | 0.3512     | 0.9550     | 0.9691     | 0.054        |
| H10C | 0.1215     | 0.9324     | 0.9491     | 0.054        |
| H11A | 0.1059     | 0.9489     | 0.5480     | 0.075        |
| H11B | 0.2707     | 0.8546     | 0.5134     | 0.075        |
| H11C | 0.3231     | 0.9971     | 0.5282     | 0.075        |



## X-ray structural information for **16**.

ORTEP Plot:

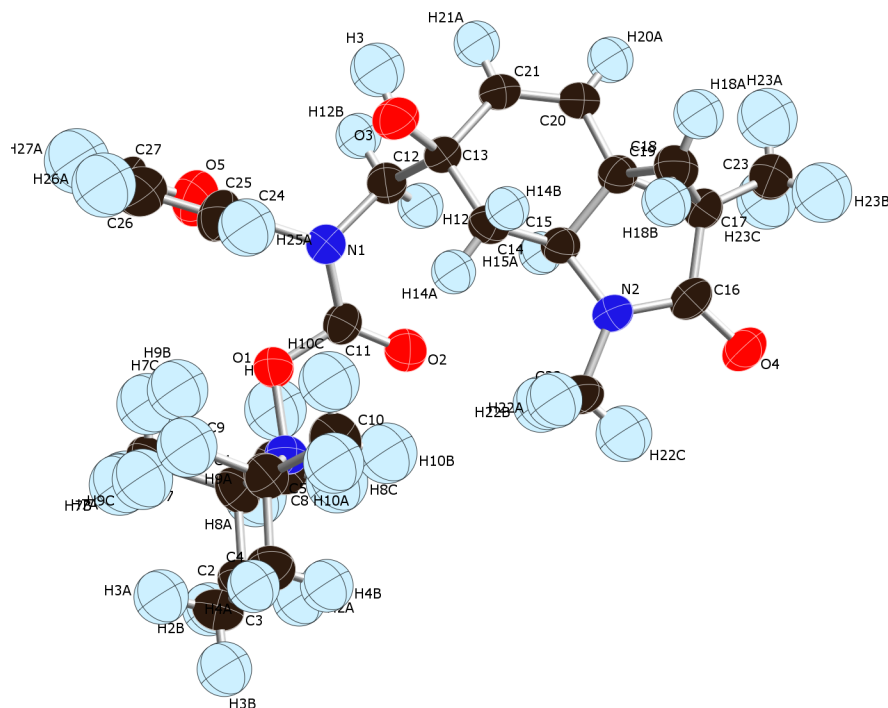

A specimen of  $C_{26}H_{37}N_3O_5$ , approximate dimensions 0.070 mm x 0.160 mm x 0.190 mm, was used for the X-ray crystallographic analysis. The X-ray intensity data were measured on a Bruker Apex II CCD system equipped with a Cu IMuS micro-focus ( $\lambda = 1.54178 \text{ \AA}$ ).

**Table 1: Data collection details for allylic alcohol 16.**

| Axis | dx/m<br>m | $2\theta/^\circ$ | $\omega/^\circ$ | $\phi/^\circ$ | $\chi/^\circ$ | Width/<br>° | Frame<br>s | Time/<br>s | Wavelength/<br>Å | Voltage/k<br>V | Current/m<br>A | Temperature/<br>K |
|------|-----------|------------------|-----------------|---------------|---------------|-------------|------------|------------|------------------|----------------|----------------|-------------------|
| Omeg | 40.17     | 102.9            | -               | -             | 54.6          | 0.50        | 376        | 10.00      | 1.54184          | 45             | 0.7            | 230               |
| a    | 4         | 0                | 81.10           | 144.9<br>5    | 5             | 0.50        | 376        | 10.00      | 1.54184          | 45             | 0.7            | 230               |
| Omeg | 40.17     | 103.1            | -               | -             | 54.6          | 0.50        | 376        | 10.00      | 1.54184          | 45             | 0.7            | 230               |
| a    | 4         | 9                | 80.81           | 76.57<br>5    | 5             | 0.50        | 376        | 10.00      | 1.54184          | 45             | 0.7            | 230               |
| Omeg | 40.17     | -                | -               | -             | 54.6          | 0.50        | 376        | 10.00      | 1.54184          | 45             | 0.7            | 230               |
| a    | 4         | 57.76            | 241.7<br>6      | 117.0<br>9    | 5             | 0.50        | 376        | 10.00      | 1.54184          | 45             | 0.7            | 230               |
| Omeg | 40.17     | 103.3            | -               | -             | 54.6          | 0.50        | 376        | 10.00      | 1.54184          | 45             | 0.7            | 230               |

| Axis | dx/m  | 2 $\theta$ / $^{\circ}$ | $\omega$ / $^{\circ}$ | $\varphi$ / $^{\circ}$ | $\chi$ / $^{\circ}$ | Width/<br>$^{\circ}$ | Frame<br>s | Time/<br>s | Wavelength/<br>$\text{\AA}$ | Voltage/k<br>V | Current/m<br>A | Temperature/<br>K |
|------|-------|-------------------------|-----------------------|------------------------|---------------------|----------------------|------------|------------|-----------------------------|----------------|----------------|-------------------|
| a    | 4     | 7                       | 80.63                 | 246.2                  | 5                   |                      |            |            |                             |                |                |                   |
|      |       |                         |                       | 9                      |                     |                      |            |            |                             |                |                |                   |
| Phi  | 40.17 | -                       | -                     | -                      | 54.6                |                      |            |            |                             |                |                |                   |
|      | 4     | 43.16                   | 140.8                 | 60.00                  | 5                   | 0.50                 | 416        | 10.00      | 1.54184                     | 45             | 0.7            | 230               |
|      |       |                         | 4                     |                        |                     |                      |            |            |                             |                |                |                   |
| Omeg | 40.17 | 105.1                   | -                     | -                      | 54.6                |                      |            |            |                             |                |                |                   |
| a    | 4     | 8                       | 78.82                 | 7.25                   | 5                   | 0.50                 | 376        | 10.00      | 1.54184                     | 45             | 0.7            | 230               |
|      |       |                         |                       |                        |                     |                      |            |            |                             |                |                |                   |
| Phi  | 40.17 | -                       | -                     | -                      | 54.6                |                      |            |            |                             |                |                |                   |
|      | 4     | 18.13                   | 14.13                 | 103.5                  | 5                   | 0.50                 | 446        | 10.00      | 1.54184                     | 45             | 0.7            | 230               |
|      |       |                         |                       | 0                      |                     |                      |            |            |                             |                |                |                   |
| Omeg | 40.17 | -                       | -                     | -                      | 54.6                |                      |            |            |                             |                |                |                   |
| a    | 4     | 104.3                   | 288.3                 | 115.5                  | 5                   | 0.50                 | 376        | 10.00      | 1.54184                     | 45             | 0.7            | 230               |
|      |       | 9                       | 9                     | 6                      |                     |                      |            |            |                             |                |                |                   |
| Omeg | 40.17 | -                       | -                     | -                      | 54.6                |                      |            |            |                             |                |                |                   |
| a    | 4     | 66.41                   | 117.5                 | 110.6                  | 5                   | 0.50                 | 376        | 10.00      | 1.54184                     | 45             | 0.7            | 230               |
|      |       |                         | 9                     | 7                      | 5                   |                      |            |            |                             |                |                |                   |

A total of 3494 frames were collected. The total exposure time was 9.71 hours. The frames were integrated with the Bruker SAINT software package using a narrow-frame algorithm. The integration of the data using a monoclinic unit cell yielded a total of 14241 reflections to a maximum  $\theta$  angle of  $68.50^{\circ}$  ( $0.83 \text{ \AA}$  resolution), of which 4735 were independent (average redundancy 3.008, completeness = 98.8%,  $R_{\text{int}} = 10.06\%$ ,  $R_{\text{sig}} = 12.98\%$ ) and 2672 (56.43%) were greater than  $2\sigma(F^2)$ . The final cell constants of  $a = 9.0643(13) \text{ \AA}$ ,  $b = 19.525(3) \text{ \AA}$ ,  $c = 15.1889(18) \text{ \AA}$ ,  $\beta = 104.307(11)^{\circ}$ , volume =  $2604.8(6) \text{ \AA}^3$ , are based upon the refinement of the XYZ-centroids of 1486 reflections above  $20 \sigma(I)$  with  $7.522^{\circ} < 2\theta < 134.2^{\circ}$ . Data were corrected for absorption effects using the multi-scan method (SADABS). The ratio of minimum to maximum apparent transmission was 0.600. The calculated minimum and maximum transmission coefficients (based on crystal size) are 0.8820 and 0.9540.

The structure was solved and refined using the Bruker SHELXTL Software Package, using the space group  $P 1 21/c 1$ , with  $Z = 4$  for the formula unit,  $C_{26}H_{37}N_3O_5$ . The final anisotropic full-matrix least-squares refinement on  $F^2$  with 317 variables converged at  $R1 = 9.22\%$ , for the observed data and  $wR2 = 22.52\%$  for all data. The goodness-of-fit was 1.152. The largest peak in the final difference electron density synthesis was  $0.544 \text{ e}^{-}/\text{\AA}^3$  and the largest hole was  $-0.279 \text{ e}^{-}/\text{\AA}^3$  with an RMS deviation of  $0.113 \text{ e}^{-}/\text{\AA}^3$ . On the basis of the final model, the calculated density was  $1.203 \text{ g/cm}^3$  and  $F(000)$ ,  $1016 \text{ e}^{-}$ .

**Table 2. Sample and crystal data for allylic alcohol 16.**

**Identification code** Allylic alcohol 16

|                               |                                                               |                  |
|-------------------------------|---------------------------------------------------------------|------------------|
| <b>Chemical formula</b>       | C <sub>26</sub> H <sub>37</sub> N <sub>3</sub> O <sub>5</sub> |                  |
| <b>Formula weight</b>         | 471.58 g/mol                                                  |                  |
| <b>Temperature</b>            | 229(2) K                                                      |                  |
| <b>Wavelength</b>             | 1.54178 Å                                                     |                  |
| <b>Crystal size</b>           | 0.070 x 0.160 x 0.190 mm                                      |                  |
| <b>Crystal system</b>         | monoclinic                                                    |                  |
| <b>Space group</b>            | P 1 21/c 1                                                    |                  |
| <b>Unit cell dimensions</b>   | a = 9.0643(13) Å                                              | α = 90°          |
|                               | b = 19.525(3) Å                                               | β = 104.307(11)° |
|                               | c = 15.1889(18) Å                                             | γ = 90°          |
| <b>Volume</b>                 | 2604.8(6) Å <sup>3</sup>                                      |                  |
| <b>Z</b>                      | 4                                                             |                  |
| <b>Density (calculated)</b>   | 1.203 g/cm <sup>3</sup>                                       |                  |
| <b>Absorption coefficient</b> | 0.676 mm <sup>-1</sup>                                        |                  |
| <b>F(000)</b>                 | 1016                                                          |                  |

**Table 3. Data collection and structure refinement for allylic alcohol 16.**

|                                            |                                                                              |
|--------------------------------------------|------------------------------------------------------------------------------|
| <b>Diffractometer</b>                      | Bruker Apex II CCD                                                           |
| <b>Radiation source</b>                    | IMuS micro-focus, Cu                                                         |
| <b>Theta range for data collection</b>     | 3.76 to 68.50°                                                               |
| <b>Index ranges</b>                        | -10 ≤ h ≤ 10, -23 ≤ k ≤ 22, -16 ≤ l ≤ 18                                     |
| <b>Reflections collected</b>               | 14241                                                                        |
| <b>Independent reflections</b>             | 4735 [R(int) = 0.1006]                                                       |
| <b>Coverage of independent reflections</b> | 98.8%                                                                        |
| <b>Absorption correction</b>               | multi-scan                                                                   |
| <b>Max. and min. transmission</b>          | 0.9540 and 0.8820                                                            |
| <b>Structure solution technique</b>        | direct methods                                                               |
| <b>Structure solution program</b>          | SHELXL-2014/6 (Sheldrick, 2014)                                              |
| <b>Refinement method</b>                   | Full-matrix least-squares on F <sup>2</sup>                                  |
| <b>Refinement program</b>                  | SHELXL-2014/6 (Sheldrick, 2014)                                              |
| <b>Function minimized</b>                  | Σ w(F <sub>o</sub> <sup>2</sup> - F <sub>c</sub> <sup>2</sup> ) <sup>2</sup> |
| <b>Data / restraints / parameters</b>      | 4735 / 0 / 317                                                               |
| <b>Goodness-of-fit on F<sup>2</sup></b>    | 1.152                                                                        |
| <b>Δ/σ<sub>max</sub></b>                   | 0.444                                                                        |

|                                    |                                                                   |
|------------------------------------|-------------------------------------------------------------------|
| <b>Final R indices</b>             | 2672 data; I>2σ(I) R1 = 0.0922, wR2 = 0.1973                      |
|                                    | all data R1 = 0.1407, wR2 = 0.2252                                |
| <b>Weighting scheme</b>            | $w=1/[\sigma^2(F_o^2)+(0.0680P)^2]$<br>where $P=(F_o^2+2F_c^2)/3$ |
| <b>Largest diff. peak and hole</b> | 0.544 and -0.279 eÅ <sup>-3</sup>                                 |
| <b>R.M.S. deviation from mean</b>  | 0.113 eÅ <sup>-3</sup>                                            |

**Table 4. Atomic coordinates and equivalent isotropic atomic displacement parameters (Å<sup>2</sup>) for allylic alcohol 16.**

U(eq) is defined as one third of the trace of the orthogonalized U<sub>ij</sub> tensor.

|     | x/a       | y/b         | z/c         | U(eq)      |
|-----|-----------|-------------|-------------|------------|
| O1  | 0.3718(3) | 0.71375(13) | 0.52526(16) | 0.0516(6)  |
| N1  | 0.5116(3) | 0.64695(15) | 0.63095(19) | 0.0496(7)  |
| C1  | 0.2265(5) | 0.81229(19) | 0.4733(3)   | 0.0568(9)  |
| O2  | 0.2715(3) | 0.67526(13) | 0.64034(17) | 0.0552(6)  |
| N2  | 0.1017(3) | 0.51393(16) | 0.7153(2)   | 0.0502(7)  |
| C2  | 0.0738(5) | 0.8347(2)   | 0.4110(3)   | 0.0678(11) |
| O3  | 0.6186(3) | 0.50353(15) | 0.67015(19) | 0.0611(7)  |
| C3  | 0.0408(5) | 0.8023(2)   | 0.3182(3)   | 0.0720(12) |
| O4  | 0.9160(3) | 0.48706(15) | 0.78893(18) | 0.0625(7)  |
| C4  | 0.0416(5) | 0.7250(2)   | 0.3283(3)   | 0.0668(11) |
| O5  | 0.7218(4) | 0.7042(2)   | 0.6037(3)   | 0.0996(12) |
| C5  | 0.1922(4) | 0.69733(19) | 0.3868(3)   | 0.0559(9)  |
| N3  | 0.2205(3) | 0.73570(14) | 0.47447(19) | 0.0482(7)  |
| C7  | 0.3604(5) | 0.8431(2)   | 0.4429(3)   | 0.0720(12) |
| C8  | 0.2333(6) | 0.8356(2)   | 0.5698(3)   | 0.0736(12) |
| C9  | 0.3164(5) | 0.7003(2)   | 0.3358(3)   | 0.0704(11) |
| C10 | 0.1692(5) | 0.6225(2)   | 0.4119(3)   | 0.0710(12) |
| C11 | 0.3728(4) | 0.67788(17) | 0.6028(2)   | 0.0458(8)  |
| C12 | 0.5498(4) | 0.61392(19) | 0.7211(2)   | 0.0490(8)  |
| C13 | 0.5255(4) | 0.53573(18) | 0.7206(2)   | 0.0454(8)  |
| C14 | 0.3612(4) | 0.51508(18) | 0.6747(2)   | 0.0466(8)  |
| C15 | 0.2649(4) | 0.52448(17) | 0.7410(2)   | 0.0439(8)  |

|     | x/a       | y/b         | z/c       | U(eq)      |
|-----|-----------|-------------|-----------|------------|
| C16 | 0.0485(4) | 0.48754(19) | 0.7840(2) | 0.0496(9)  |
| C17 | 0.1795(4) | 0.45581(19) | 0.8527(2) | 0.0504(8)  |
| C18 | 0.2570(5) | 0.40365(19) | 0.8060(3) | 0.0590(10) |
| C19 | 0.3184(4) | 0.47538(17) | 0.8191(2) | 0.0463(8)  |
| C20 | 0.4791(4) | 0.48566(19) | 0.8650(2) | 0.0496(8)  |
| C21 | 0.5722(4) | 0.51259(19) | 0.8194(2) | 0.0501(9)  |
| C22 | 0.0055(4) | 0.5512(2)   | 0.6400(3) | 0.0603(10) |
| C23 | 0.1694(5) | 0.4478(2)   | 0.9491(3) | 0.0688(11) |
| C24 | 0.6214(4) | 0.6528(2)   | 0.5824(3) | 0.0621(11) |
| C25 | 0.6469(5) | 0.6171(3)   | 0.5111(3) | 0.0795(13) |
| C26 | 0.7654(6) | 0.6461(4)   | 0.4848(4) | 0.0994(18) |
| C27 | 0.8131(5) | 0.6977(4)   | 0.5412(4) | 0.102(2)   |

**Table 5. Bond lengths (Å) for allylic alcohol 16.**

|        |          |        |          |
|--------|----------|--------|----------|
| O1-C11 | 1.368(4) | O1-N3  | 1.462(4) |
| N1-C11 | 1.366(5) | N1-C24 | 1.383(5) |
| N1-C12 | 1.476(4) | C1-N3  | 1.497(5) |
| C1-C8  | 1.521(6) | C1-C7  | 1.525(6) |
| C1-C2  | 1.534(6) | O2-C11 | 1.196(4) |
| N2-C16 | 1.354(5) | N2-C15 | 1.448(4) |
| N2-C22 | 1.452(5) | C2-C3  | 1.505(6) |
| C2-H2A | 0.98     | C2-H2B | 0.98     |
| O3-C13 | 1.419(4) | O3-H3  | 0.87(5)  |
| C3-C4  | 1.517(6) | C3-H3A | 0.98     |
| C3-H3B | 0.98     | O4-C16 | 1.222(4) |
| C4-C5  | 1.531(6) | C4-H4A | 0.98     |
| C4-H4B | 0.98     | O5-C24 | 1.339(6) |
| O5-C27 | 1.412(7) | C5-N3  | 1.494(5) |
| C5-C9  | 1.517(6) | C5-C10 | 1.538(6) |
| C7-H7A | 0.97     | C7-H7B | 0.97     |
| C7-H7C | 0.97     | C8-H8A | 0.97     |
| C8-H8B | 0.97     | C8-H8C | 0.97     |
| C9-H9A | 0.97     | C9-H9B | 0.97     |

|          |          |          |          |
|----------|----------|----------|----------|
| C9-H9C   | 0.97     | C10-H10A | 0.97     |
| C10-H10B | 0.97     | C10-H10C | 0.97     |
| C12-C13  | 1.542(5) | C12-H12A | 0.98     |
| C12-H12B | 0.98     | C13-C21  | 1.524(5) |
| C13-C14  | 1.534(5) | C14-C15  | 1.497(5) |
| C14-H14A | 0.98     | C14-H14B | 0.98     |
| C15-C19  | 1.509(5) | C15-H15A | 0.99     |
| C16-C17  | 1.506(5) | C17-C23  | 1.497(5) |
| C17-C18  | 1.509(5) | C17-C19  | 1.519(5) |
| C18-C19  | 1.502(5) | C18-H18A | 0.98     |
| C18-H18B | 0.98     | C19-C20  | 1.465(5) |
| C20-C21  | 1.326(5) | C20-H20A | 0.94     |
| C21-H21A | 0.94     | C22-H22A | 0.97     |
| C22-H22B | 0.97     | C22-H22C | 0.97     |
| C23-H23A | 0.97     | C23-H23B | 0.97     |
| C23-H23C | 0.97     | C24-C25  | 1.354(7) |
| C25-C26  | 1.358(7) | C25-H25A | 0.94     |
| C26-C27  | 1.324(9) | C26-H26A | 0.94     |
| C27-H27A | 0.94     |          |          |

**Table 6. Bond angles (°) for allylic alcohol 16.**

|            |          |            |          |
|------------|----------|------------|----------|
| C11-O1-N3  | 114.2(2) | C11-N1-C24 | 121.7(3) |
| C11-N1-C12 | 118.1(3) | C24-N1-C12 | 119.8(3) |
| N3-C1-C8   | 106.3(3) | N3-C1-C7   | 115.6(3) |
| C8-C1-C7   | 109.1(3) | N3-C1-C2   | 105.2(3) |
| C8-C1-C2   | 109.0(4) | C7-C1-C2   | 111.4(3) |
| C16-N2-C15 | 112.4(3) | C16-N2-C22 | 122.6(3) |
| C15-N2-C22 | 121.0(3) | C3-C2-C1   | 113.5(4) |
| C3-C2-H2A  | 108.9    | C1-C2-H2A  | 108.9    |
| C3-C2-H2B  | 108.9    | C1-C2-H2B  | 108.9    |
| H2A-C2-H2B | 107.7    | C13-O3-H3  | 120.(3)  |
| C2-C3-C4   | 109.2(3) | C2-C3-H3A  | 109.9    |
| C4-C3-H3A  | 109.8    | C2-C3-H3B  | 109.8    |
| C4-C3-H3B  | 109.8    | H3A-C3-H3B | 108.3    |

|               |          |               |          |
|---------------|----------|---------------|----------|
| C3-C4-C5      | 113.0(3) | C3-C4-H4A     | 109.0    |
| C5-C4-H4A     | 109.0    | C3-C4-H4B     | 109.0    |
| C5-C4-H4B     | 109.0    | H4A-C4-H4B    | 107.8    |
| C24-O5-C27    | 104.2(5) | N3-C5-C9      | 116.8(3) |
| N3-C5-C4      | 105.8(3) | C9-C5-C4      | 111.0(4) |
| N3-C5-C10     | 105.0(3) | C9-C5-C10     | 109.0(3) |
| C4-C5-C10     | 108.8(3) | O1-N3-C1      | 105.5(2) |
| O1-N3-C5      | 104.8(3) | C1-N3-C5      | 119.3(3) |
| C1-C7-H7A     | 109.5    | C1-C7-H7B     | 109.5    |
| H7A-C7-H7B    | 109.5    | C1-C7-H7C     | 109.5    |
| H7A-C7-H7C    | 109.5    | H7B-C7-H7C    | 109.5    |
| C1-C8-H8A     | 109.5    | C1-C8-H8B     | 109.5    |
| H8A-C8-H8B    | 109.5    | C1-C8-H8C     | 109.5    |
| H8A-C8-H8C    | 109.5    | H8B-C8-H8C    | 109.5    |
| C5-C9-H9A     | 109.5    | C5-C9-H9B     | 109.5    |
| H9A-C9-H9B    | 109.5    | C5-C9-H9C     | 109.5    |
| H9A-C9-H9C    | 109.5    | H9B-C9-H9C    | 109.5    |
| C5-C10-H10A   | 109.5    | C5-C10-H10B   | 109.5    |
| H10A-C10-H10B | 109.5    | C5-C10-H10C   | 109.5    |
| H10A-C10-H10C | 109.5    | H10B-C10-H10C | 109.5    |
| O2-C11-O1     | 126.2(3) | O2-C11-N1     | 126.0(3) |
| O1-C11-N1     | 107.8(3) | N1-C12-C13    | 115.3(3) |
| N1-C12-H12A   | 108.5    | C13-C12-H12A  | 108.5    |
| N1-C12-H12B   | 108.5    | C13-C12-H12B  | 108.5    |
| H12A-C12-H12B | 107.5    | O3-C13-C21    | 110.0(3) |
| O3-C13-C14    | 106.2(3) | C21-C13-C14   | 111.8(3) |
| O3-C13-C12    | 109.8(3) | C21-C13-C12   | 106.5(3) |
| C14-C13-C12   | 112.6(3) | C15-C14-C13   | 108.9(3) |
| C15-C14-H14A  | 109.9    | C13-C14-H14A  | 109.9    |
| C15-C14-H14B  | 109.9    | C13-C14-H14B  | 109.9    |
| H14A-C14-H14B | 108.3    | N2-C15-C14    | 121.9(3) |
| N2-C15-C19    | 103.2(3) | C14-C15-C19   | 108.9(3) |
| N2-C15-H15A   | 107.4    | C14-C15-H15A  | 107.4    |
| C19-C15-H15A  | 107.4    | O4-C16-N2     | 126.3(3) |

|               |          |               |          |
|---------------|----------|---------------|----------|
| O4-C16-C17    | 125.0(3) | N2-C16-C17    | 108.7(3) |
| C23-C17-C16   | 119.4(3) | C23-C17-C18   | 122.5(3) |
| C16-C17-C18   | 109.3(3) | C23-C17-C19   | 127.7(3) |
| C16-C17-C19   | 103.9(3) | C18-C17-C19   | 59.5(2)  |
| C19-C18-C17   | 60.6(2)  | C19-C18-H18A  | 117.7    |
| C17-C18-H18A  | 117.7    | C19-C18-H18B  | 117.7    |
| C17-C18-H18B  | 117.7    | H18A-C18-H18B | 114.8    |
| C20-C19-C18   | 118.9(3) | C20-C19-C15   | 112.1(3) |
| C18-C19-C15   | 116.9(3) | C20-C19-C17   | 133.1(3) |
| C18-C19-C17   | 59.9(2)  | C15-C19-C17   | 107.0(3) |
| C21-C20-C19   | 119.4(3) | C21-C20-H20A  | 120.3    |
| C19-C20-H20A  | 120.3    | C20-C21-C13   | 125.0(3) |
| C20-C21-H21A  | 117.5    | C13-C21-H21A  | 117.5    |
| N2-C22-H22A   | 109.5    | N2-C22-H22B   | 109.5    |
| H22A-C22-H22B | 109.5    | N2-C22-H22C   | 109.5    |
| H22A-C22-H22C | 109.5    | H22B-C22-H22C | 109.5    |
| C17-C23-H23A  | 109.5    | C17-C23-H23B  | 109.5    |
| H23A-C23-H23B | 109.5    | C17-C23-H23C  | 109.5    |
| H23A-C23-H23C | 109.5    | H23B-C23-H23C | 109.5    |
| O5-C24-C25    | 109.8(4) | O5-C24-N1     | 117.9(4) |
| C25-C24-N1    | 132.2(4) | C26-C25-C24   | 108.9(6) |
| C26-C25-H25A  | 125.5    | C24-C25-H25A  | 125.5    |
| C27-C26-C25   | 106.4(5) | C27-C26-H26A  | 126.8    |
| C25-C26-H26A  | 126.8    | C26-C27-O5    | 110.5(4) |
| C26-C27-H27A  | 124.7    | O5-C27-H27A   | 124.7    |

**Table 7. Anisotropic atomic displacement parameters ( $\text{\AA}^2$ ) for allylic alcohol 16.**

The anisotropic atomic displacement factor exponent takes the form:  $-2\pi^2 [ h^2 a^{*2} U_{11} + \dots + 2 h k a^* b^* U_{12} ]$

|    | $U_{11}$   | $U_{22}$   | $U_{33}$   | $U_{23}$   | $U_{13}$   | $U_{12}$    |
|----|------------|------------|------------|------------|------------|-------------|
| O1 | 0.0494(13) | 0.0528(15) | 0.0509(14) | 0.0085(10) | 0.0090(11) | 0.0004(11)  |
| N1 | 0.0460(16) | 0.0529(18) | 0.0498(17) | 0.0047(13) | 0.0115(13) | -0.0013(13) |
| C1 | 0.072(2)   | 0.041(2)   | 0.054(2)   | 0.0015(15) | 0.0103(18) | -0.0050(18) |
| O2 | 0.0563(15) | 0.0517(15) | 0.0601(15) | 0.0054(11) | 0.0191(12) | 0.0061(11)  |



|     | U <sub>11</sub> | U <sub>22</sub> | U <sub>33</sub> | U <sub>23</sub> | U <sub>13</sub> | U <sub>12</sub> |
|-----|-----------------|-----------------|-----------------|-----------------|-----------------|-----------------|
| N2  | 0.0383(14)      | 0.0550(18)      | 0.0546(18)      | 0.0060(13)      | 0.0064(13)      | 0.0002(13)      |
| C2  | 0.075(3)        | 0.047(2)        | 0.076(3)        | 0.0079(18)      | 0.008(2)        | 0.0086(19)      |
| O3  | 0.0521(15)      | 0.0726(19)      | 0.0608(17)      | 0.0011(13)      | 0.0184(13)      | 0.0117(13)      |
| C3  | 0.074(3)        | 0.071(3)        | 0.064(3)        | 0.015(2)        | 0.004(2)        | 0.003(2)        |
| O4  | 0.0415(14)      | 0.082(2)        | 0.0639(17)      | -0.0004(13)     | 0.0131(12)      | -0.0044(12)     |
| C4  | 0.069(3)        | 0.066(3)        | 0.058(2)        | -0.0028(19)     | 0.0009(19)      | -0.007(2)       |
| O5  | 0.078(2)        | 0.121(3)        | 0.094(2)        | 0.024(2)        | 0.0105(18)      | -0.035(2)       |
| C5  | 0.063(2)        | 0.049(2)        | 0.053(2)        | -0.0044(15)     | 0.0083(17)      | -0.0076(17)     |
| N3  | 0.0487(16)      | 0.0405(16)      | 0.0515(17)      | 0.0004(12)      | 0.0051(13)      | -0.0008(12)     |
| C7  | 0.083(3)        | 0.057(3)        | 0.070(3)        | 0.0068(19)      | 0.010(2)        | -0.018(2)       |
| C8  | 0.097(3)        | 0.048(2)        | 0.071(3)        | -0.0113(18)     | 0.011(2)        | -0.003(2)       |
| C9  | 0.084(3)        | 0.072(3)        | 0.055(2)        | -0.0025(19)     | 0.018(2)        | 0.002(2)        |
| C10 | 0.091(3)        | 0.046(2)        | 0.073(3)        | -0.0142(18)     | 0.014(2)        | -0.009(2)       |
| C11 | 0.0458(18)      | 0.0427(19)      | 0.050(2)        | -0.0045(15)     | 0.0144(16)      | -0.0033(15)     |
| C12 | 0.0461(18)      | 0.055(2)        | 0.0433(19)      | 0.0024(15)      | 0.0070(15)      | -0.0037(16)     |
| C13 | 0.0383(16)      | 0.051(2)        | 0.0484(19)      | 0.0062(15)      | 0.0136(14)      | 0.0035(15)      |
| C14 | 0.0480(18)      | 0.0424(18)      | 0.0468(19)      | 0.0012(14)      | 0.0069(15)      | 0.0019(15)      |
| C15 | 0.0391(16)      | 0.0395(18)      | 0.0505(19)      | 0.0024(14)      | 0.0060(14)      | -0.0005(14)     |
| C16 | 0.0396(19)      | 0.053(2)        | 0.056(2)        | -0.0105(16)     | 0.0111(15)      | -0.0069(15)     |
| C17 | 0.0439(18)      | 0.052(2)        | 0.054(2)        | 0.0026(15)      | 0.0101(15)      | -0.0044(16)     |
| C18 | 0.063(2)        | 0.044(2)        | 0.067(2)        | 0.0049(16)      | 0.0109(18)      | -0.0031(17)     |
| C19 | 0.0432(17)      | 0.0421(19)      | 0.053(2)        | 0.0015(14)      | 0.0109(15)      | 0.0011(14)      |
| C20 | 0.0441(18)      | 0.054(2)        | 0.049(2)        | 0.0071(15)      | 0.0078(15)      | 0.0064(16)      |
| C21 | 0.0385(17)      | 0.060(2)        | 0.049(2)        | 0.0057(16)      | 0.0053(15)      | 0.0041(16)      |
| C22 | 0.0469(19)      | 0.064(3)        | 0.062(2)        | 0.0065(18)      | -0.0016(17)     | -0.0004(17)     |
| C23 | 0.061(2)        | 0.082(3)        | 0.063(3)        | 0.013(2)        | 0.0139(19)      | -0.010(2)       |
| C24 | 0.0425(19)      | 0.076(3)        | 0.066(3)        | 0.027(2)        | 0.0112(18)      | -0.0012(19)     |
| C25 | 0.071(3)        | 0.104(4)        | 0.074(3)        | 0.019(3)        | 0.039(2)        | 0.014(3)        |
| C26 | 0.072(3)        | 0.142(6)        | 0.088(4)        | 0.028(4)        | 0.026(3)        | 0.011(3)        |
| C27 | 0.048(2)        | 0.149(6)        | 0.111(4)        | 0.057(4)        | 0.024(3)        | -0.023(3)       |

**Table 8. Hydrogen atomic coordinates and isotropic atomic displacement parameters ( $\text{\AA}^2$ ) for allylic alcohol**

16.

|      | <b>x/a</b> | <b>y/b</b> | <b>z/c</b> | <b>U(eq)</b> |
|------|------------|------------|------------|--------------|
| H2A  | -0.0081    | 0.8228     | 0.4400     | 0.081        |
| H2B  | 0.0740     | 0.8846     | 0.4042     | 0.081        |
| H3   | 0.715(6)   | 0.498(3)   | 0.694(3)   | 0.083(15)    |
| H3A  | 0.1181     | 0.8162     | 0.2867     | 0.086        |
| H3B  | -0.0588    | 0.8175     | 0.2821     | 0.086        |
| H4A  | 0.0219     | 0.7040     | 0.2679     | 0.08         |
| H4B  | -0.0412    | 0.7115     | 0.3558     | 0.08         |
| H7A  | 0.3642     | 0.8921     | 0.4540     | 0.108        |
| H7B  | 0.3479     | 0.8346     | 0.3786     | 0.108        |
| H7C  | 0.4544     | 0.8223     | 0.4769     | 0.108        |
| H8A  | 0.2218     | 0.8849     | 0.5708     | 0.11         |
| H8B  | 0.3307     | 0.8227     | 0.6094     | 0.11         |
| H8C  | 0.1519     | 0.8139     | 0.5908     | 0.11         |
| H9A  | 0.3026     | 0.6630     | 0.2922     | 0.106        |
| H9B  | 0.4151     | 0.6959     | 0.3785     | 0.106        |
| H9C  | 0.3110     | 0.7437     | 0.3041     | 0.106        |
| H10A | 0.1255     | 0.5966     | 0.3571     | 0.106        |
| H10B | 0.1009     | 0.6209     | 0.4520     | 0.106        |
| H10C | 0.2666     | 0.6027     | 0.4424     | 0.106        |
| H12A | 0.4879     | 0.6350     | 0.7584     | 0.059        |
| H12B | 0.6568     | 0.6236     | 0.7504     | 0.059        |
| H14A | 0.3220     | 0.5435     | 0.6209     | 0.056        |
| H14B | 0.3581     | 0.4671     | 0.6554     | 0.056        |
| H15A | 0.2833     | 0.5715     | 0.7658     | 0.053        |
| H18A | 0.3161     | 0.3674     | 0.8435     | 0.071        |
| H18B | 0.2043     | 0.3895     | 0.7444     | 0.071        |
| H20A | 0.5159     | 0.4733     | 0.9263     | 0.06         |
| H21A | 0.6750     | 0.5178     | 0.8504     | 0.06         |
| H22A | 0.0136     | 0.5309     | 0.5831     | 0.09         |
| H22B | 0.0381     | 0.5987     | 0.6422     | 0.09         |
| H22C | -0.0994    | 0.5491     | 0.6443     | 0.09         |
| H23A | 0.2653     | 0.4304     | 0.9856     | 0.103        |
| H23B | 0.0883     | 0.4160     | 0.9515     | 0.103        |

|      | <b>x/a</b> | <b>y/b</b> | <b>z/c</b> | <b>U(eq)</b> |
|------|------------|------------|------------|--------------|
| H23C | 0.1481     | 0.4920     | 0.9726     | 0.103        |
| H25A | 0.5916     | 0.5786     | 0.4843     | 0.095        |
| H26A | 0.8055     | 0.6322     | 0.4362     | 0.119        |
| H27A | 0.8963     | 0.7261     | 0.5398     | 0.122        |

## References

- [<sup>1</sup>] T. Hashimoto, H. Miyamoto, Y. Naganawa, K. Maruoka, *J. Am. Chem. Soc.* **2009**, *131*, 11280–11281.
- [<sup>2</sup>] T. Goto, K. Takeda, N. Shimada, H. Nambu, M. Anada, M. Shiro, K. Ando, S. Hashimoto, *Angew. Chem. Int. Ed.* **2011**, *50*, 6803–6808; the catalyst was used crude after extraction and removing trace solvent under high vacuum.
- [<sup>3</sup>] F. R. Petronijevic, P. Wipf, *J. Am. Chem. Soc.* **2011**, *133*, 7704–7707.
- [<sup>4</sup>] F. Petronijevic, PhD. Dissertation, University of Pittsburgh, 2012.
- [<sup>5</sup>] A. Padwa, K. R. Crawford, P. Rashatasakhon, M. Rose, *J. Org. Chem.* **2003**, *68*, 2609–2617.
- [<sup>6</sup>] J. Åhman, P. Somfai, *Synth. Commun.* **1994**, *24*, 1117–1120.
- [<sup>7</sup>] D. E. Ward, C. K. Rhee, *Tetrahedron Lett.* **1991**, *32*, 7165–7166.

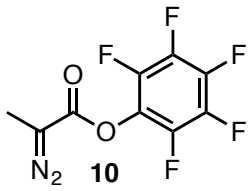

C<sub>6</sub>D<sub>6</sub>, 300 MHz

— 7.160

— 1.204

— 0.406

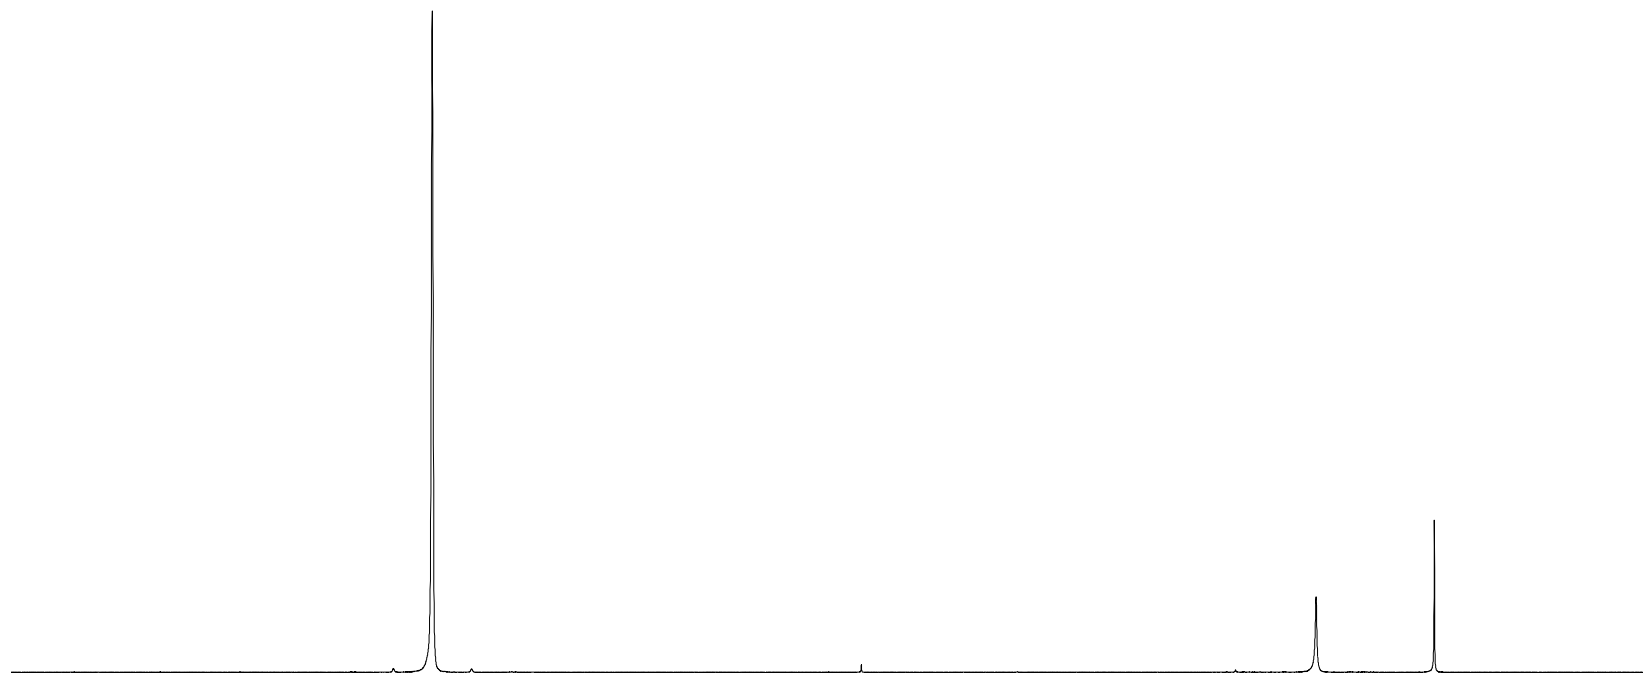

3.00

ppm

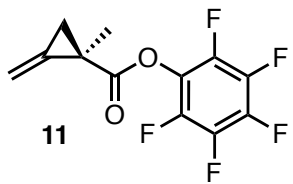

CD<sub>2</sub>Cl<sub>2</sub>, 400 MHz

5.651  
5.644  
5.637  
5.569  
5.564  
5.558  
5.320

2.317  
2.311  
2.305  
2.294  
2.288  
2.281  
1.644  
1.638  
1.632  
1.621  
1.615  
1.609  
1.528  
1.514

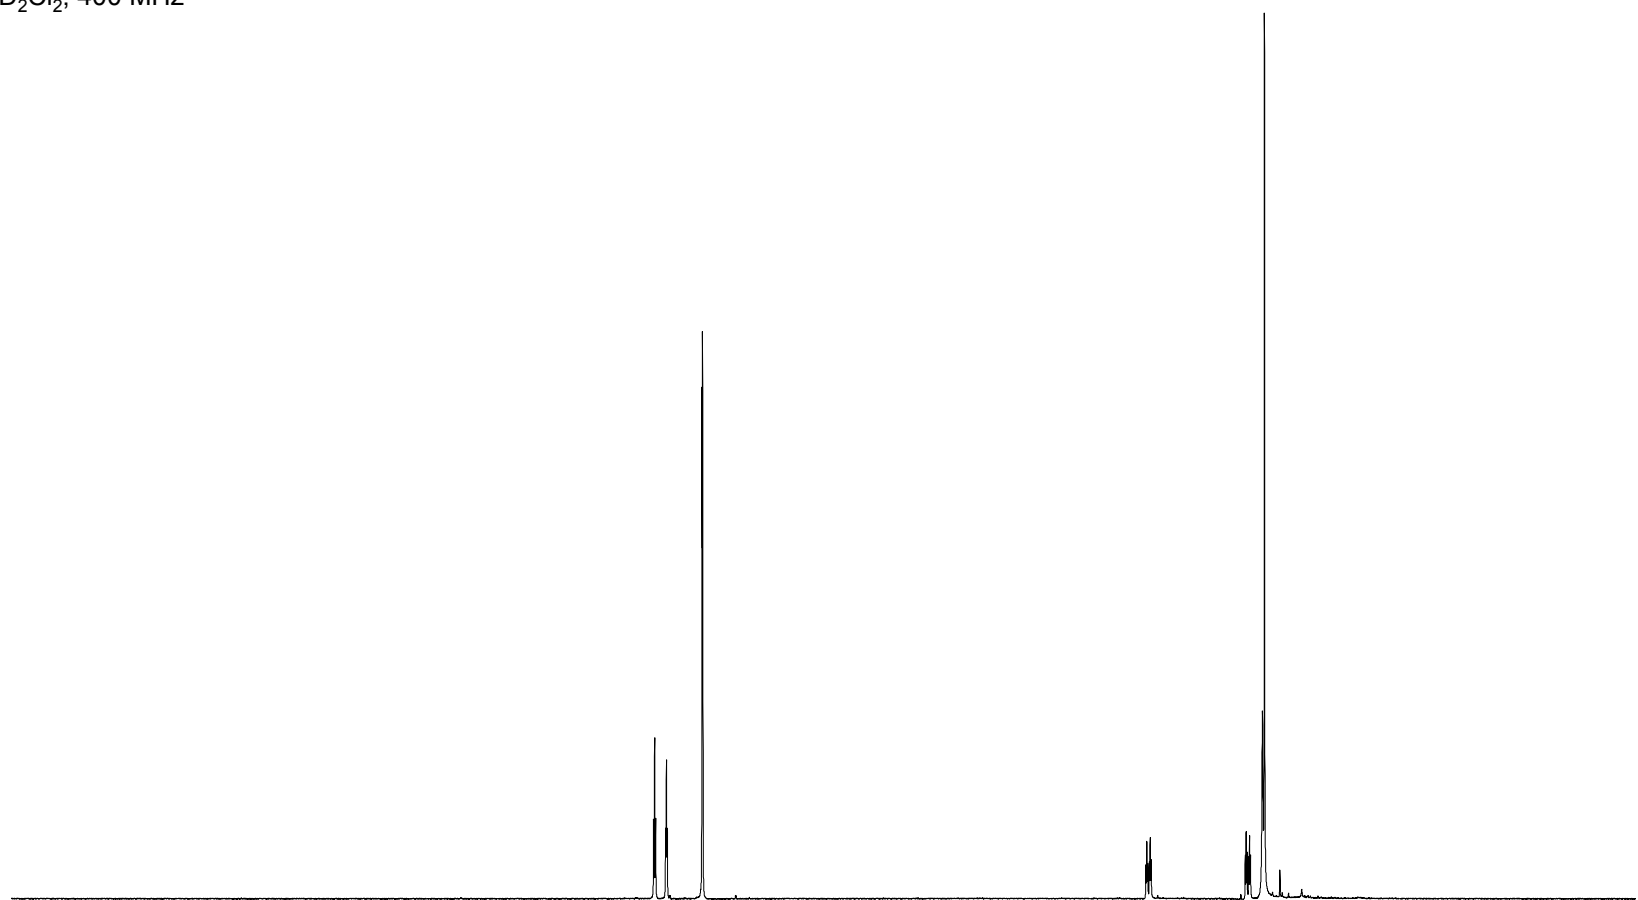

9

8

7

6

5

4

3

2

1

0

ppm

1.00  
1.00

1.04

1.02  
3.44



CD<sub>2</sub>Cl<sub>2</sub>, 100 MHz

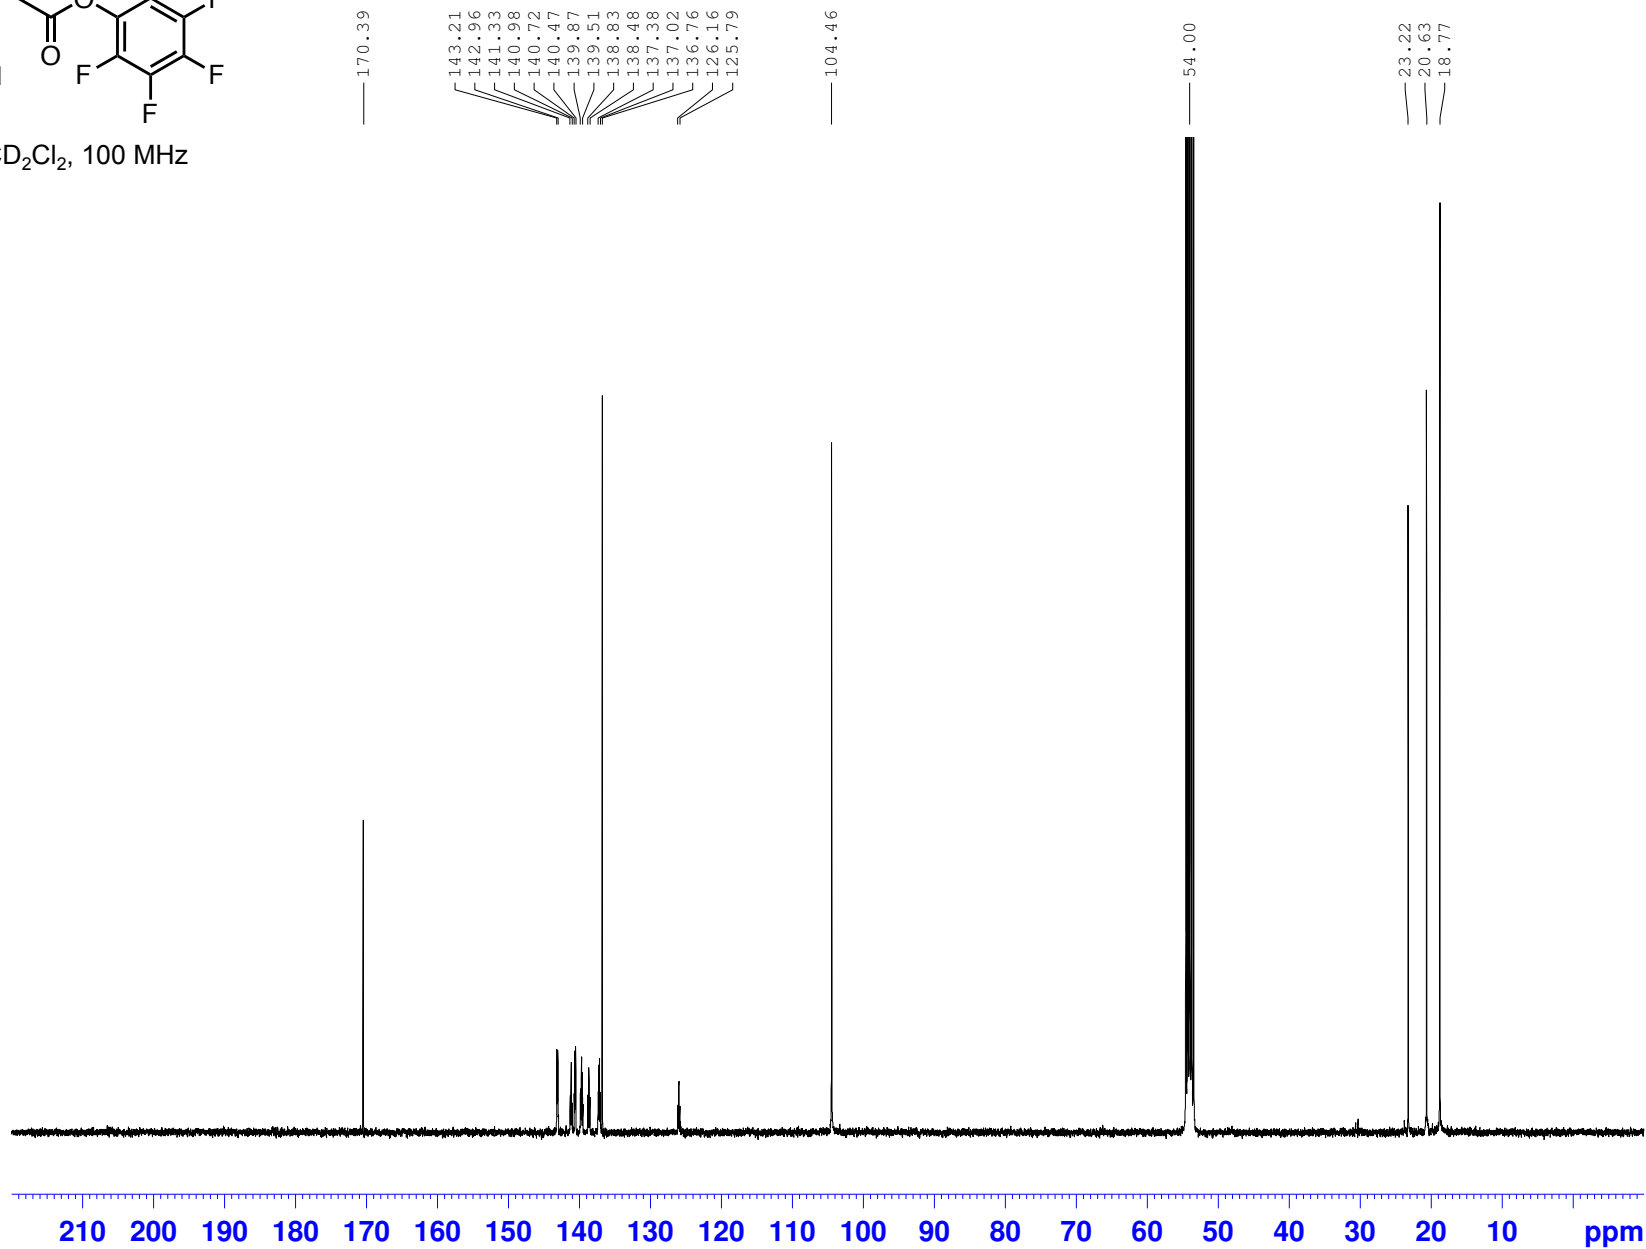

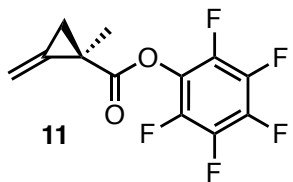

DEPT-135, CD<sub>2</sub>Cl<sub>2</sub>, 100 MHz

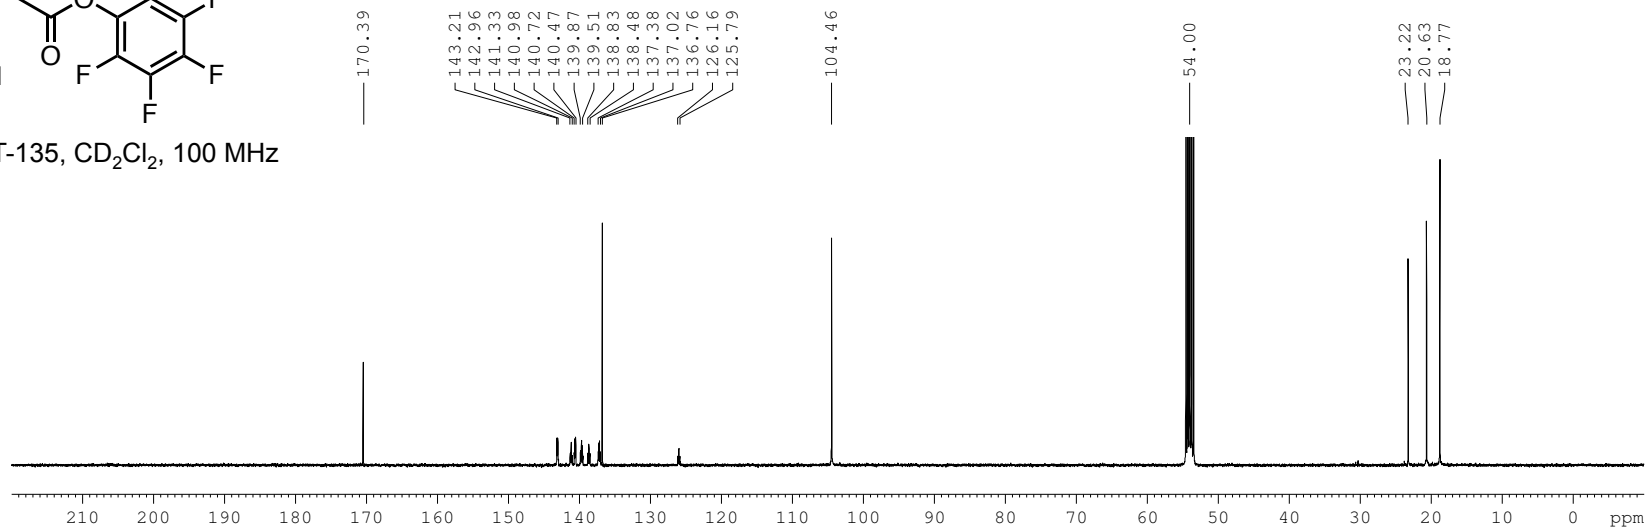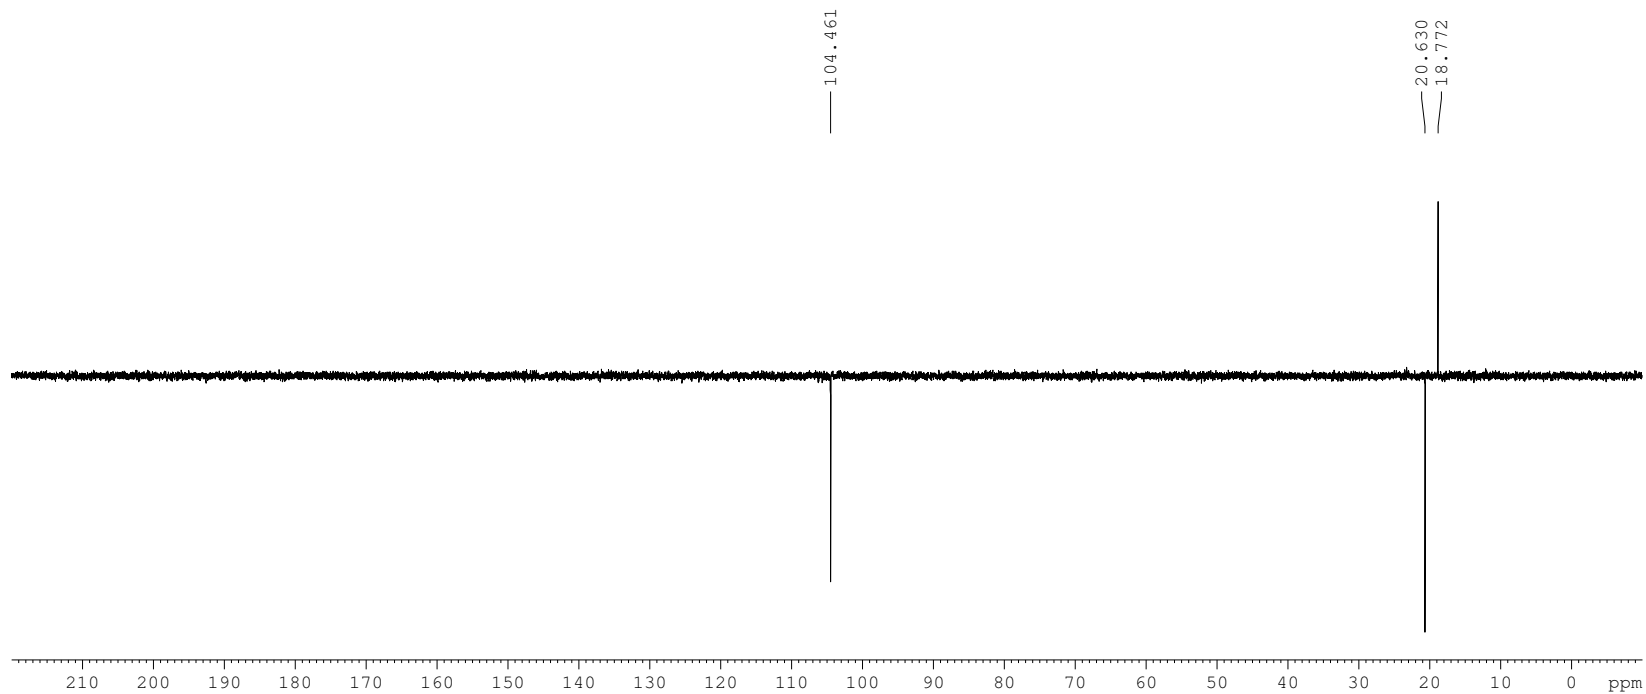



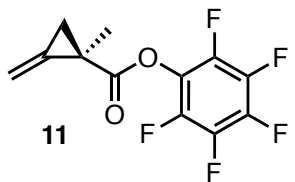

$^{19}\text{F}$ -NMR,  $\text{CD}_2\text{Cl}_2$ , 471 MHz

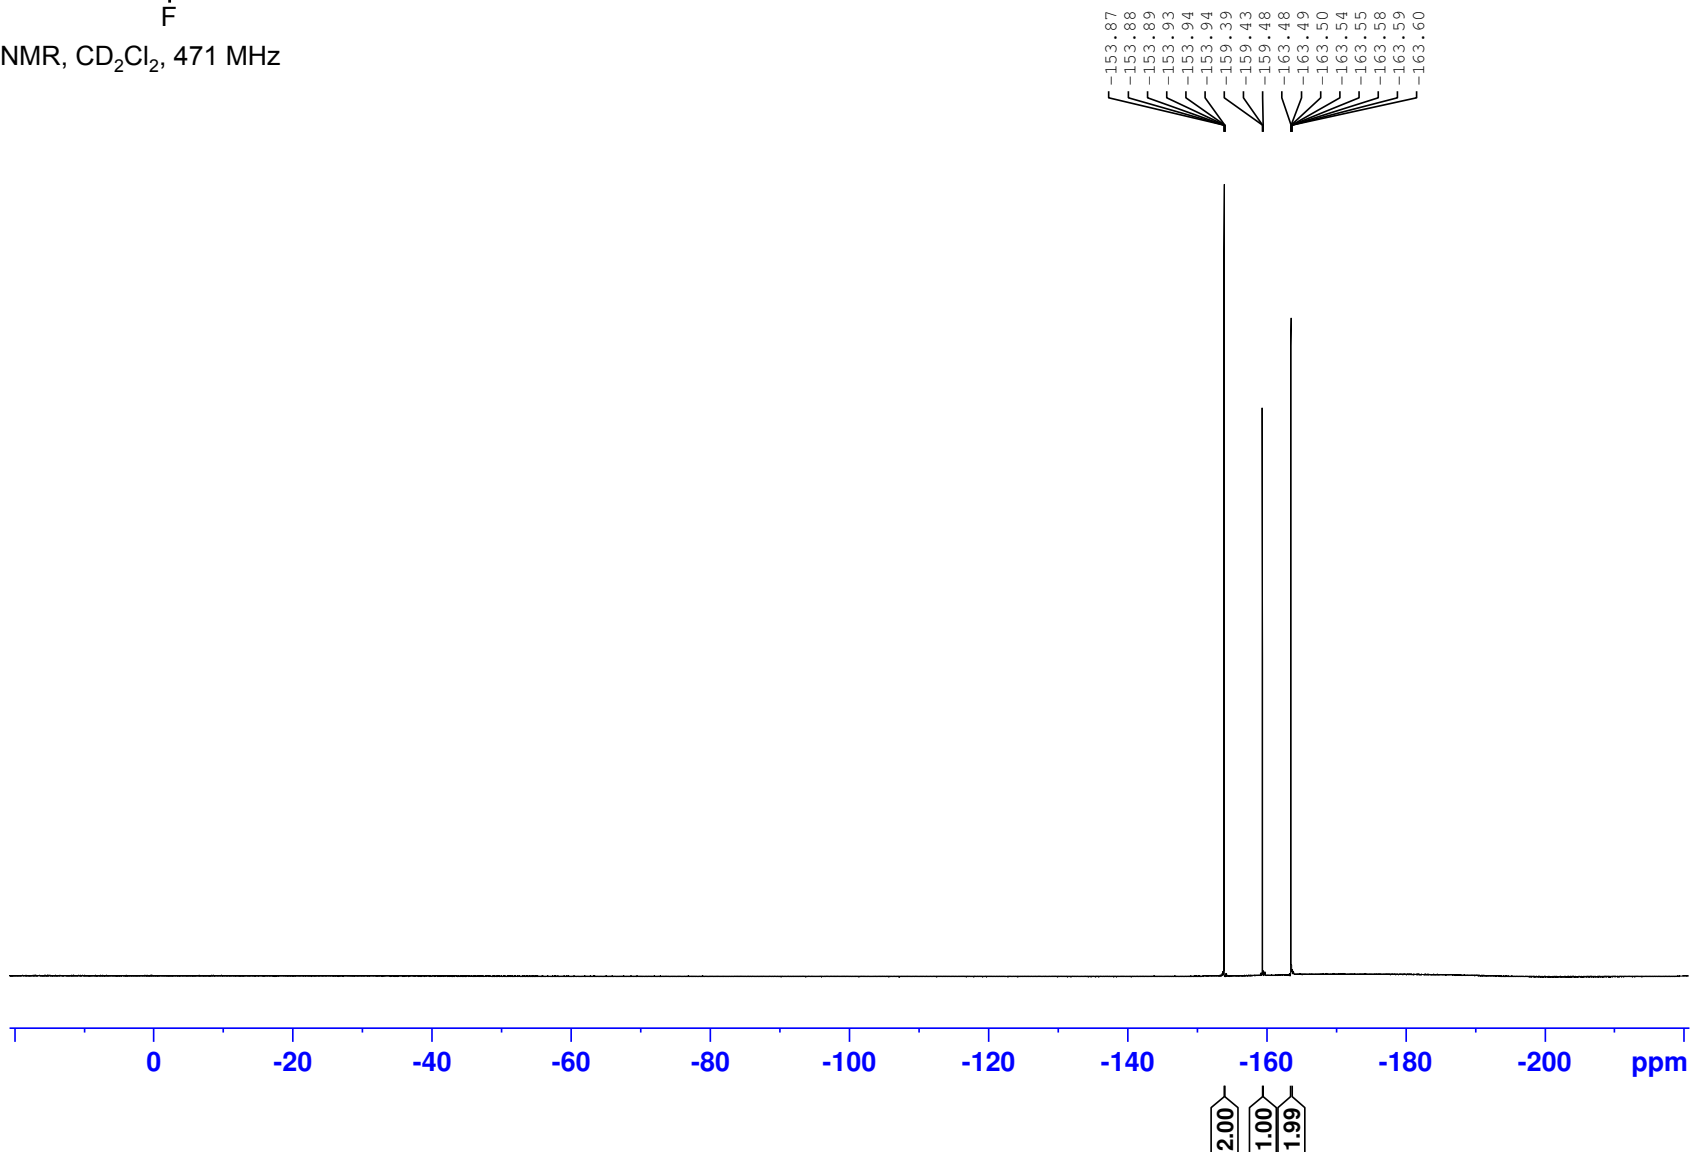

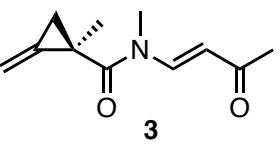

CDCl<sub>3</sub>, 400 MHz

8.380  
8.346

7.260

5.728  
5.707  
5.700  
5.693  
5.527

3.152  
2.289  
1.811  
1.805  
1.800  
1.787  
1.781  
1.776  
1.494  
1.343  
1.338  
1.332  
1.319  
1.314  
1.308

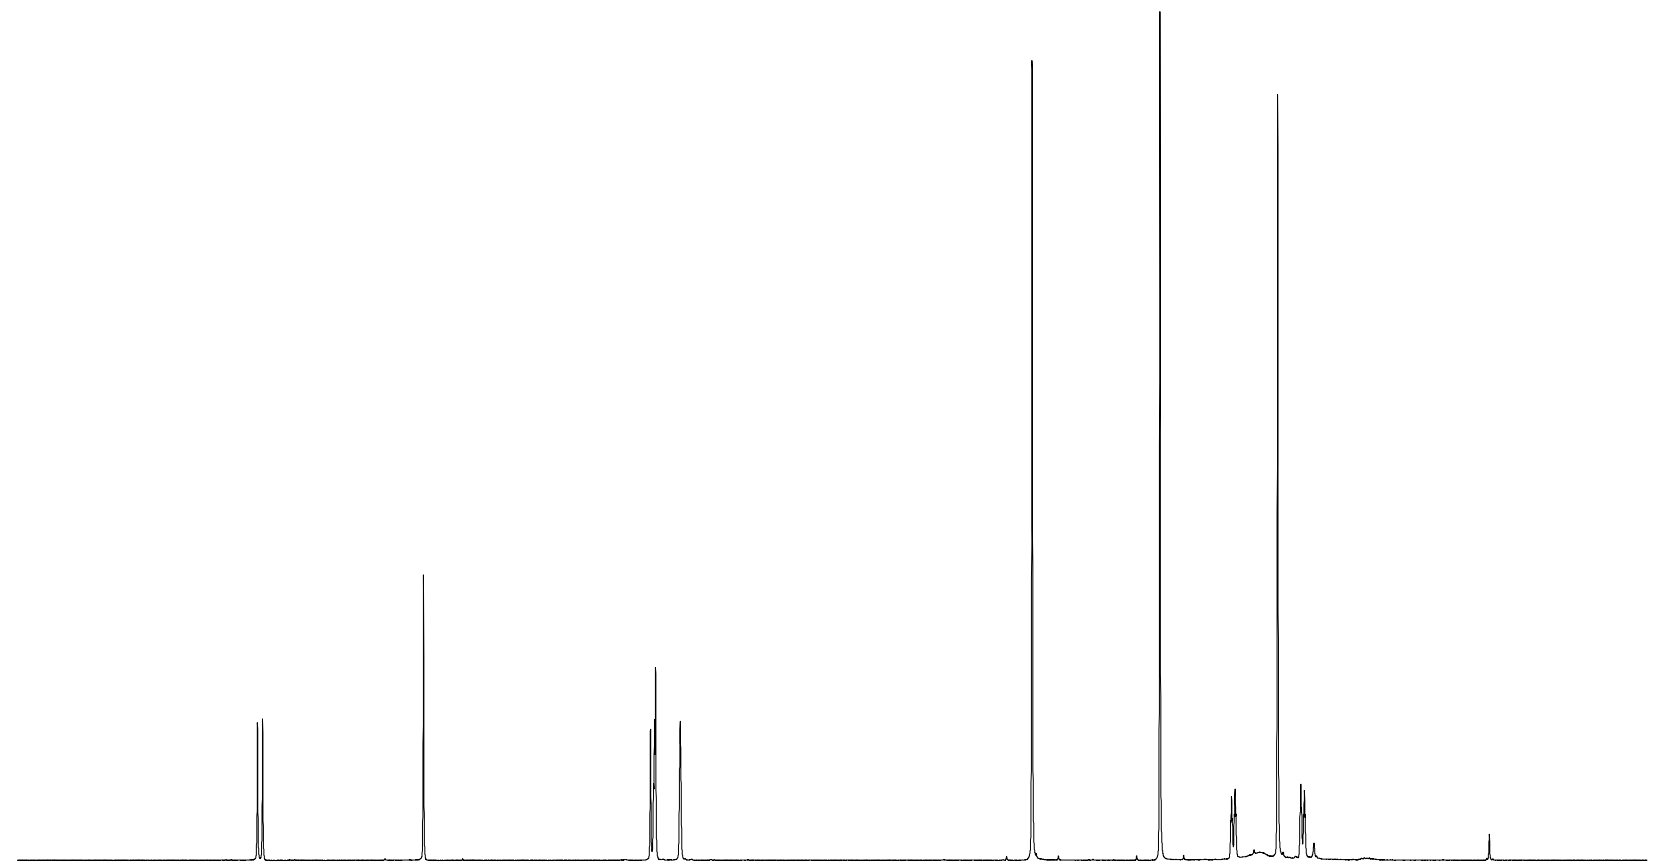

1.00

2.01  
1.01

3.07

3.06

1.08

3.12  
1.13

9 8 7 6 5 4 3 2 1 0 ppm

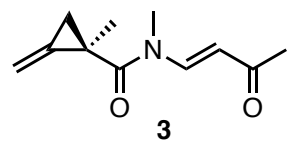

CDCl<sub>3</sub>, 125 MHz

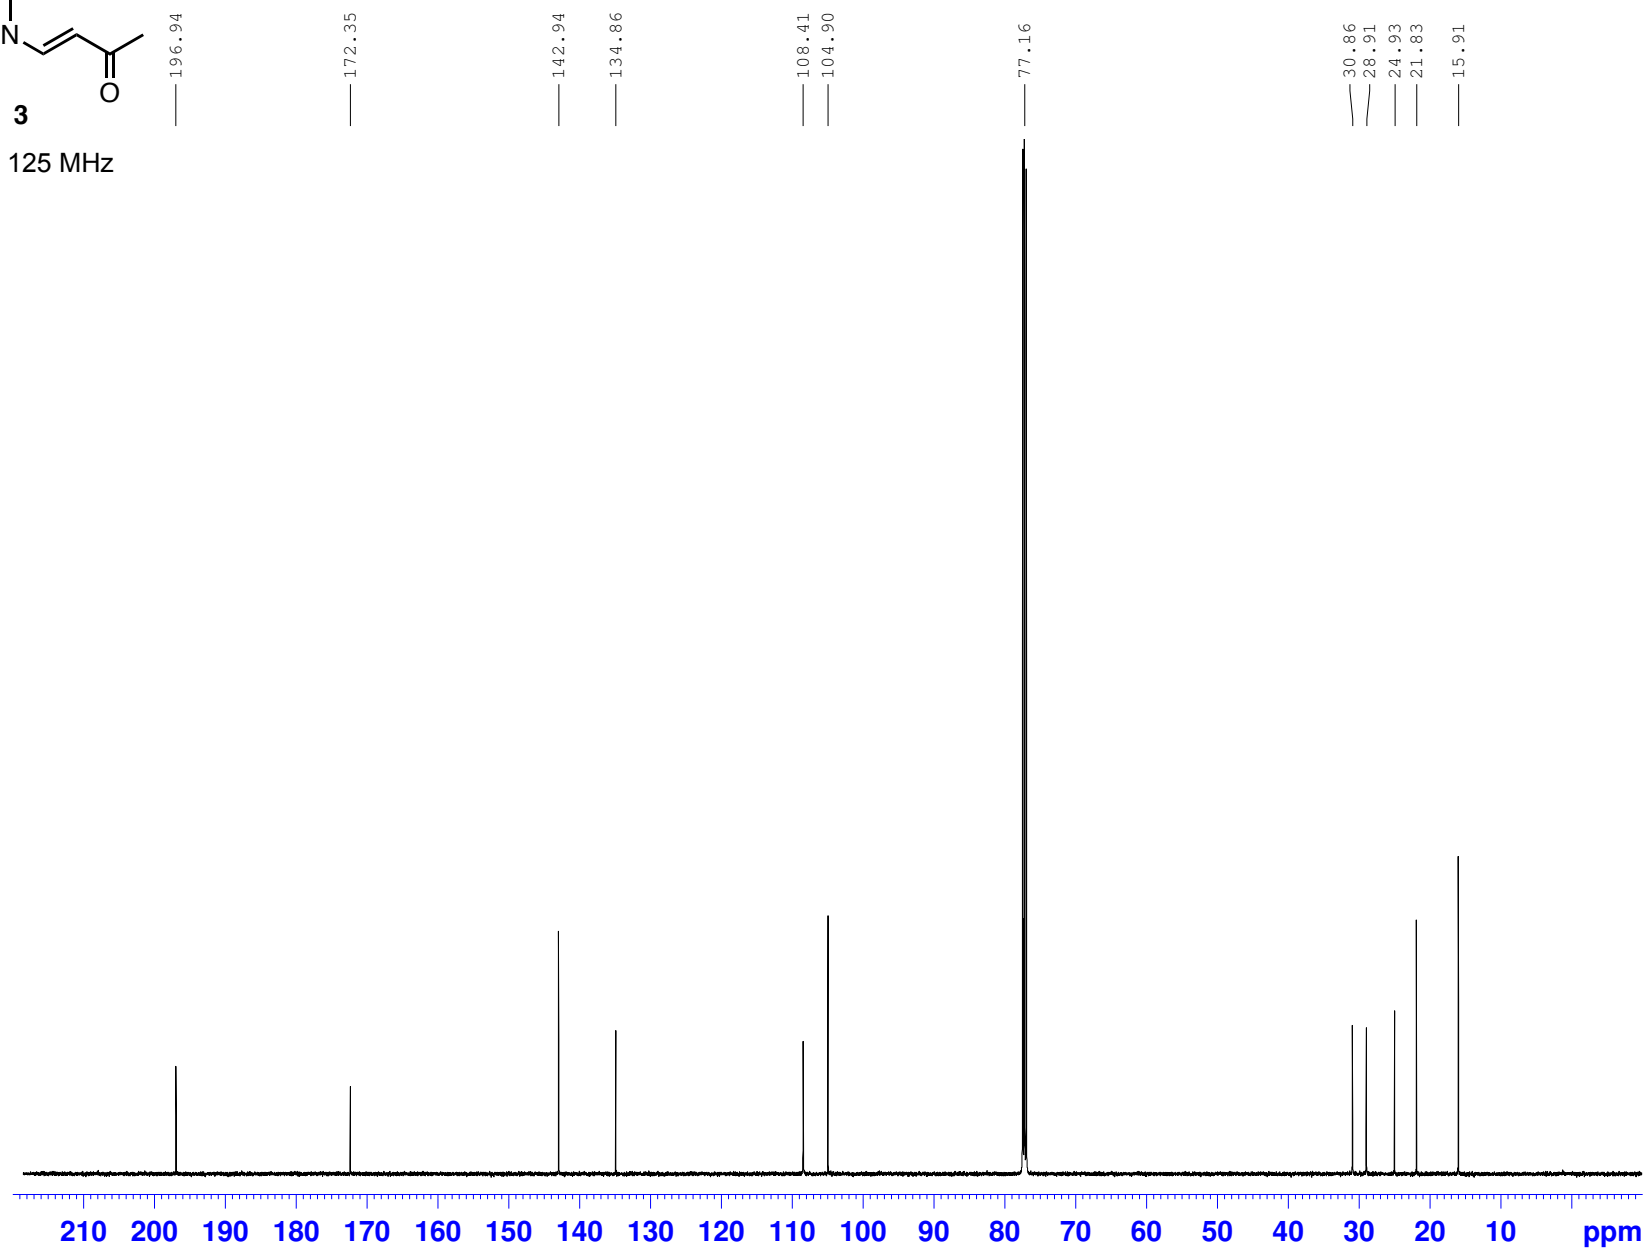

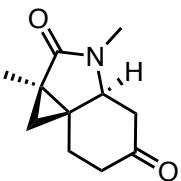

14

CDCl<sub>3</sub>, 300 MHz

7.260  
3.432  
3.419  
3.389  
3.375  
2.832  
2.828  
2.819  
2.814  
2.787  
2.783  
2.774  
2.769  
2.724  
2.712  
2.707  
2.660  
2.590  
2.566  
2.550  
2.539  
2.526  
2.515  
2.499  
2.474  
2.392  
2.347  
2.303  
2.179  
2.167  
2.162  
2.139  
2.122  
2.100  
2.095  
2.082  
2.078  
1.752  
1.746  
1.728  
1.722  
1.708  
1.702  
1.684  
1.678  
1.601  
1.376  
0.952  
0.940  
0.664  
0.651

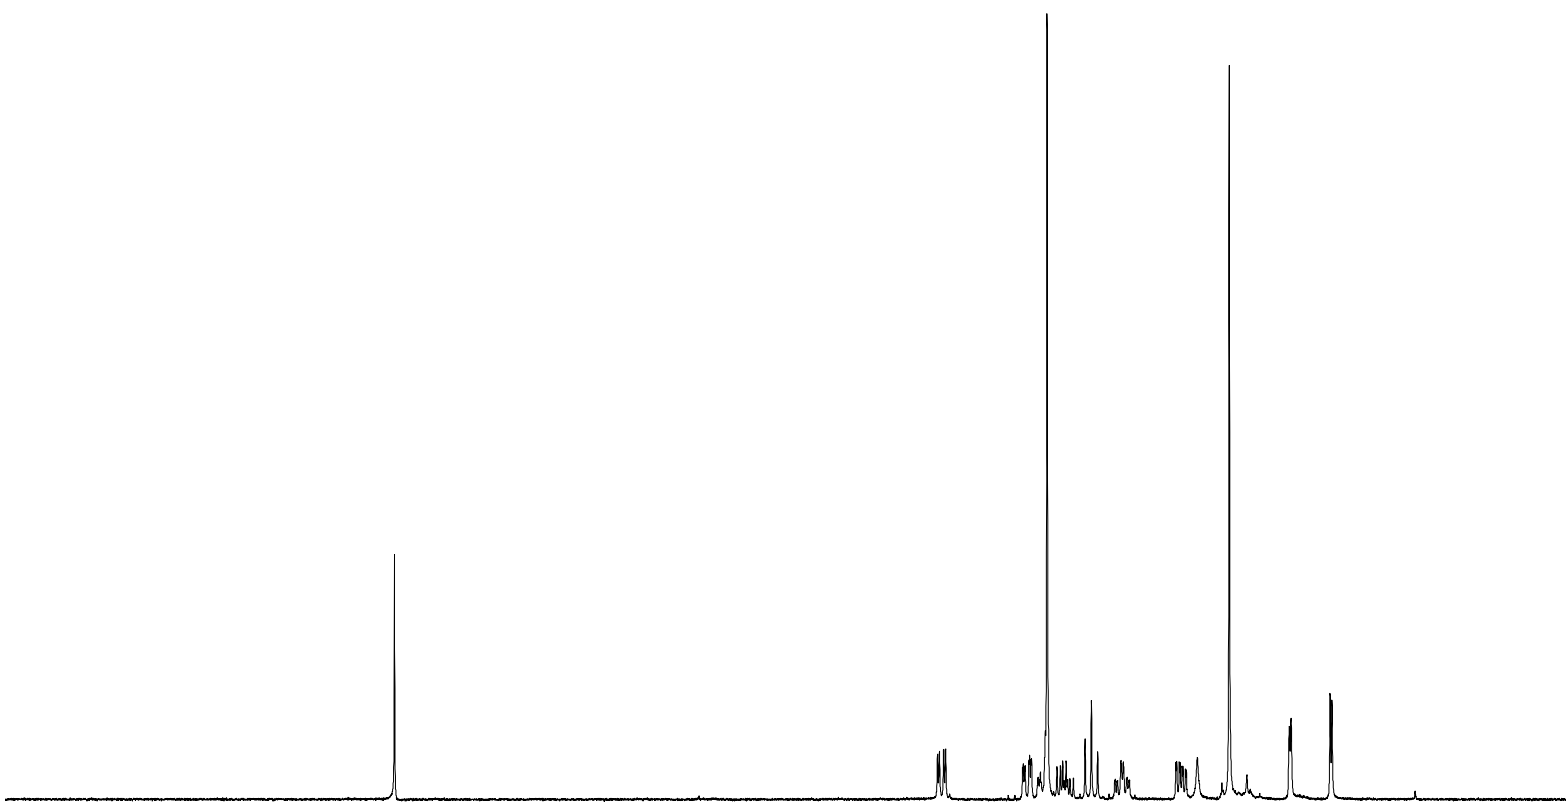

9 8 7 6 5 4 3 2 1 0 ppm

1.00  
0.99  
4.04  
1.09  
1.08  
1.08  
1.03  
3.13  
1.01  
1.03

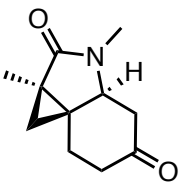

**14**

CDCl<sub>3</sub>, 100 MHz

— 207.55

— 178.85

— 77.16

— 60.12

— 45.06

— 41.52

— 31.80

— 30.66

— 27.17

— 25.84

— 22.73

— 10.95

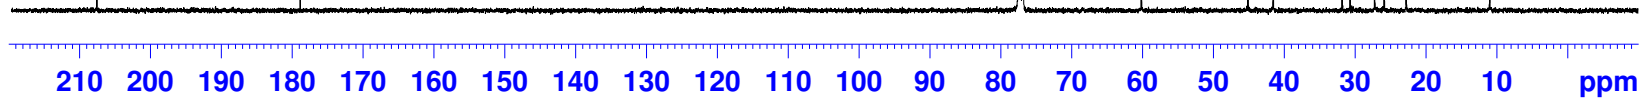

Figure 1. ketone **14**, HSQC (CDCl<sub>3</sub>, 500 MHz)

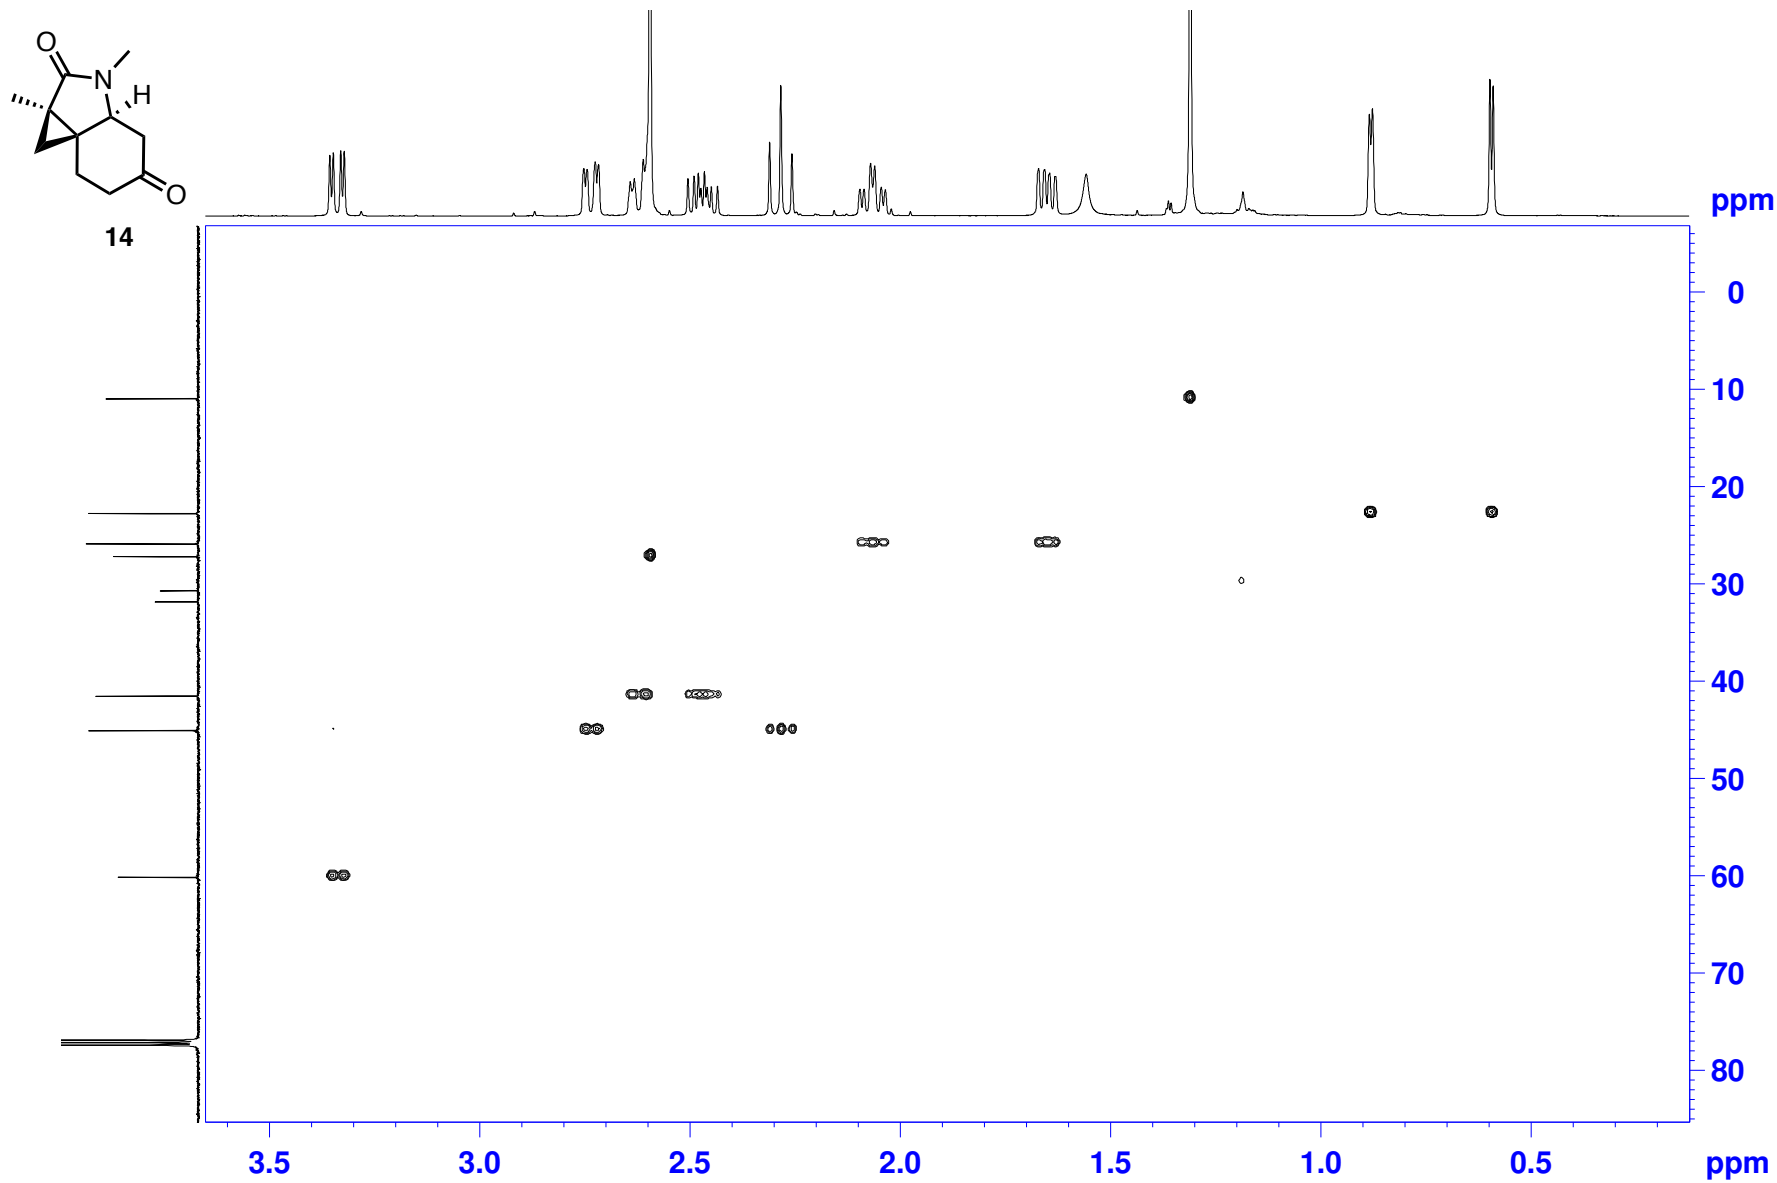

Figure 2. ketone **14**, COSY, (CDCl<sub>3</sub>, 500 MHz)

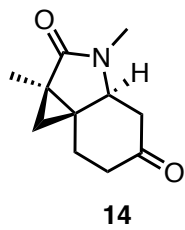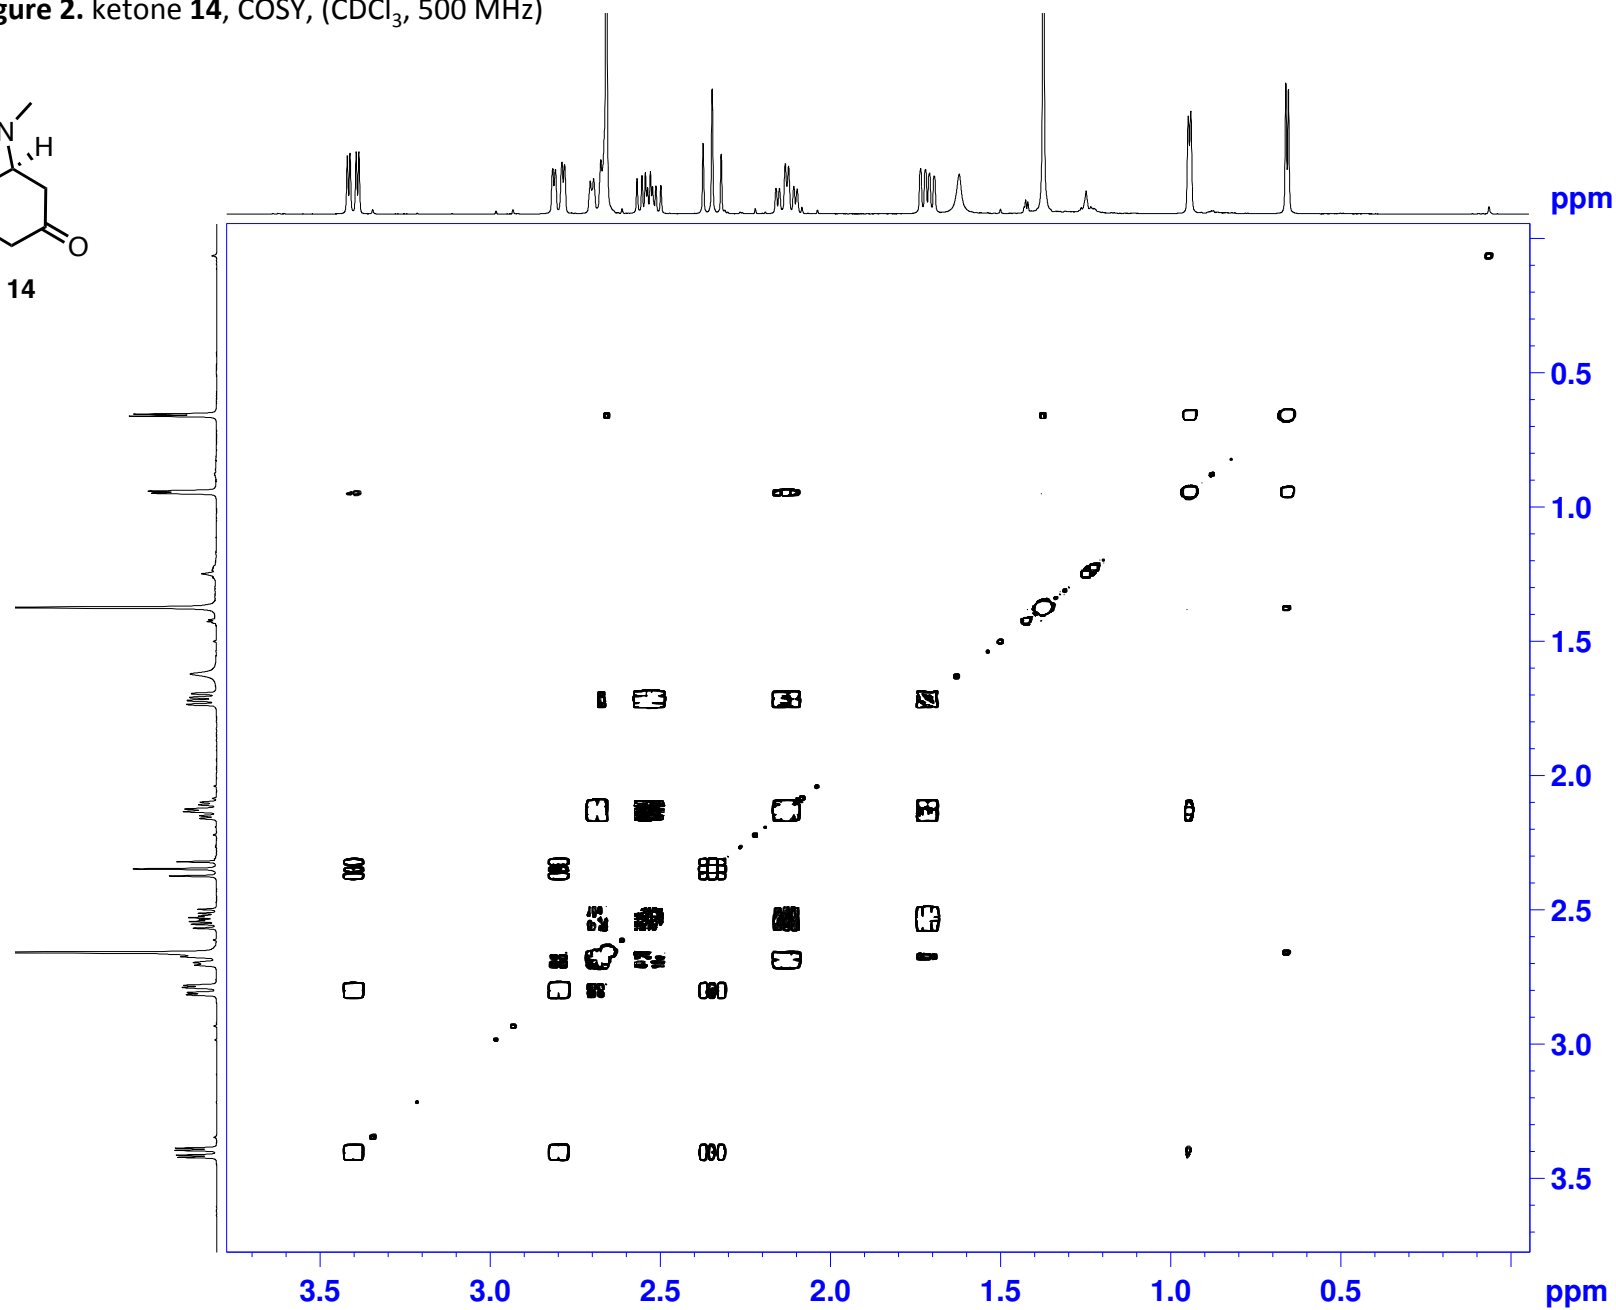

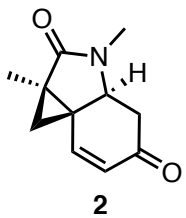

CDCl<sub>3</sub>, 500 MHz

7.260  
6.981  
6.962

6.149  
6.130

3.827  
3.820  
3.800  
3.792  
2.917  
2.909  
2.886  
2.878  
2.709  
2.466  
2.438  
2.435  
2.406  
1.463  
1.337  
1.329  
0.859  
0.851

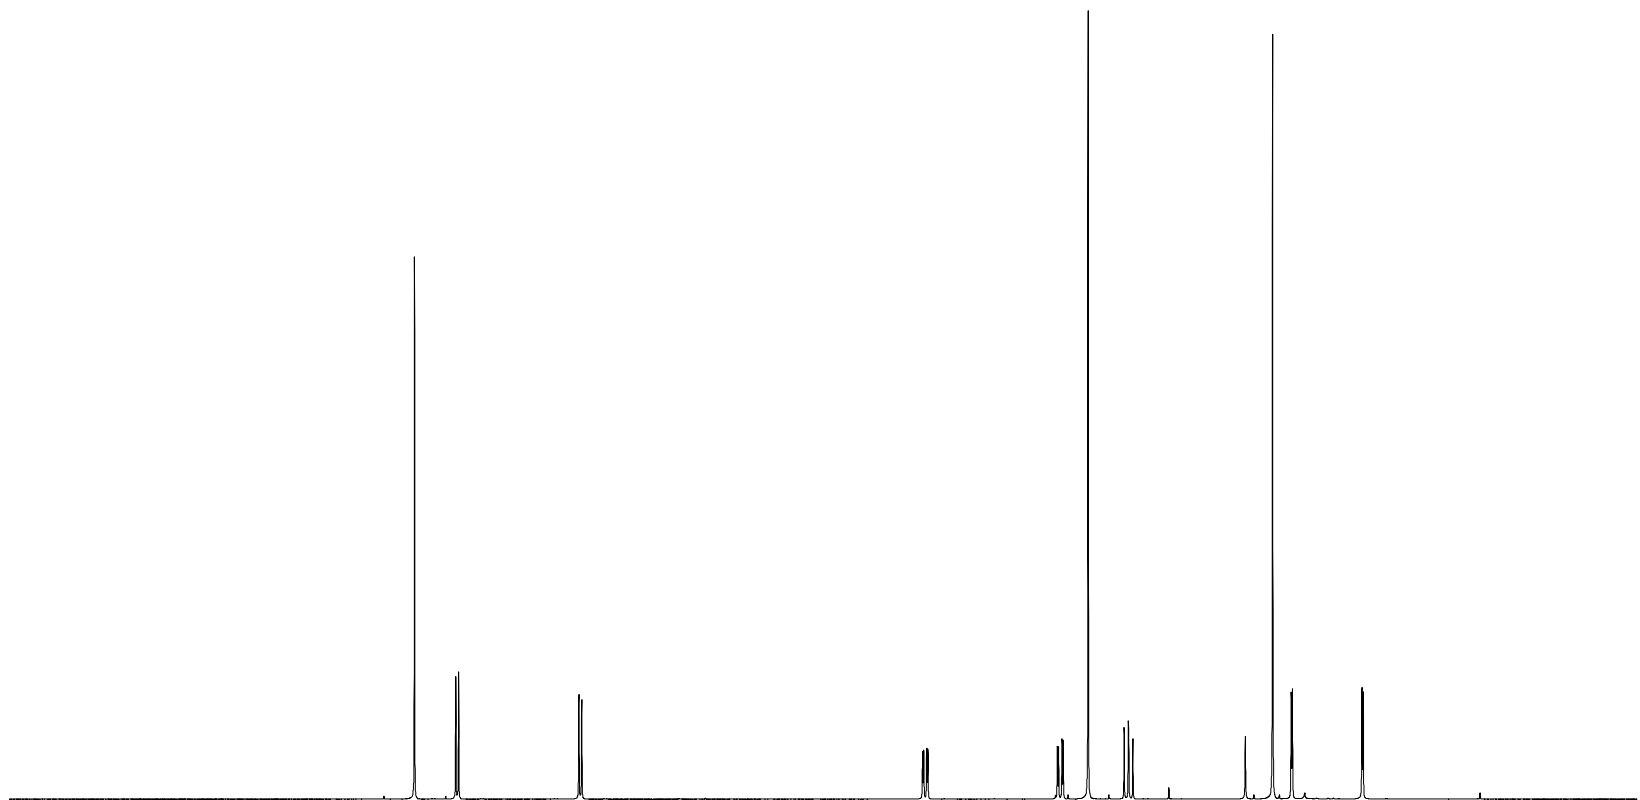

9

8

1.00

0.98

5

4

1.01

1.08

3.13

1.06

2

3.18

1.08

1.08

1

0

ppm



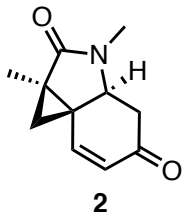

CDCl<sub>3</sub>, 125 MHz

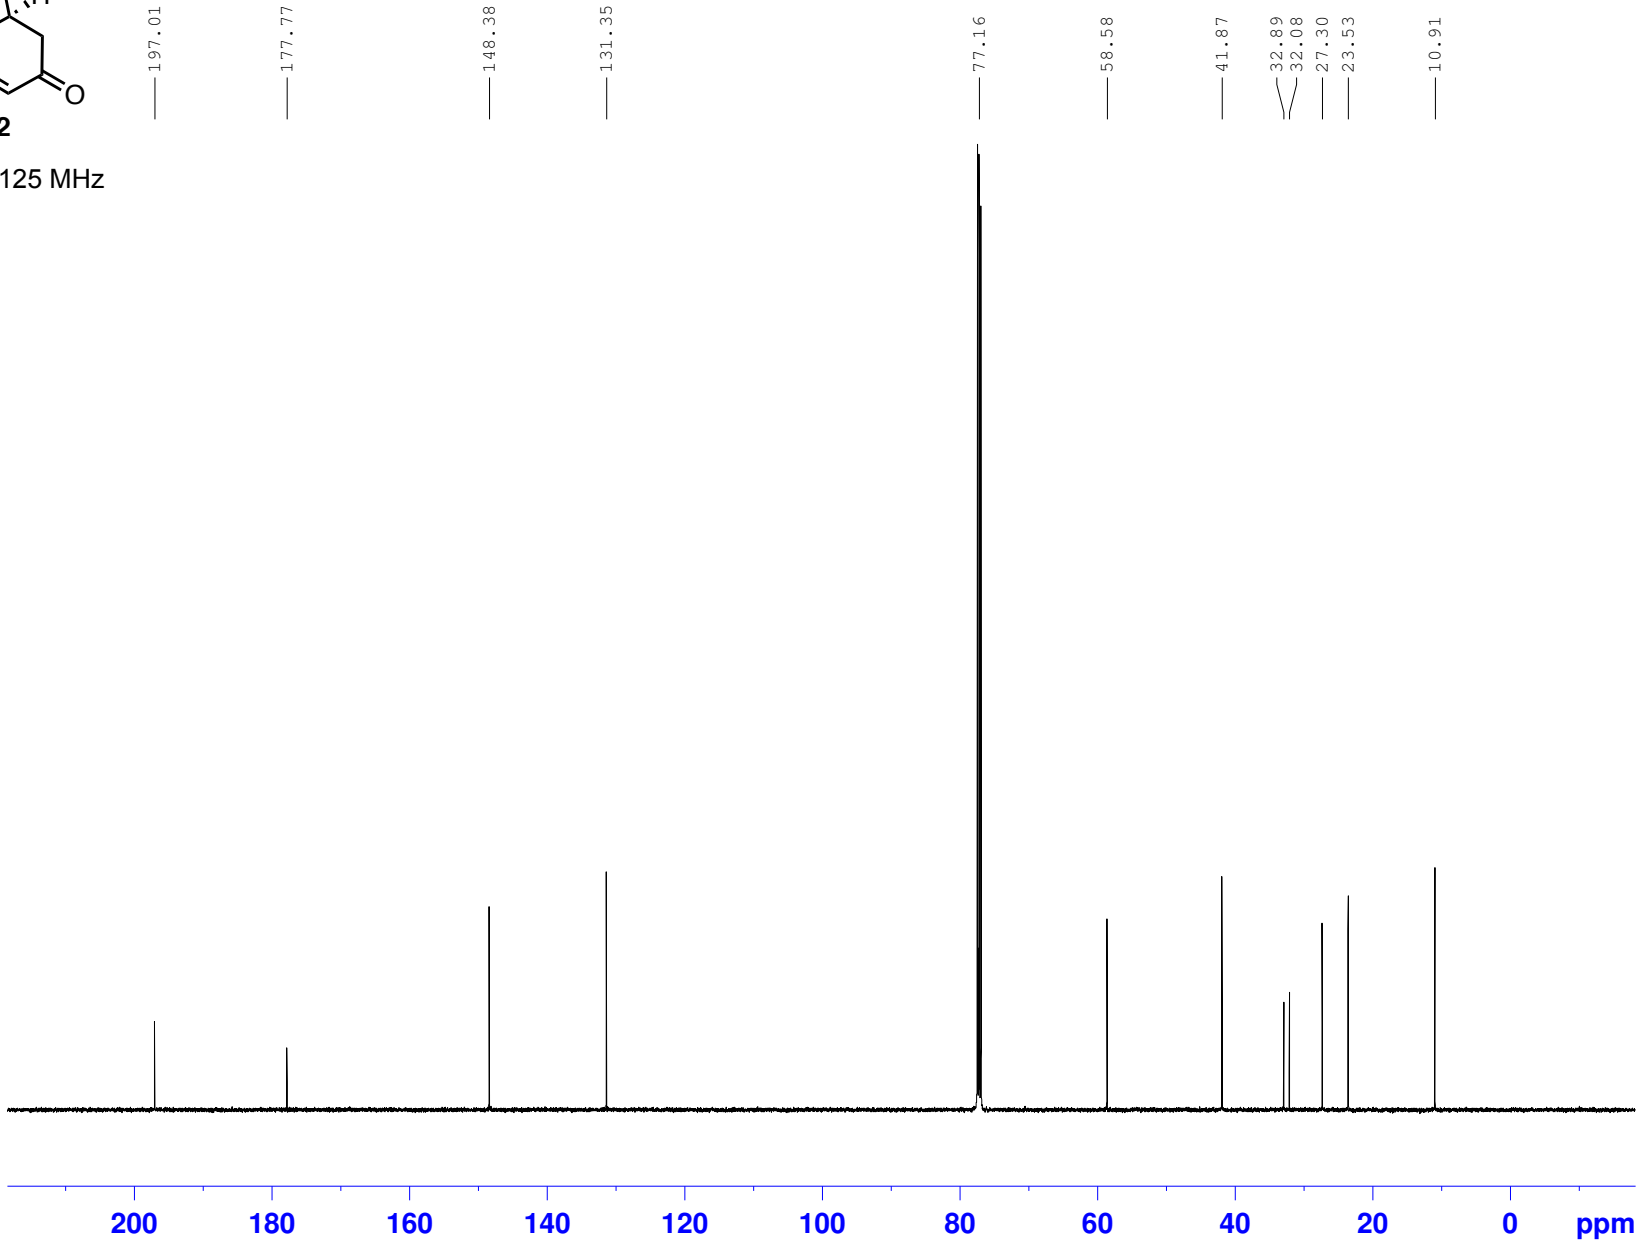

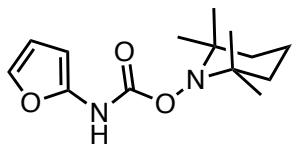

S2

CDCl<sub>3</sub>, 500 MHz

— 9.003

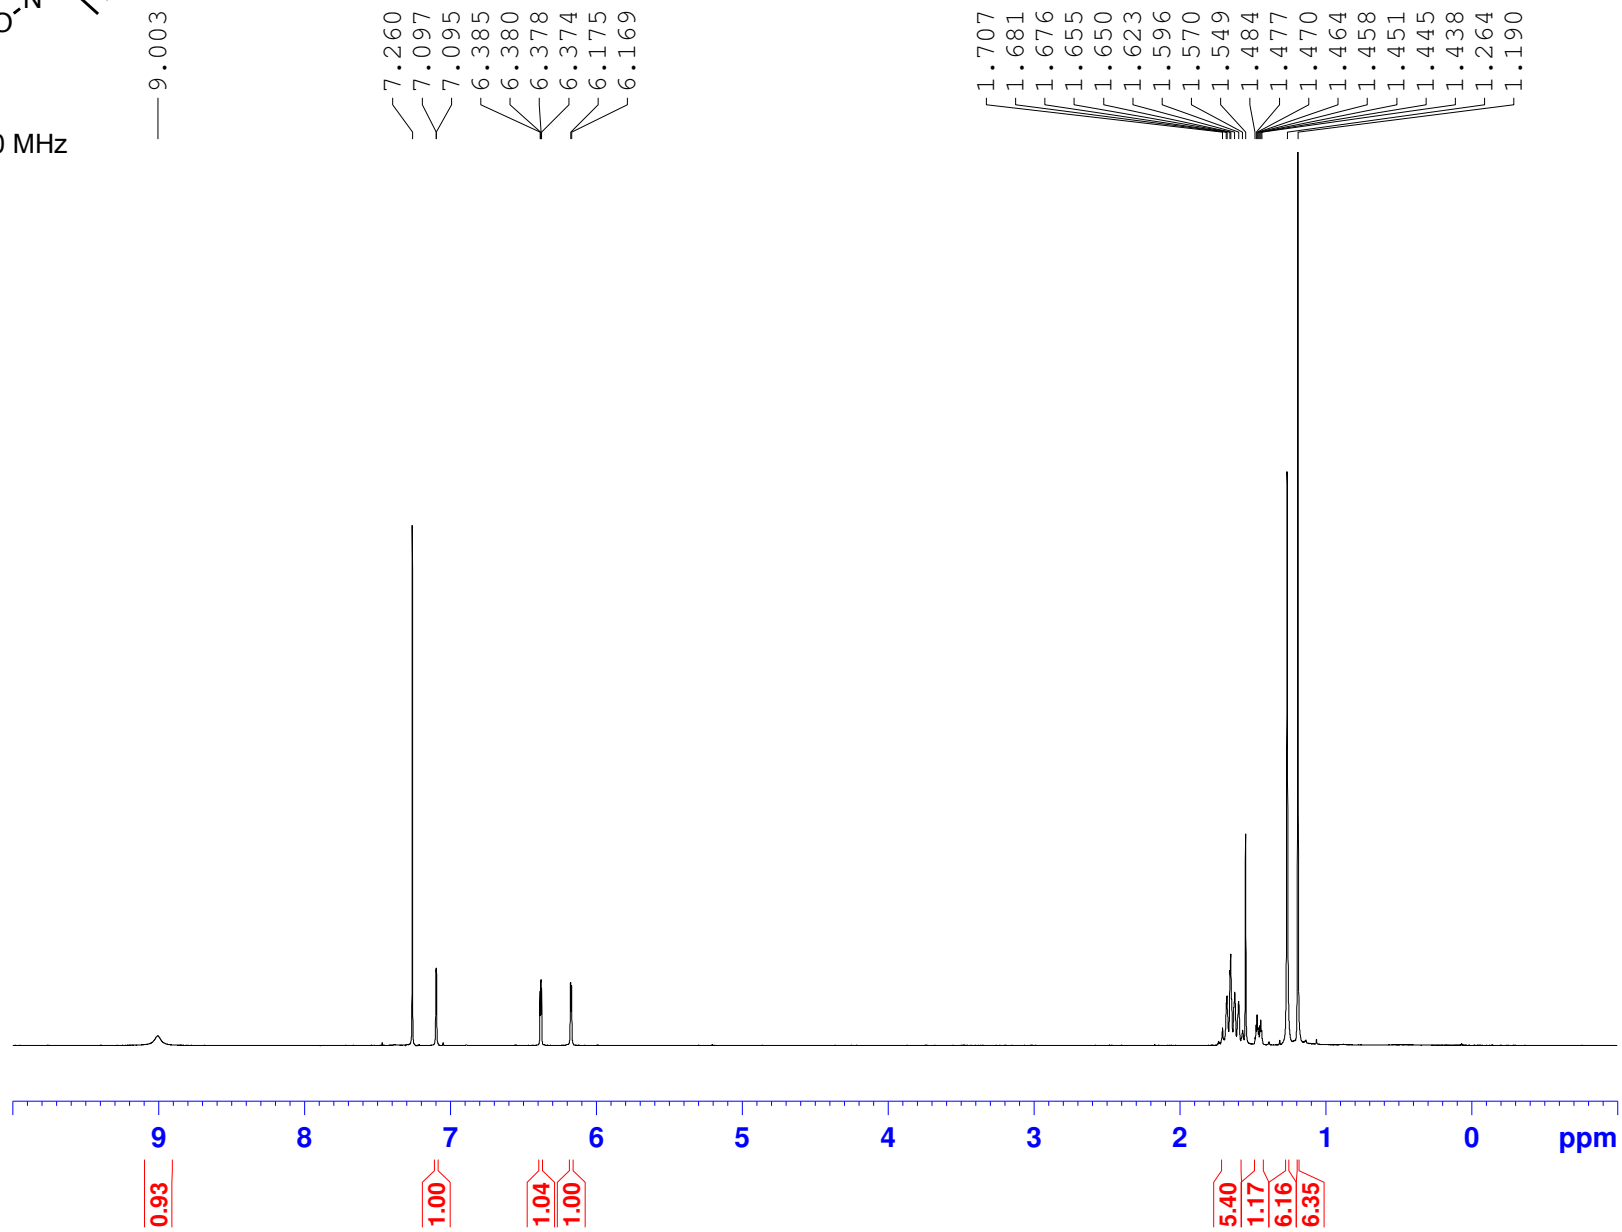

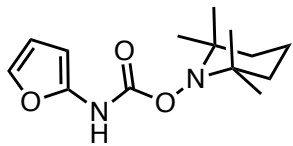

S2

CDCl<sub>3</sub>, 125 MHz

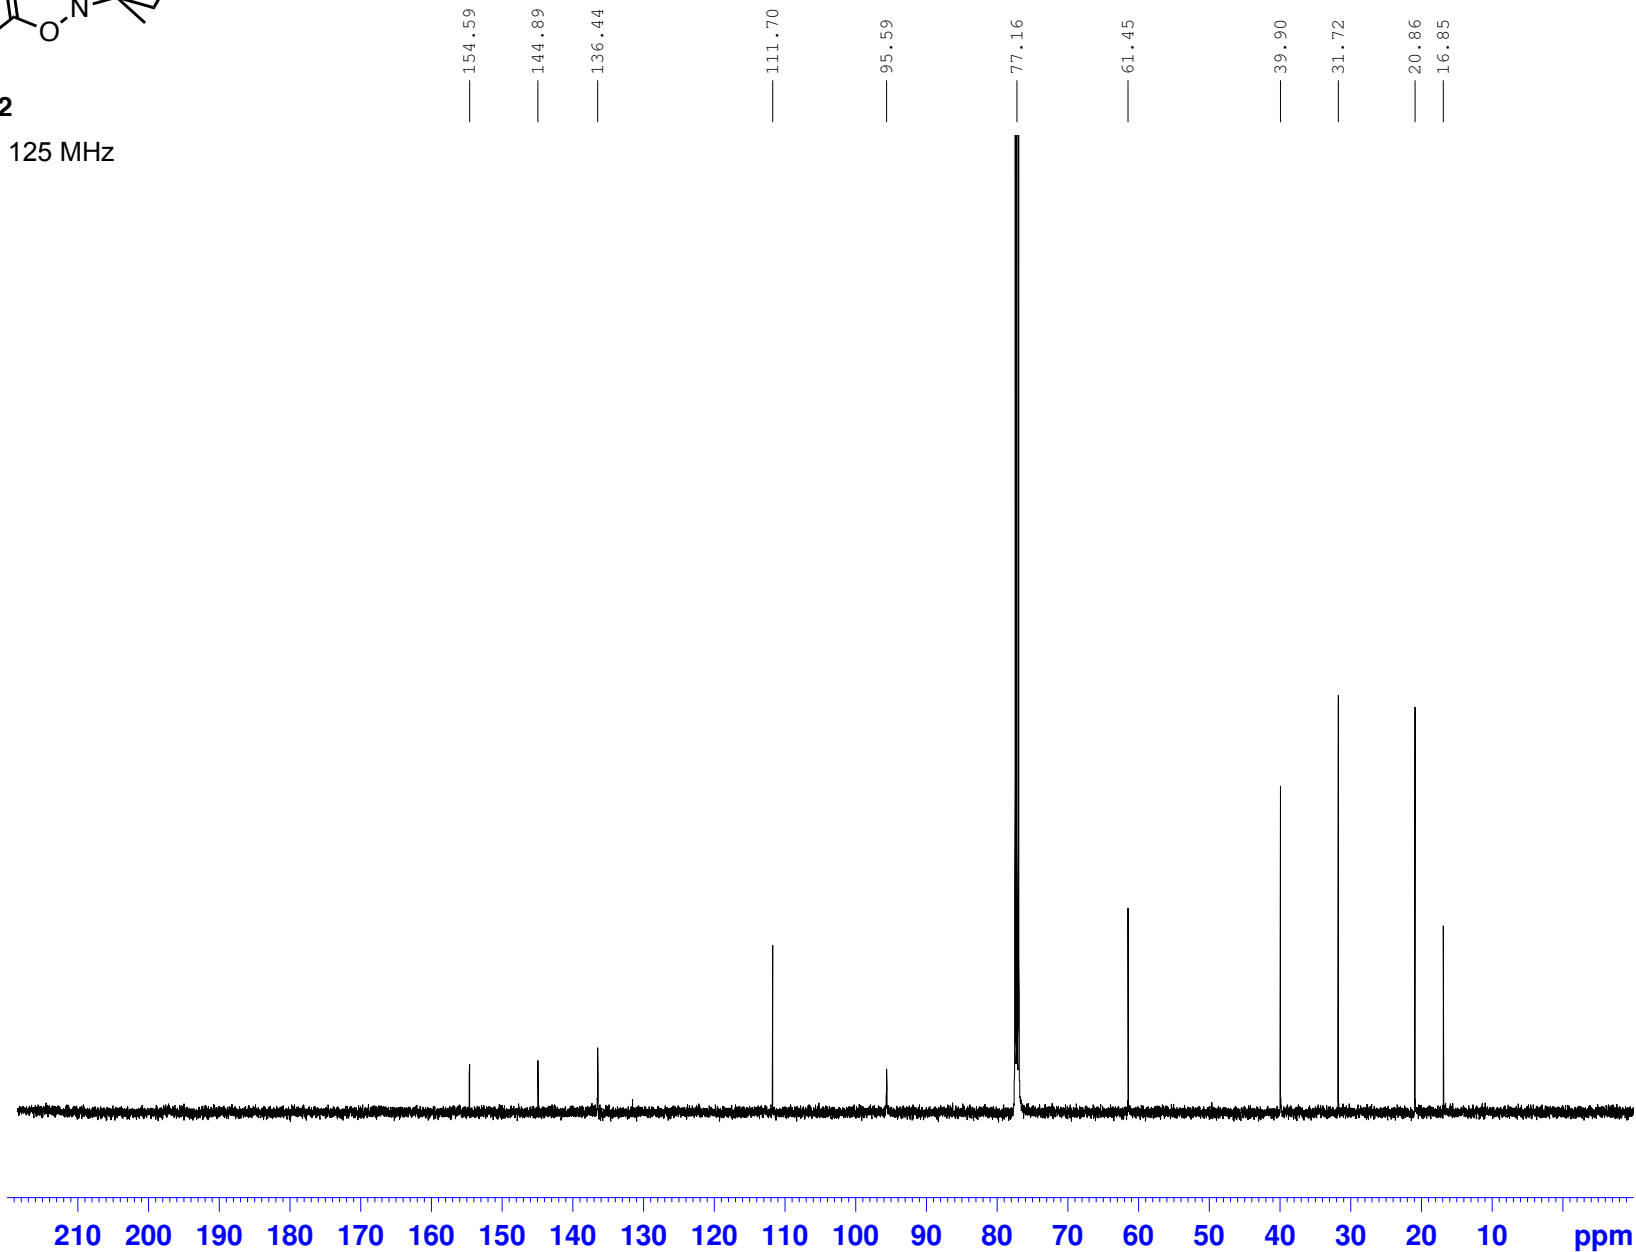

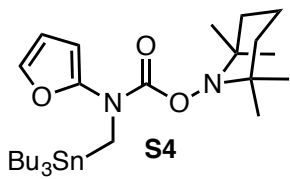

C<sub>6</sub>D<sub>6</sub>, 400 MHz

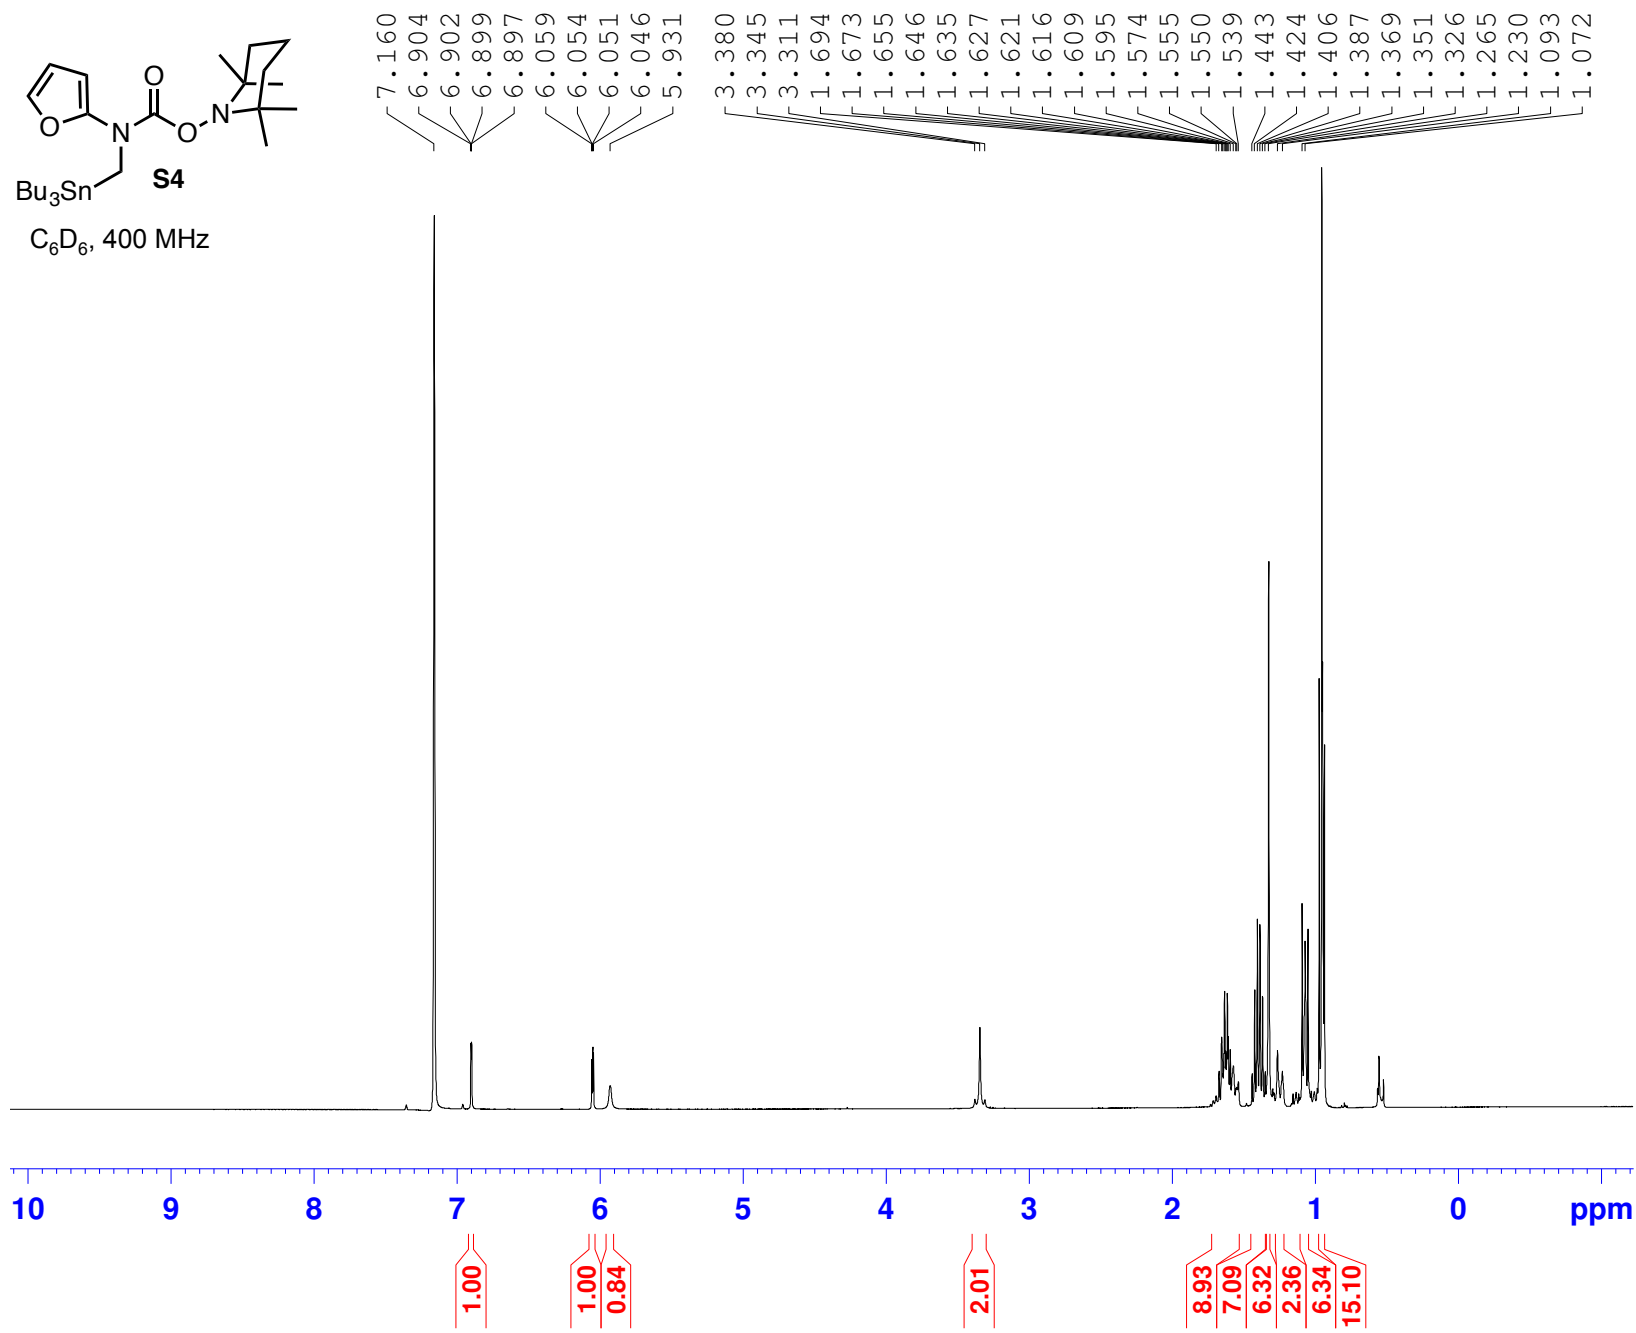

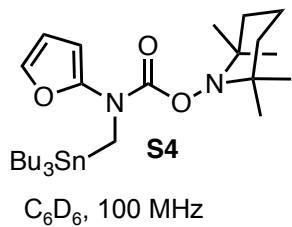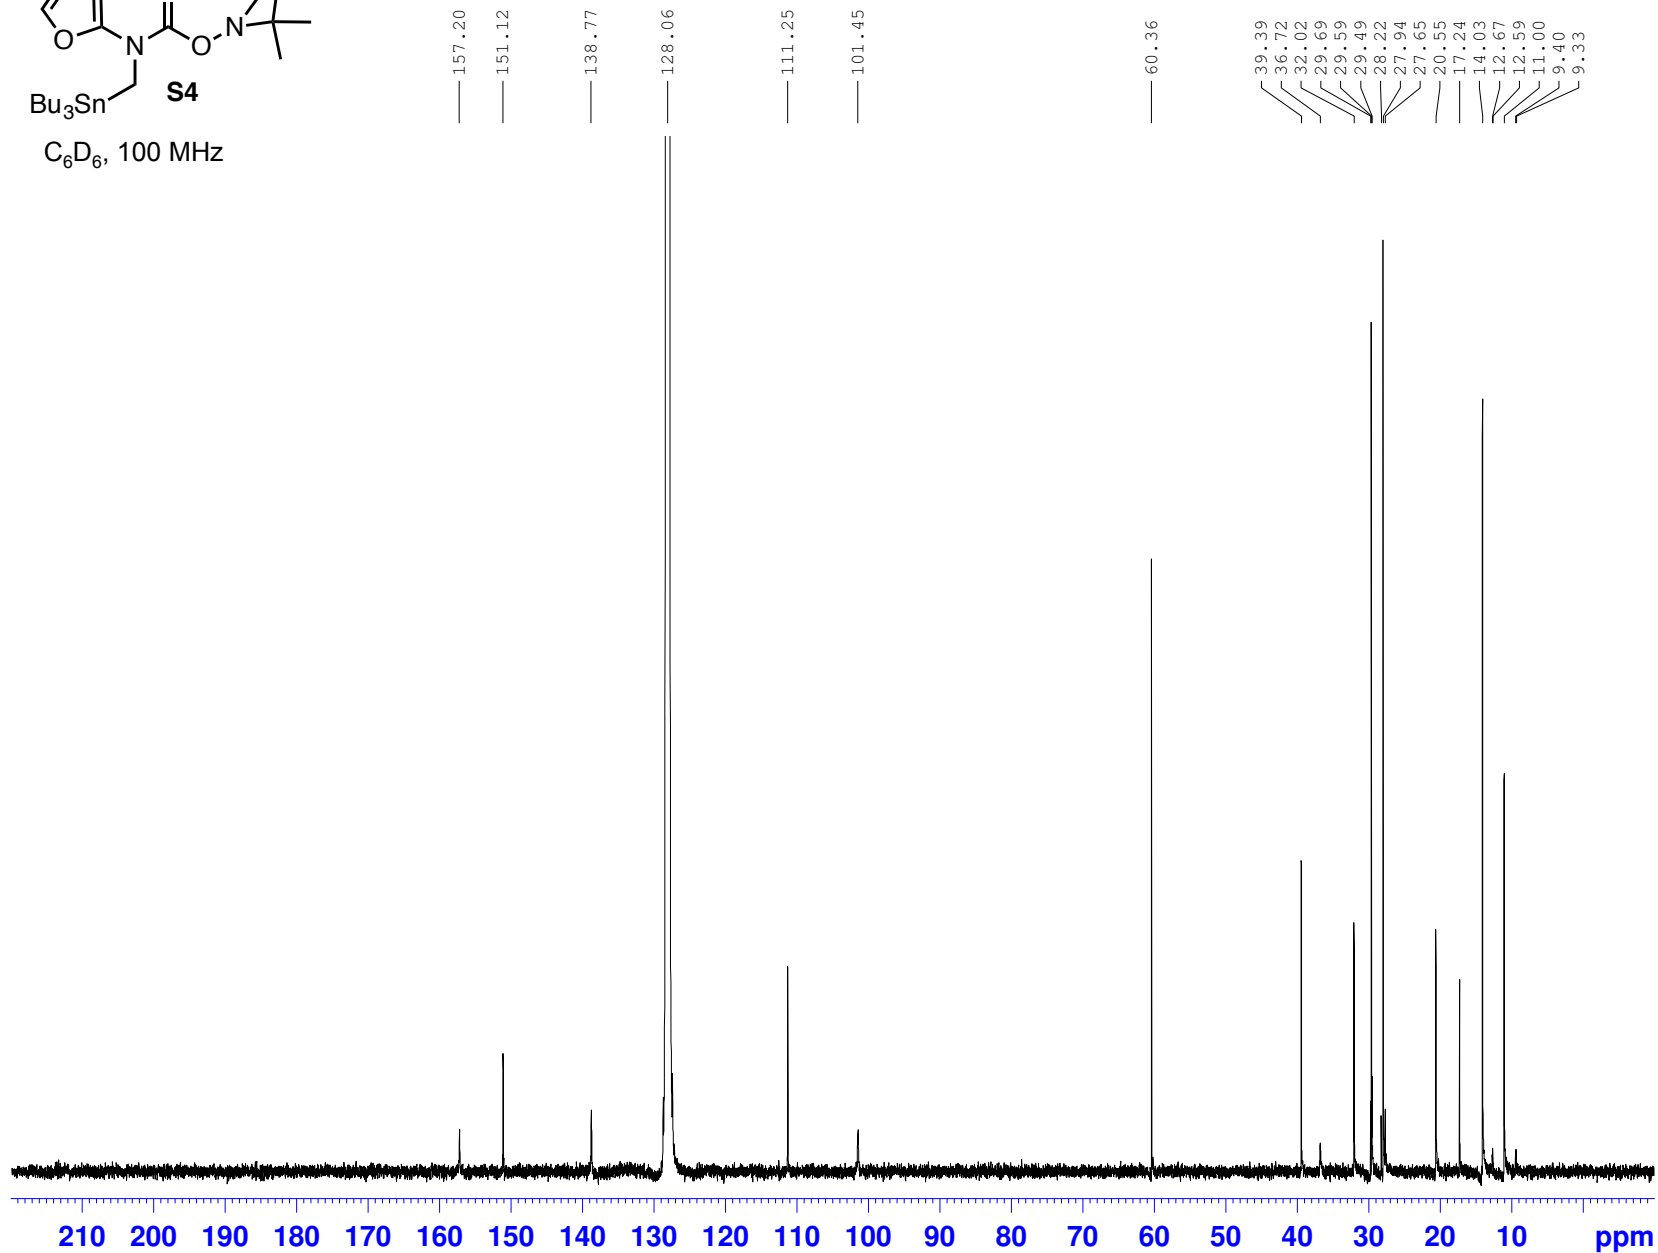

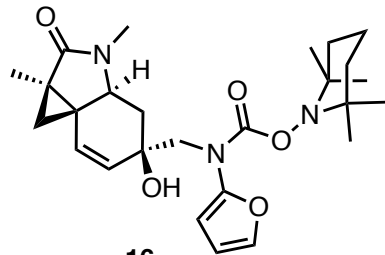

C<sub>6</sub>D<sub>6</sub>, 400 MHz

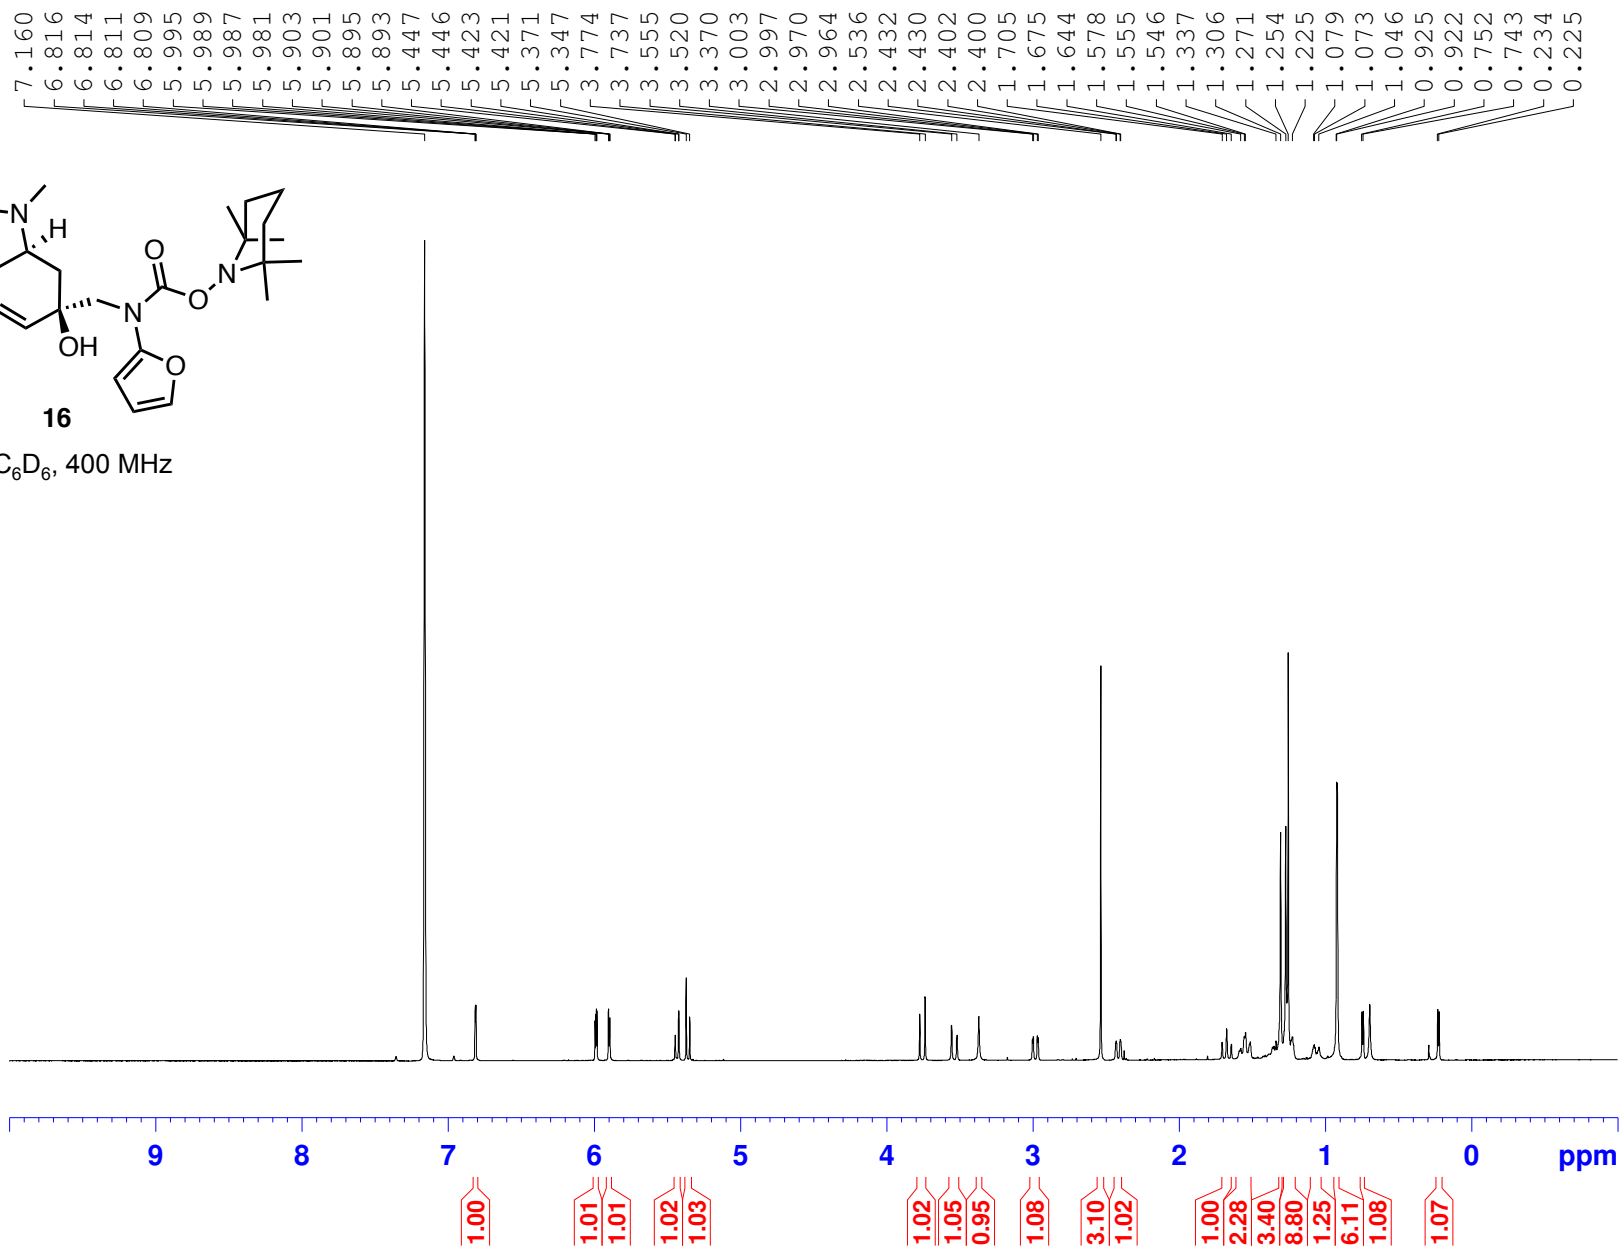

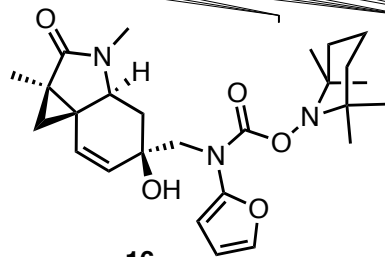

CDCl<sub>3</sub>, 400 MHz

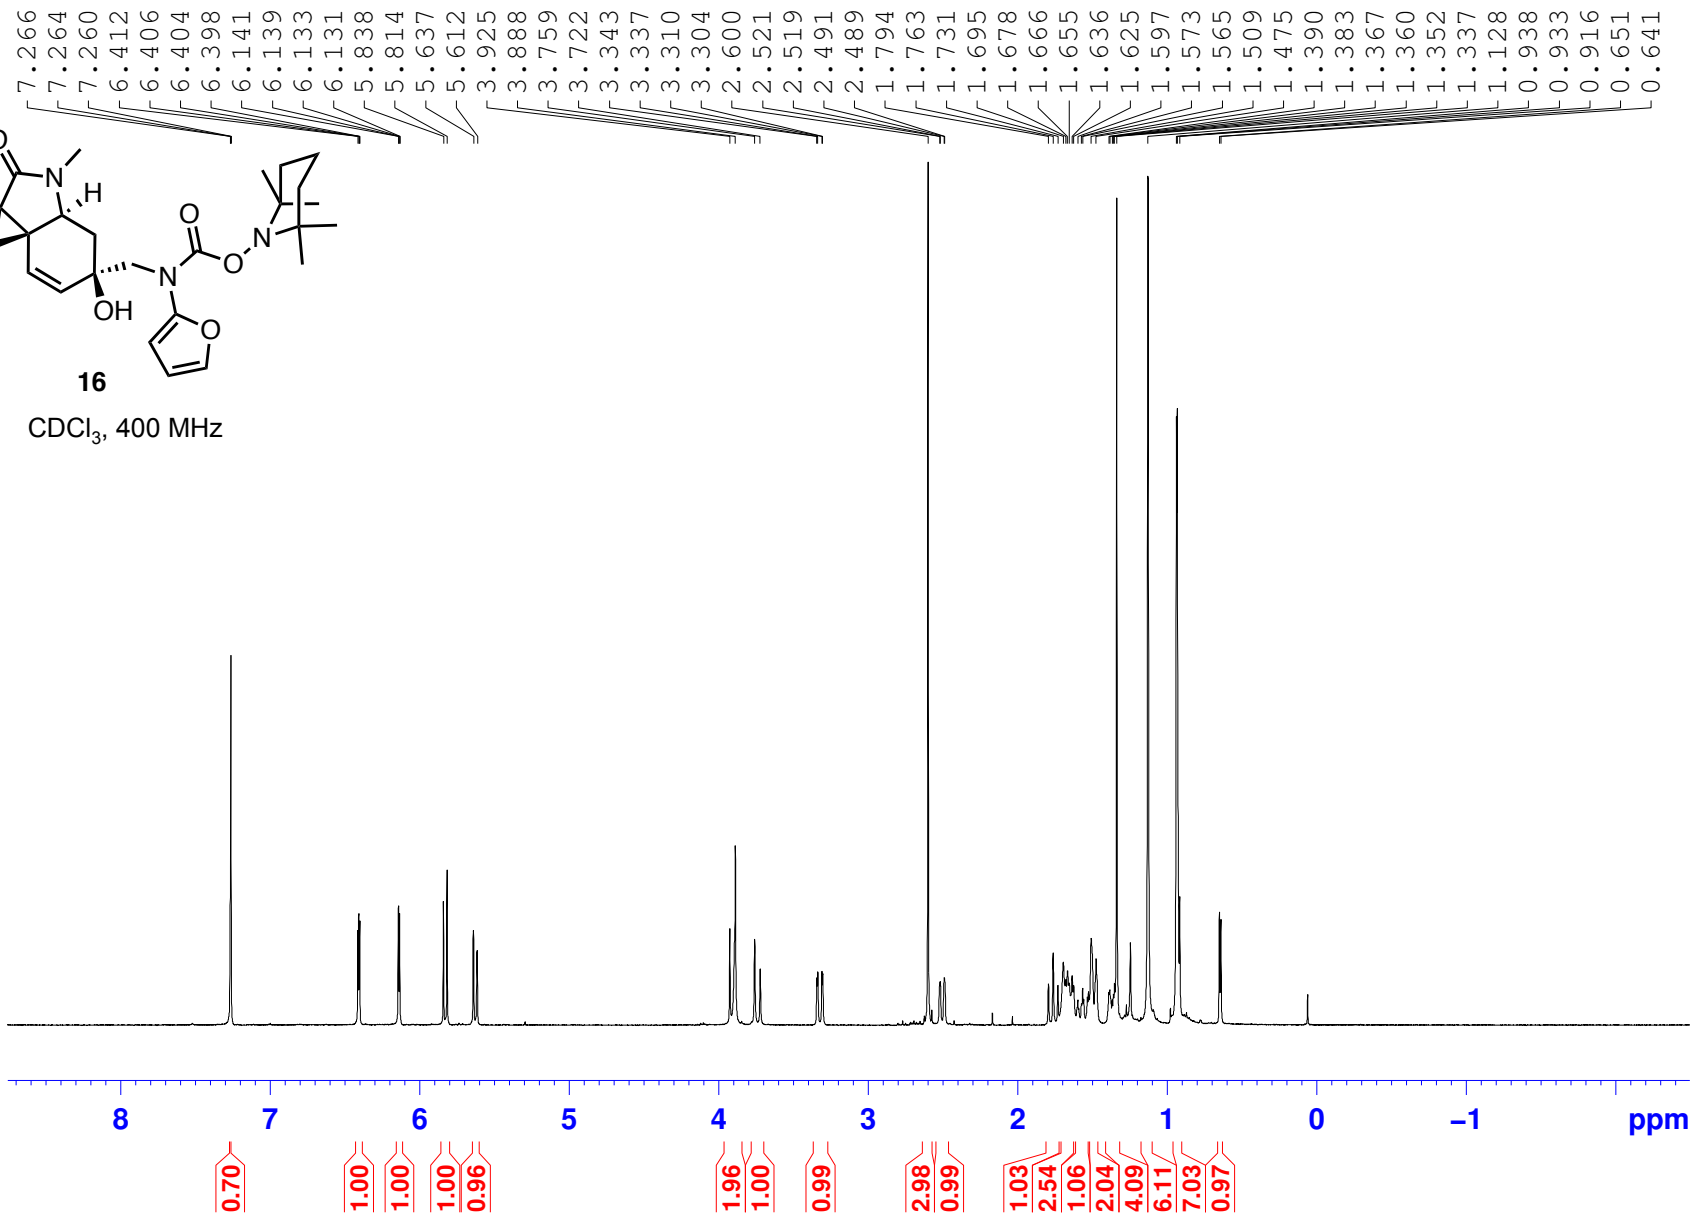

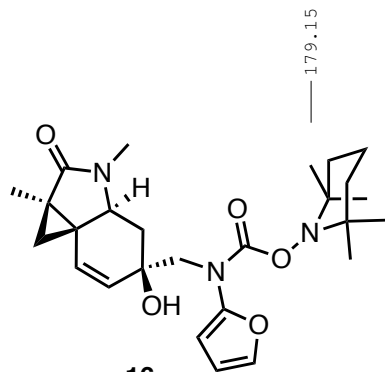

CDCl<sub>3</sub>, 100 MHz

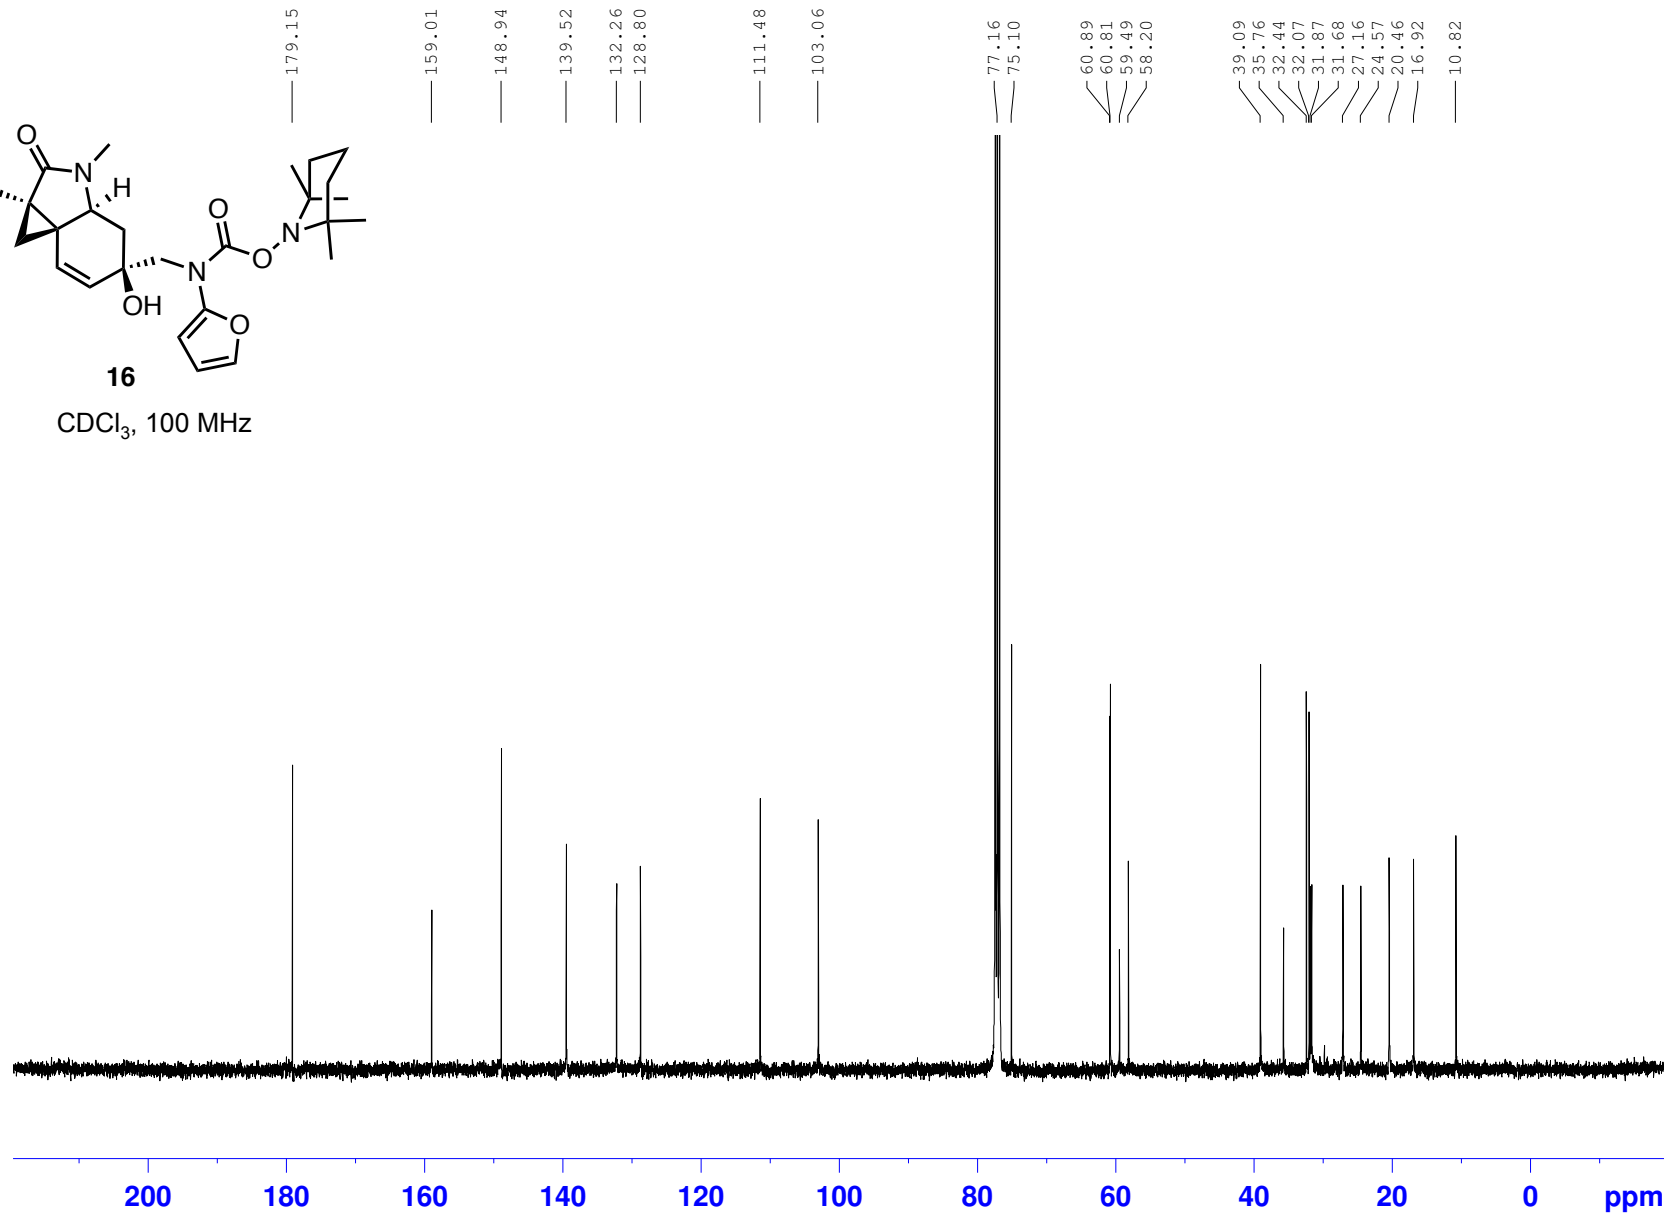



Figure 3. HSQC, 16 (CDCl<sub>3</sub>, 400 MHz)

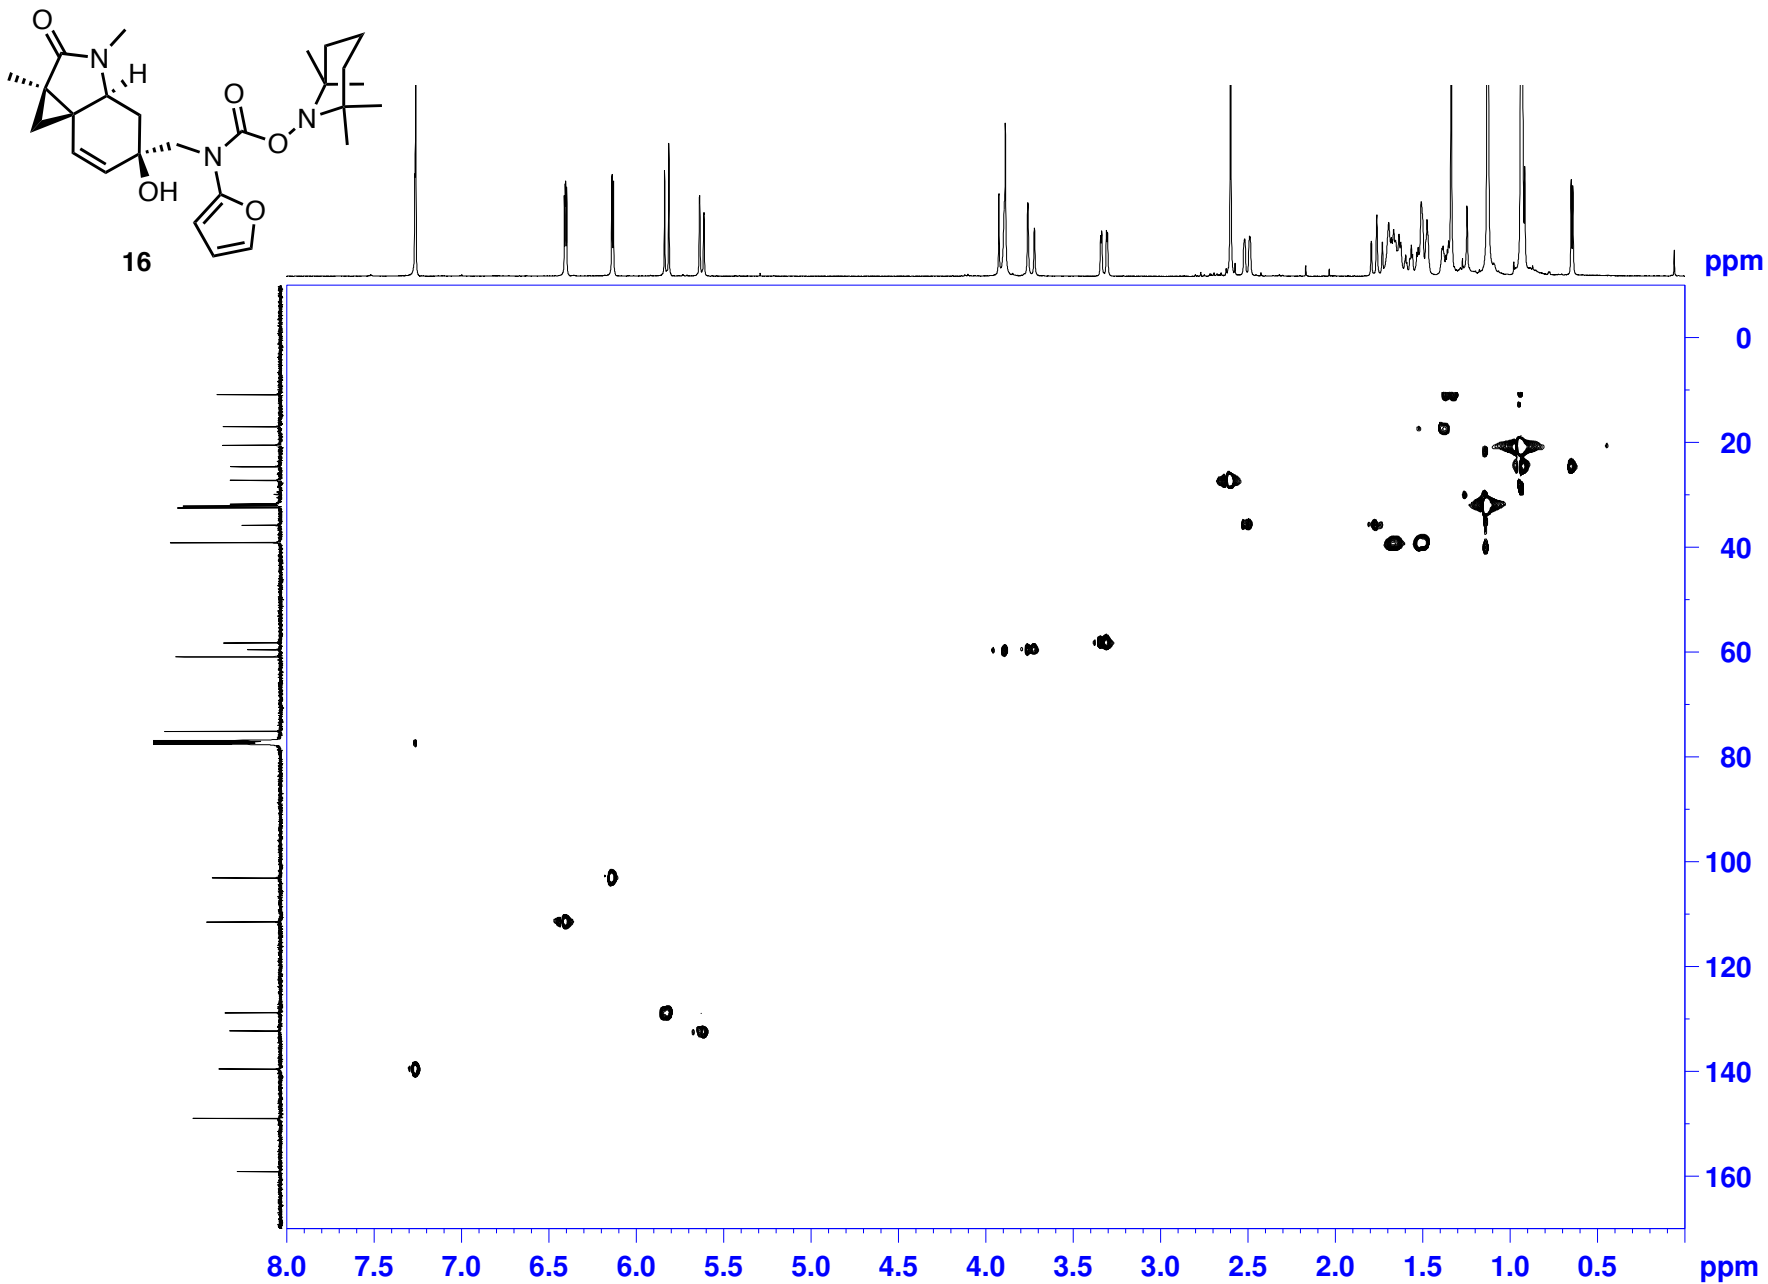

Figure 4. HSQC – magnified, **16** (CDCl<sub>3</sub>, 400 MHz)

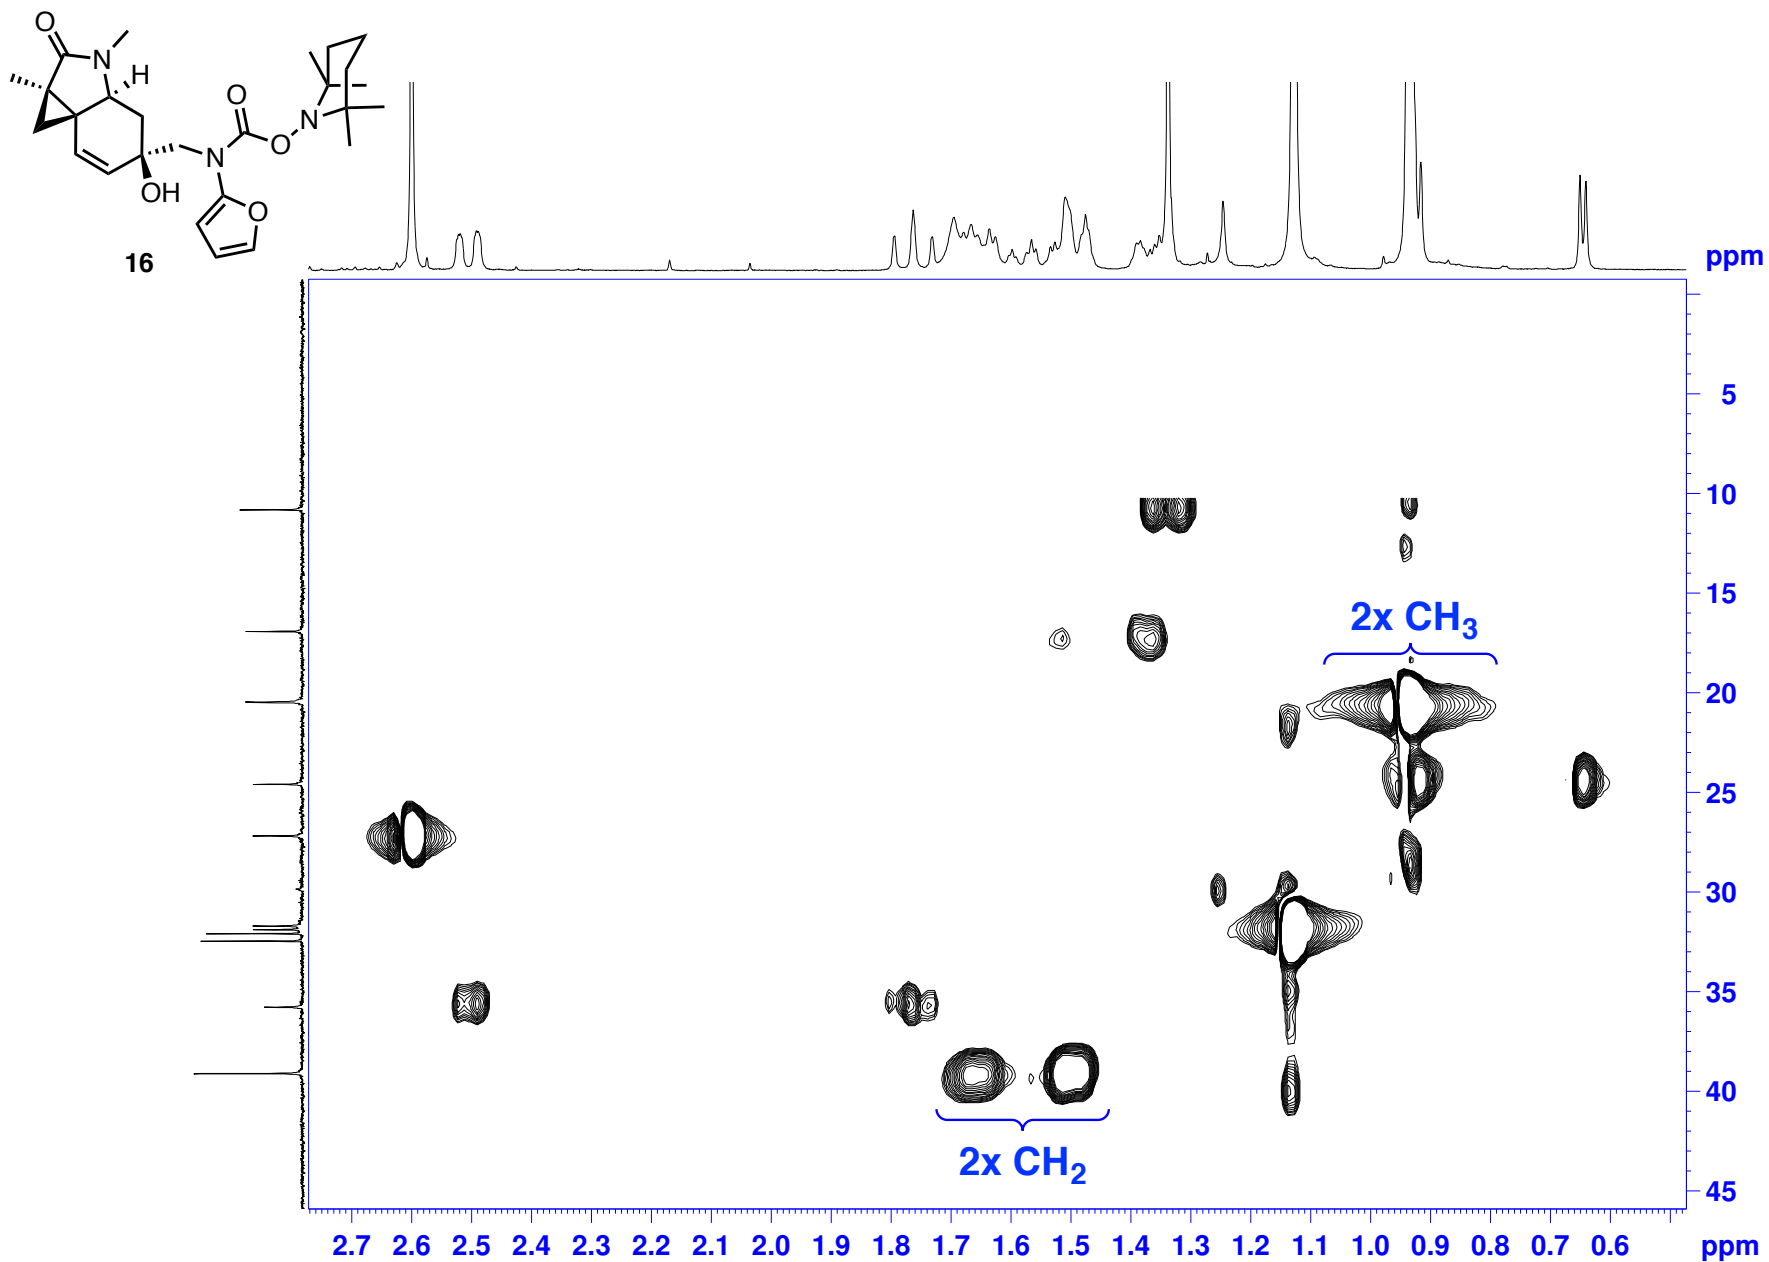

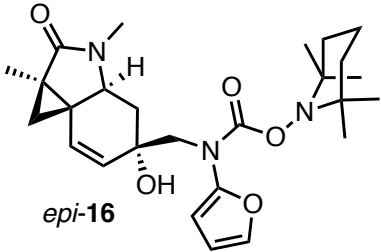

C<sub>6</sub>D<sub>6</sub>, 400 MHz

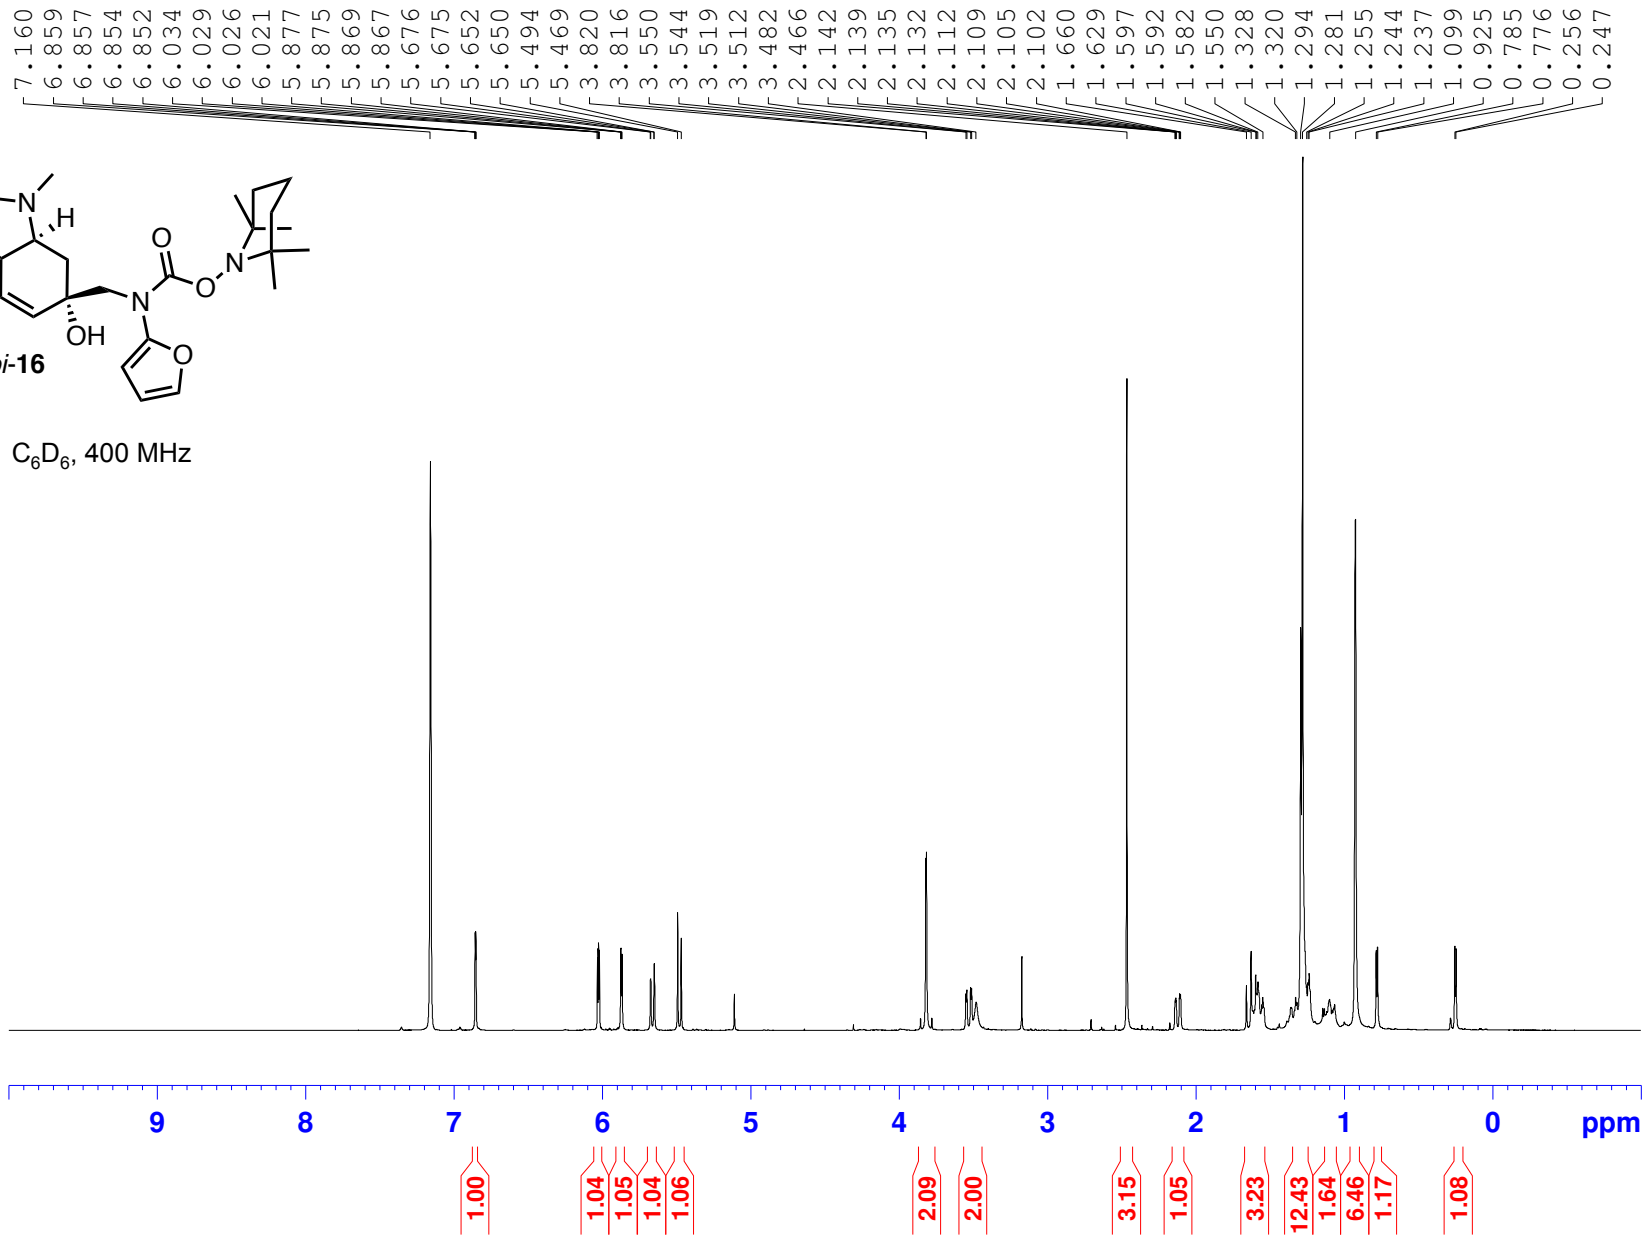

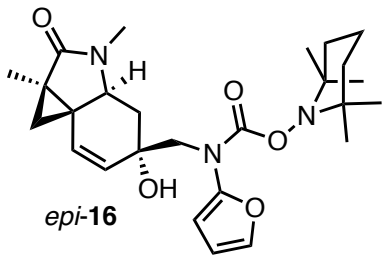

CDCl<sub>3</sub>, 600 MHz

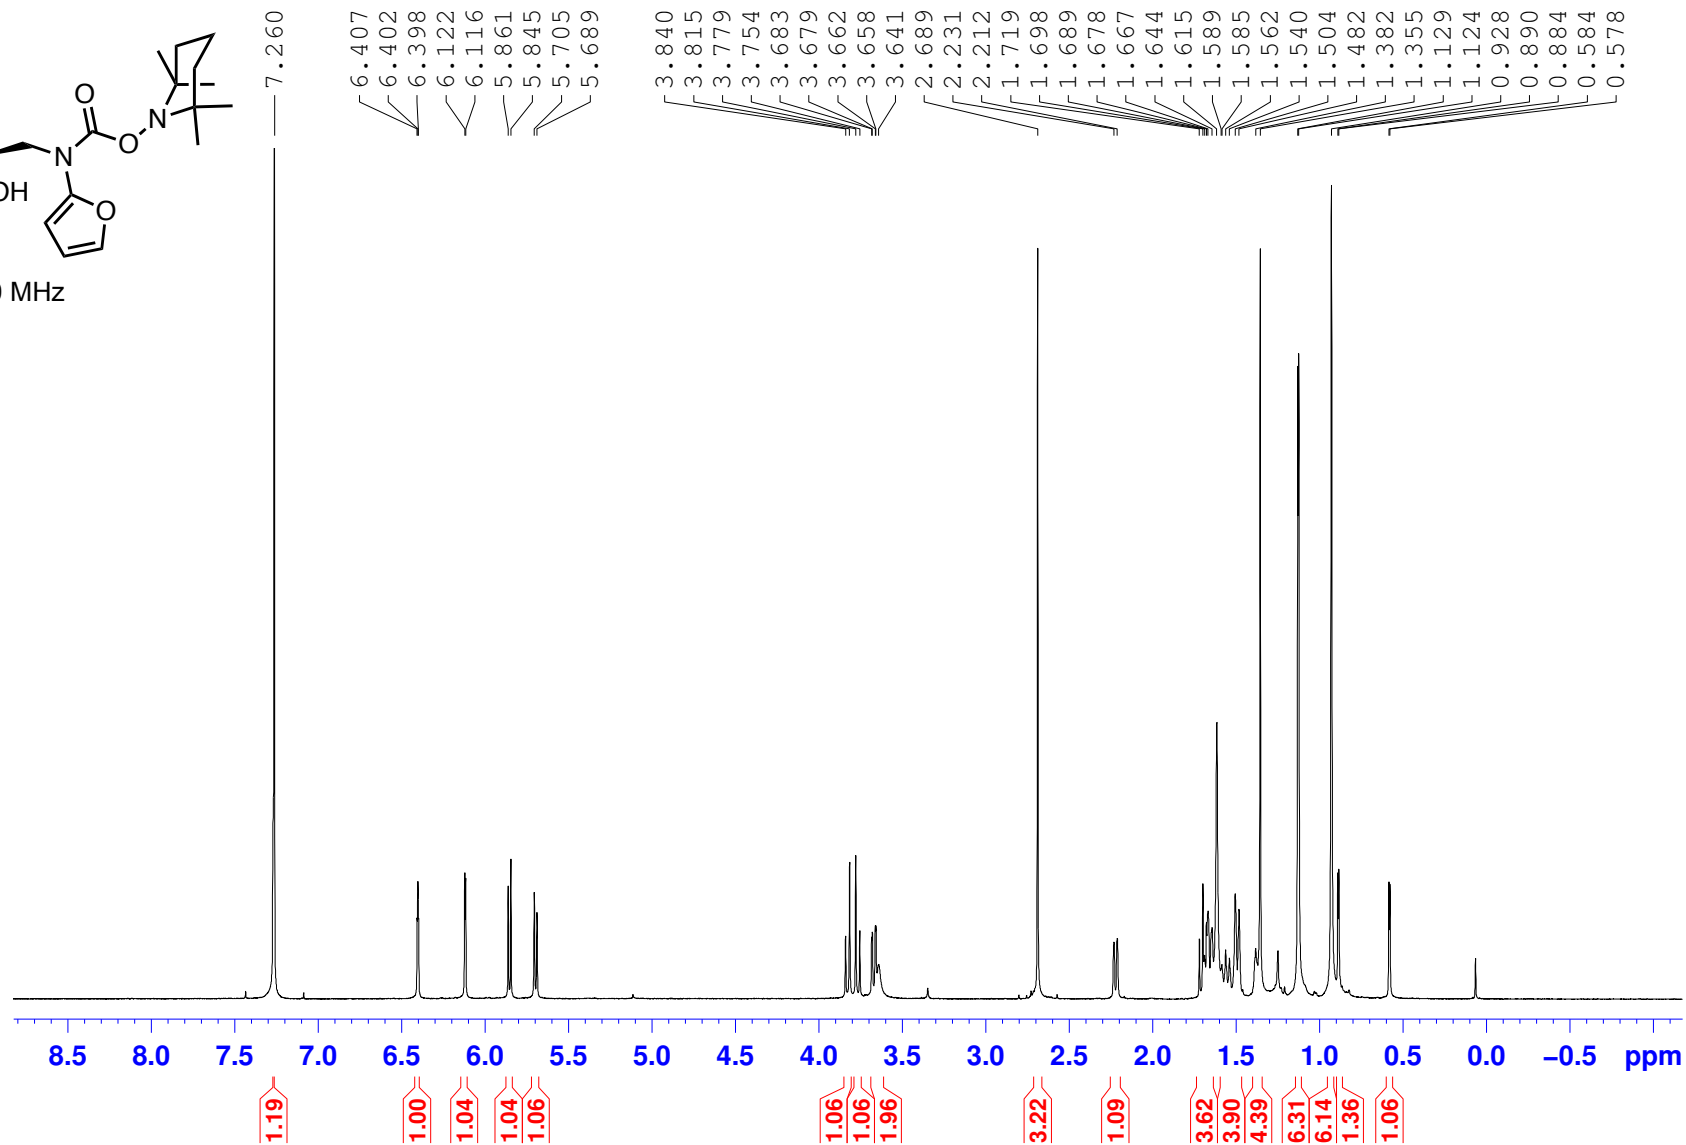

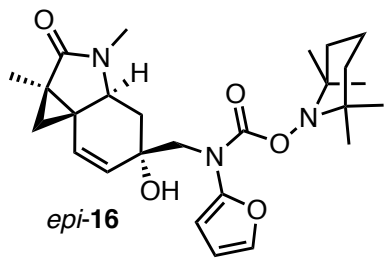

CDCl<sub>3</sub>, 150 MHz

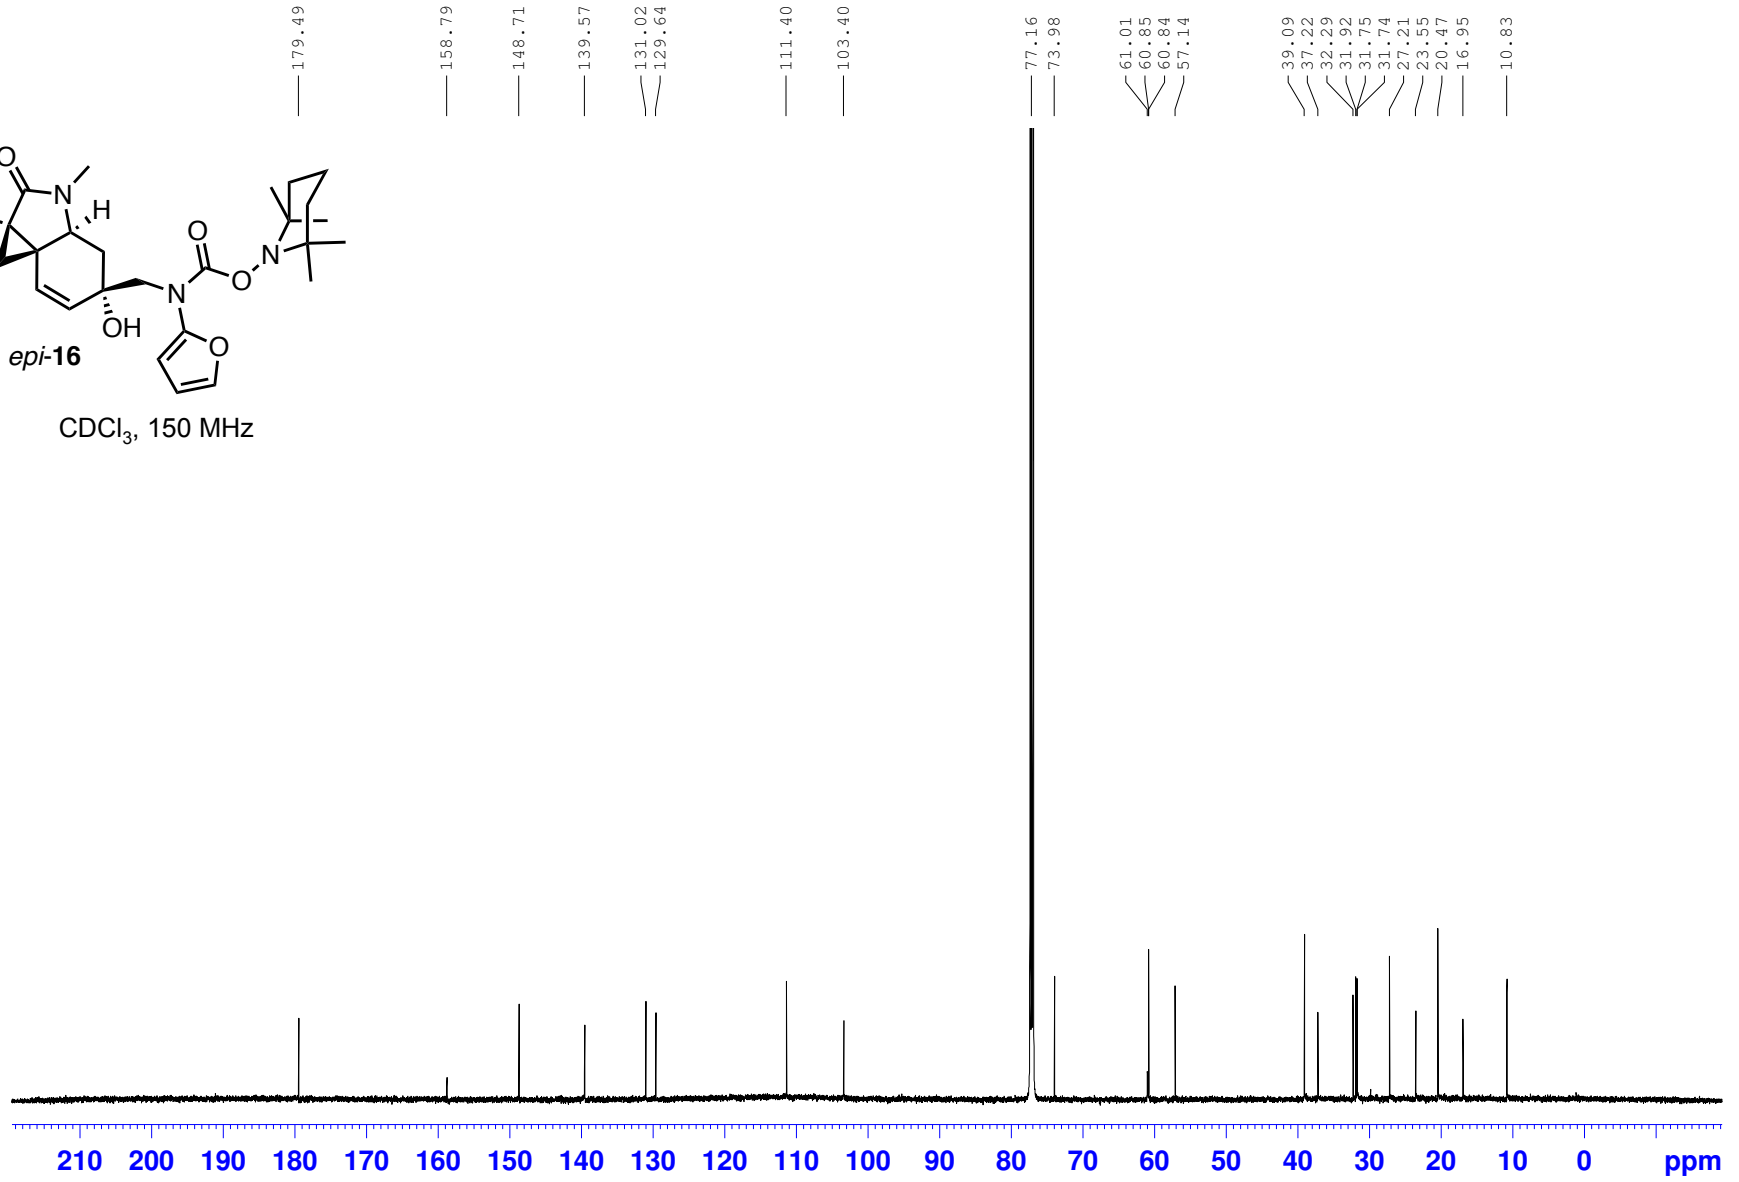

Figure 5. HSQC, *epi-16* (CDCl<sub>3</sub>, 600 MHz)

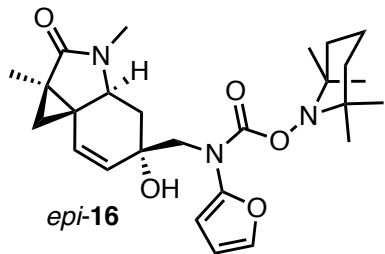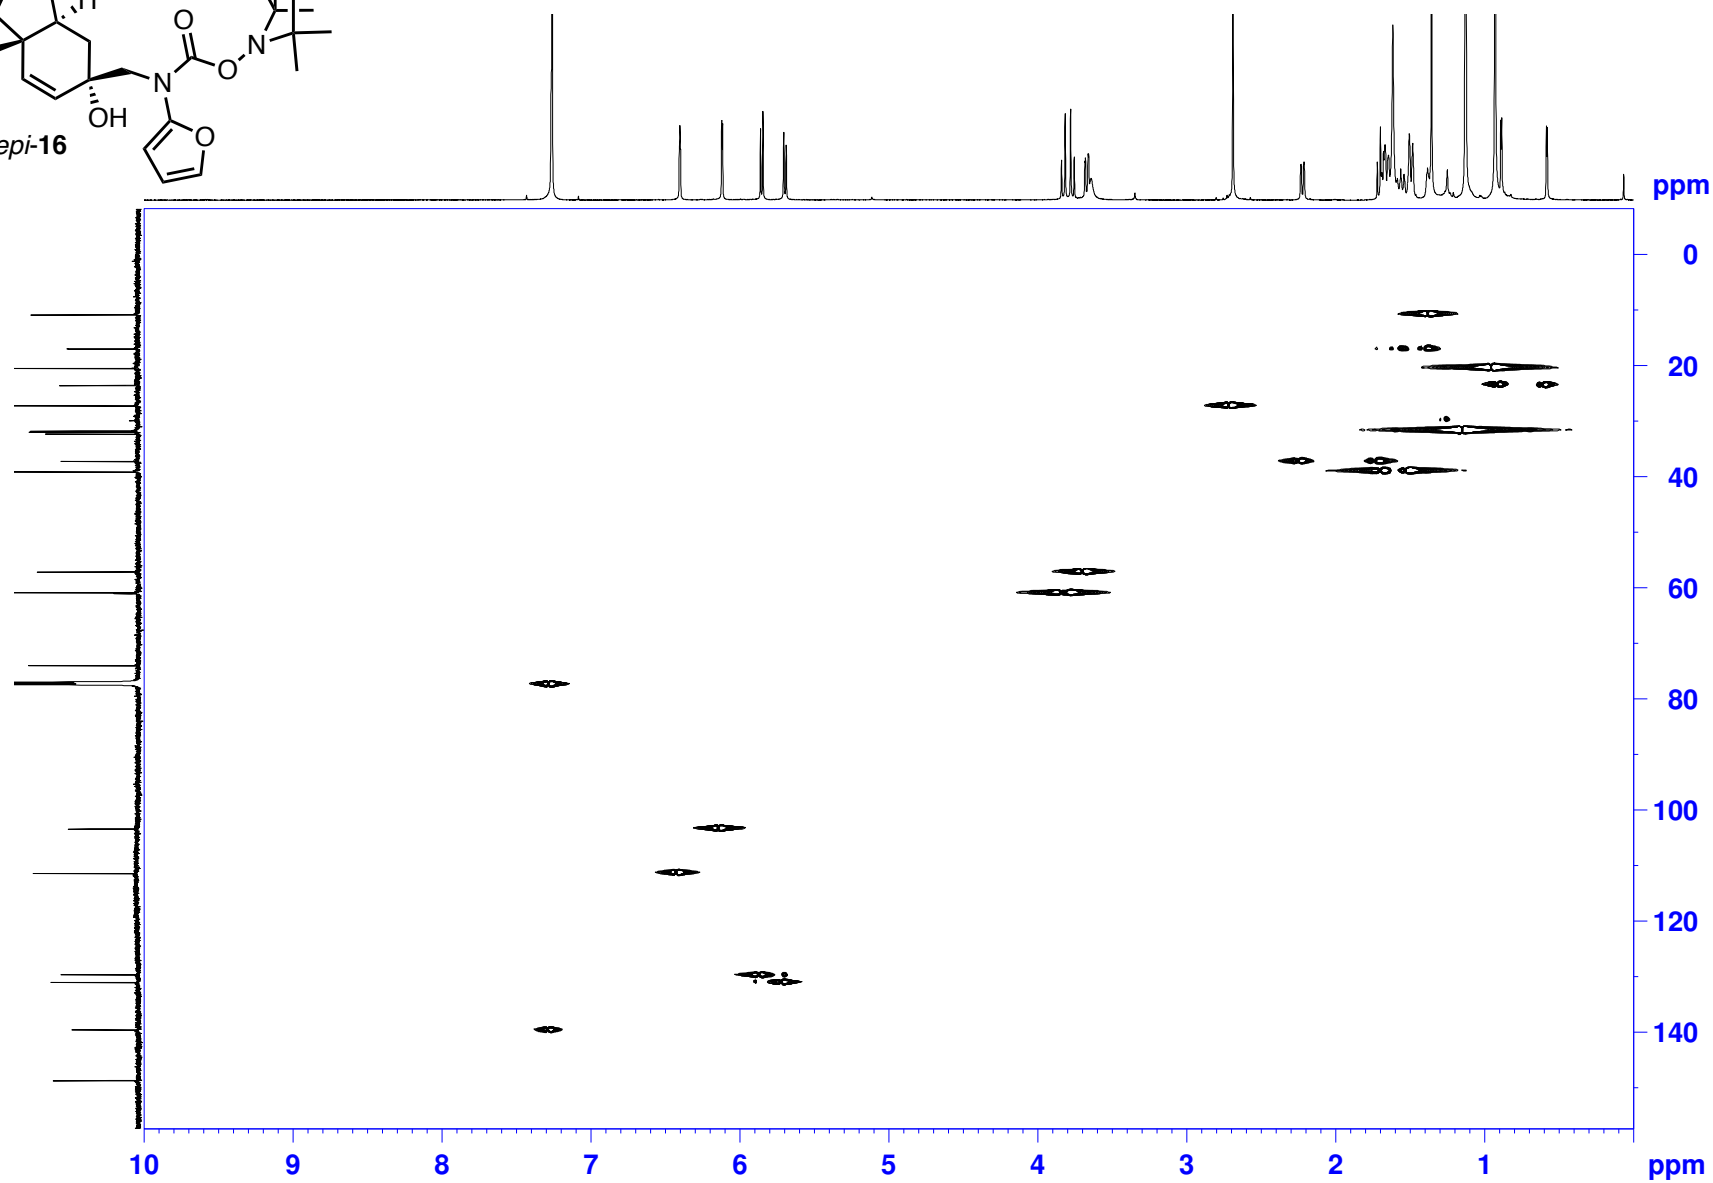

Figure 6. HSQC - magnified, *epi-16* (CDCl<sub>3</sub>, 600 MHz)

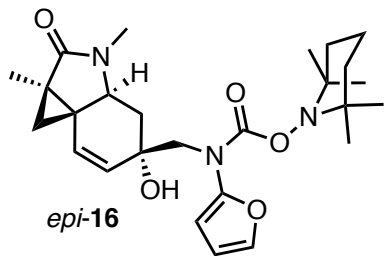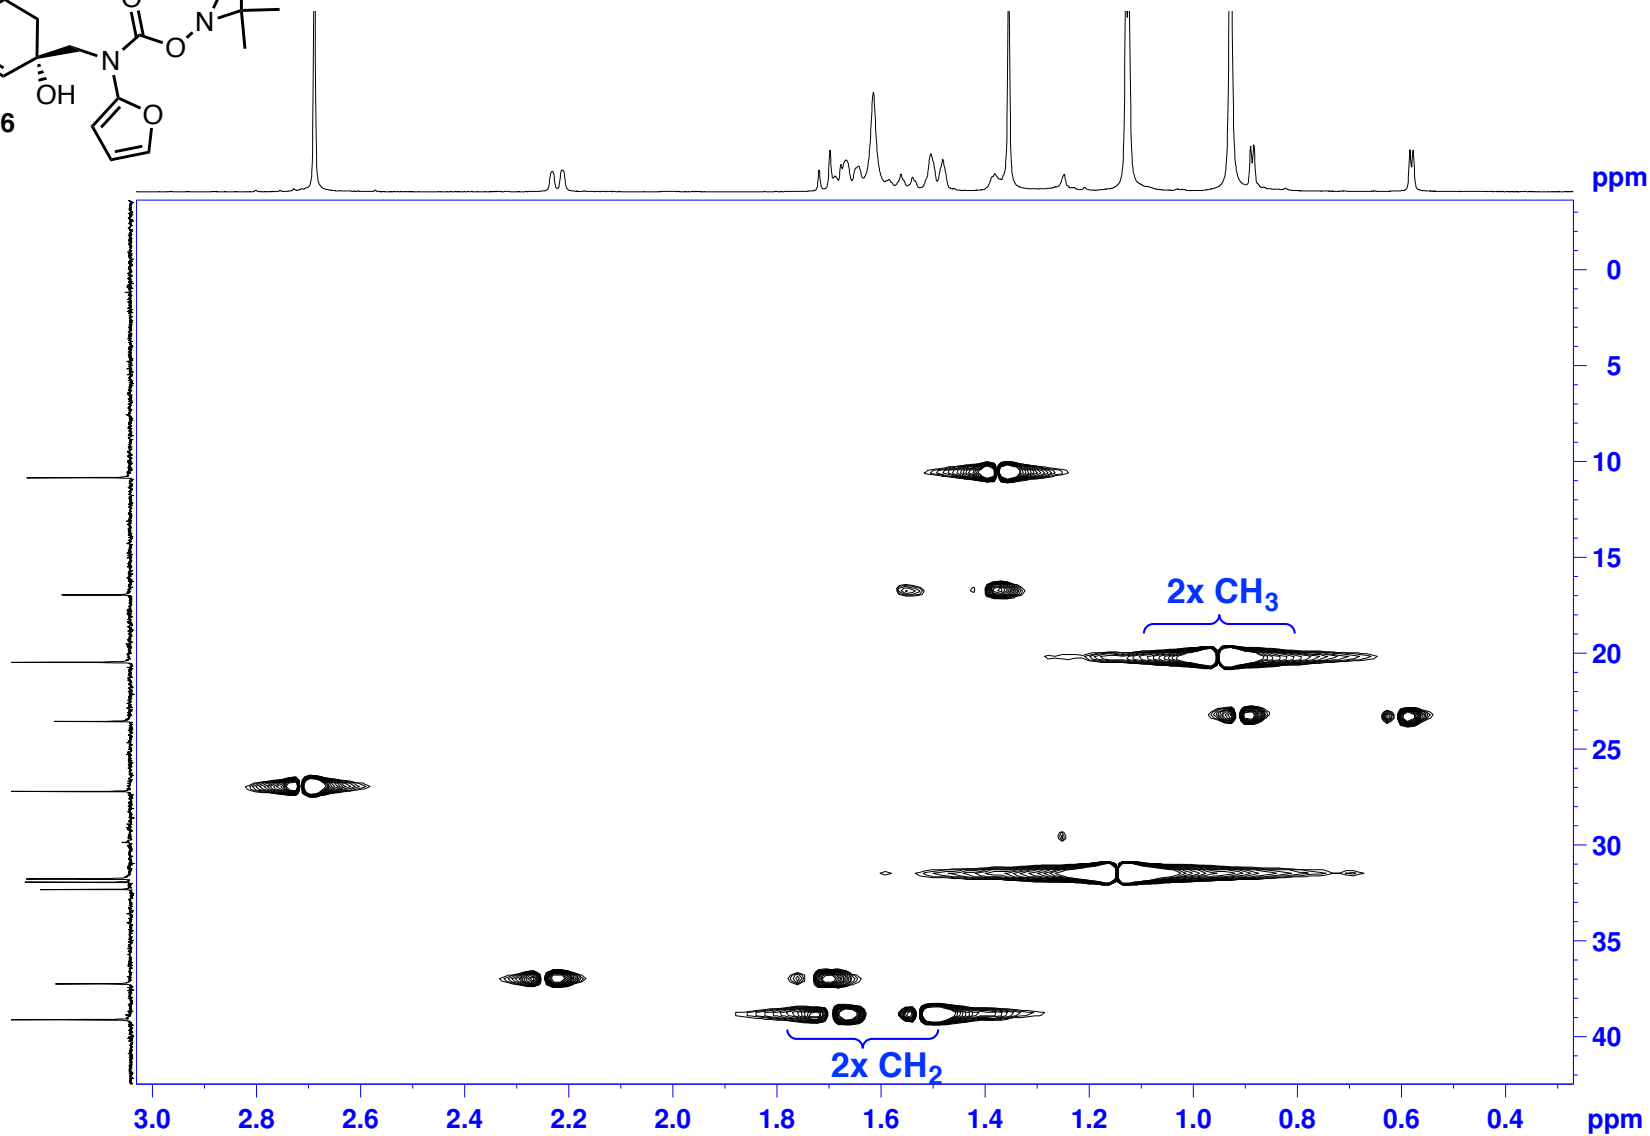

Figure 7. Key ROESY correlations in **16** (CDCl<sub>3</sub>, 500 MHz)

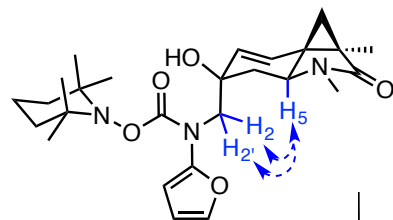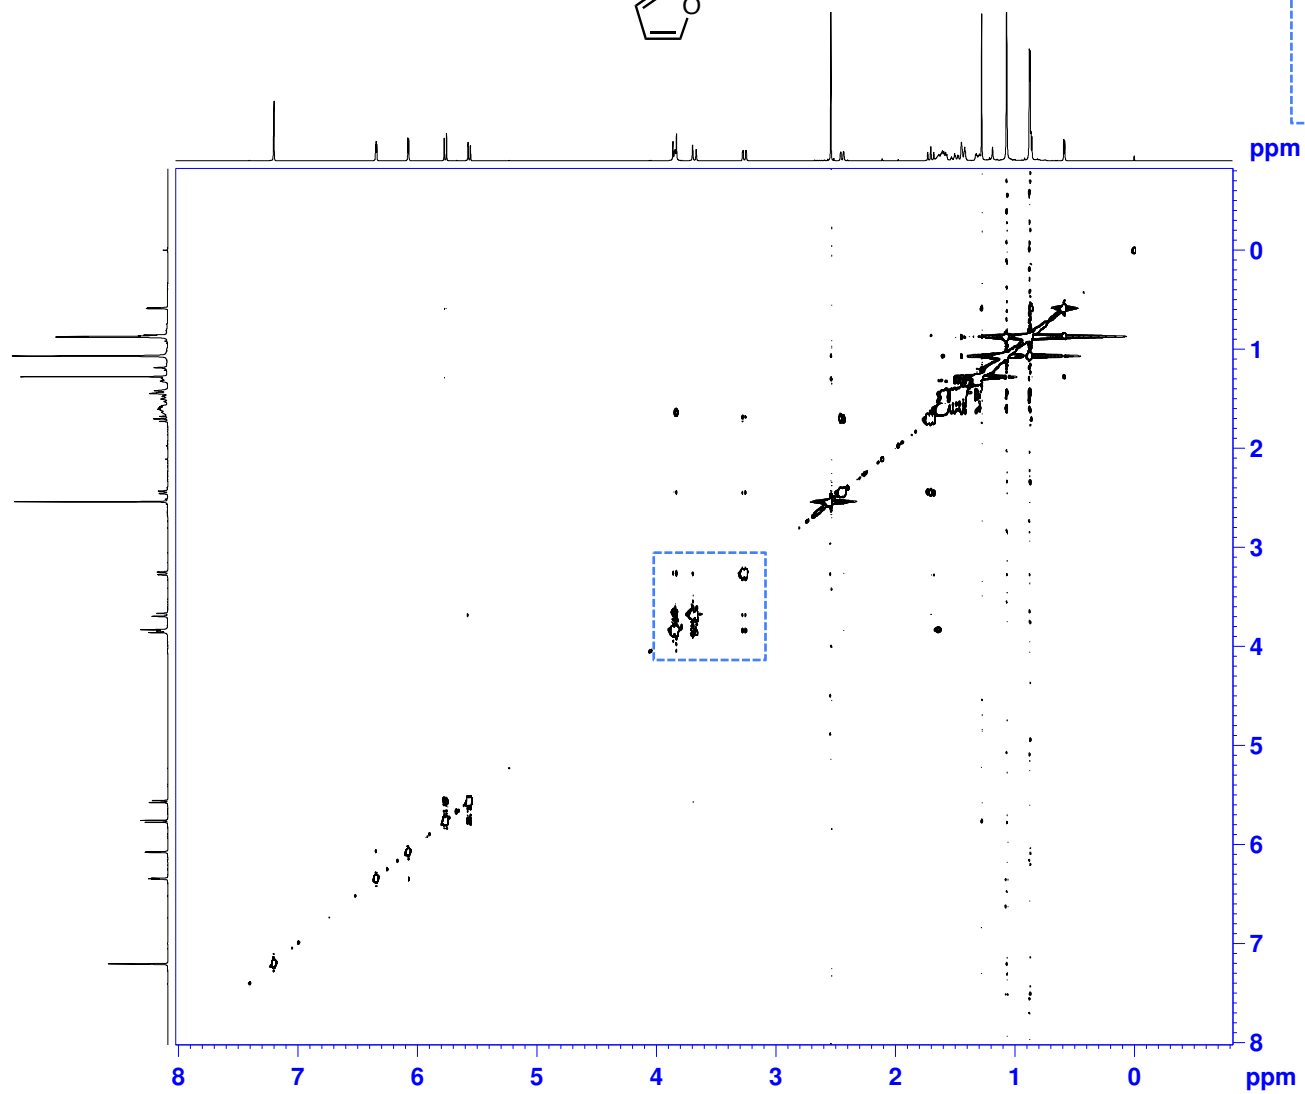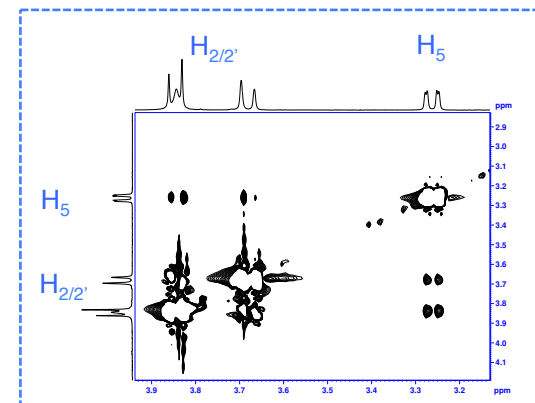



**Figure 8.** Lack of key ROESY correlations in *epi-16* (CDCl<sub>3</sub>, 600 MHz)

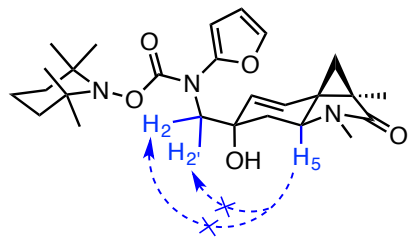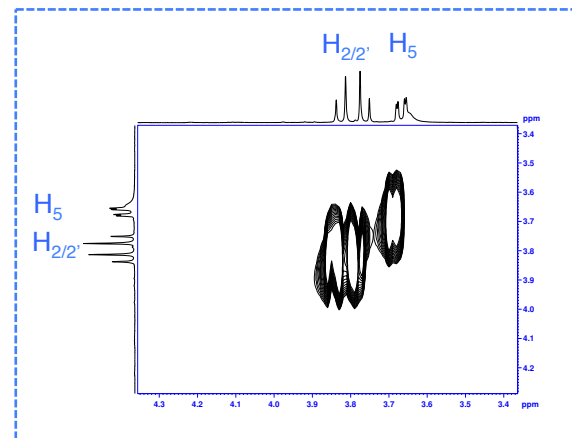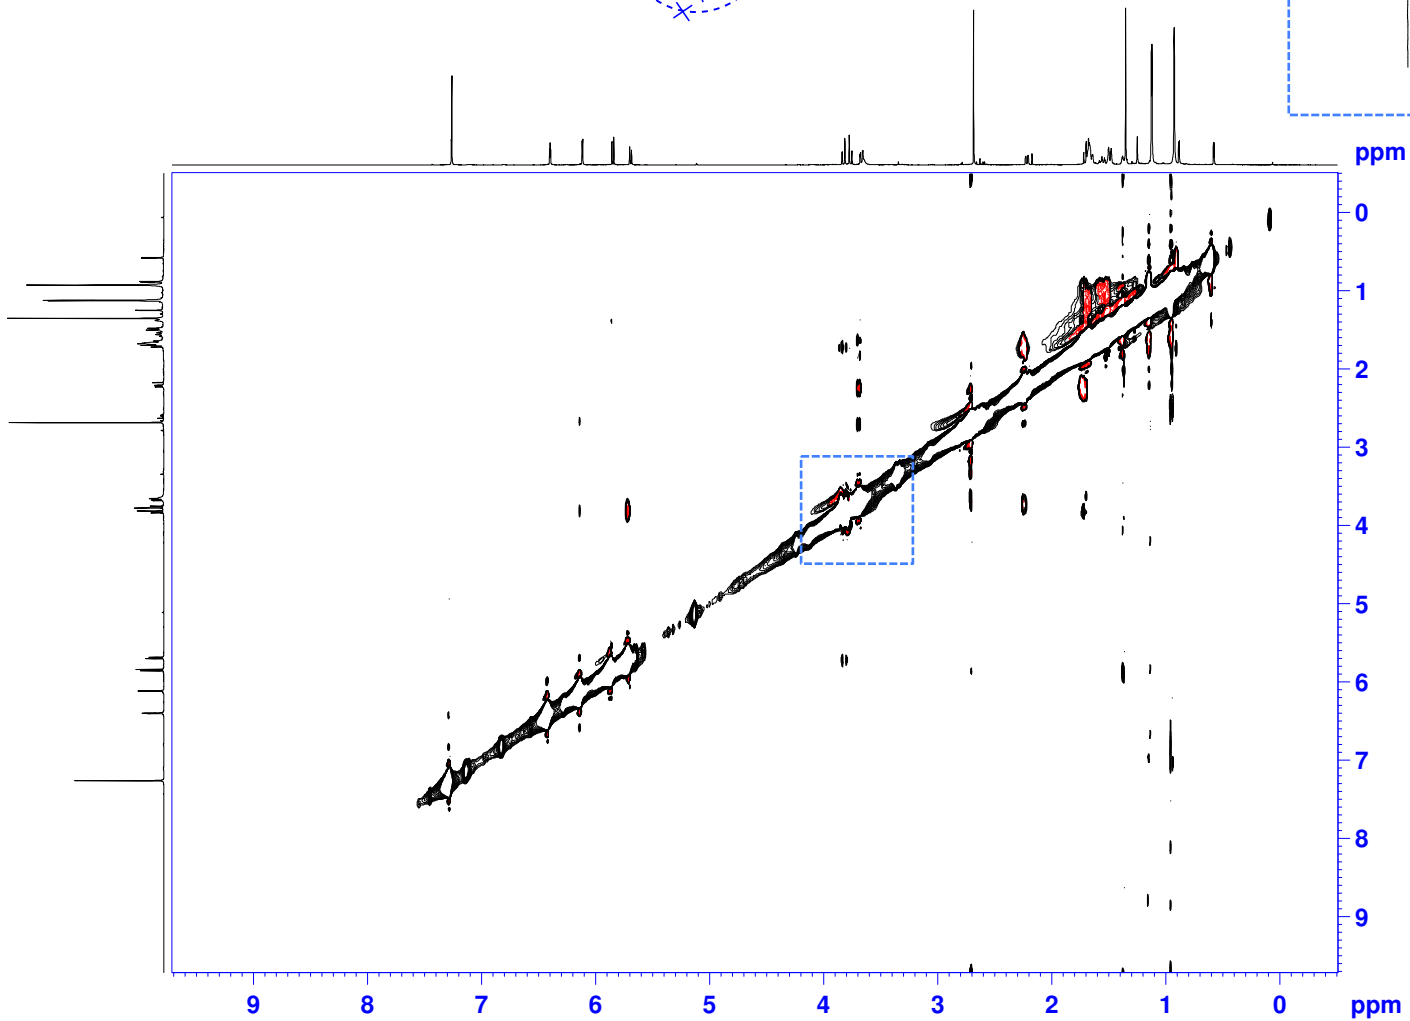

Figure 9. Key 1D-NOE correlations in **16** (CDCl<sub>3</sub>, 600 MHz)

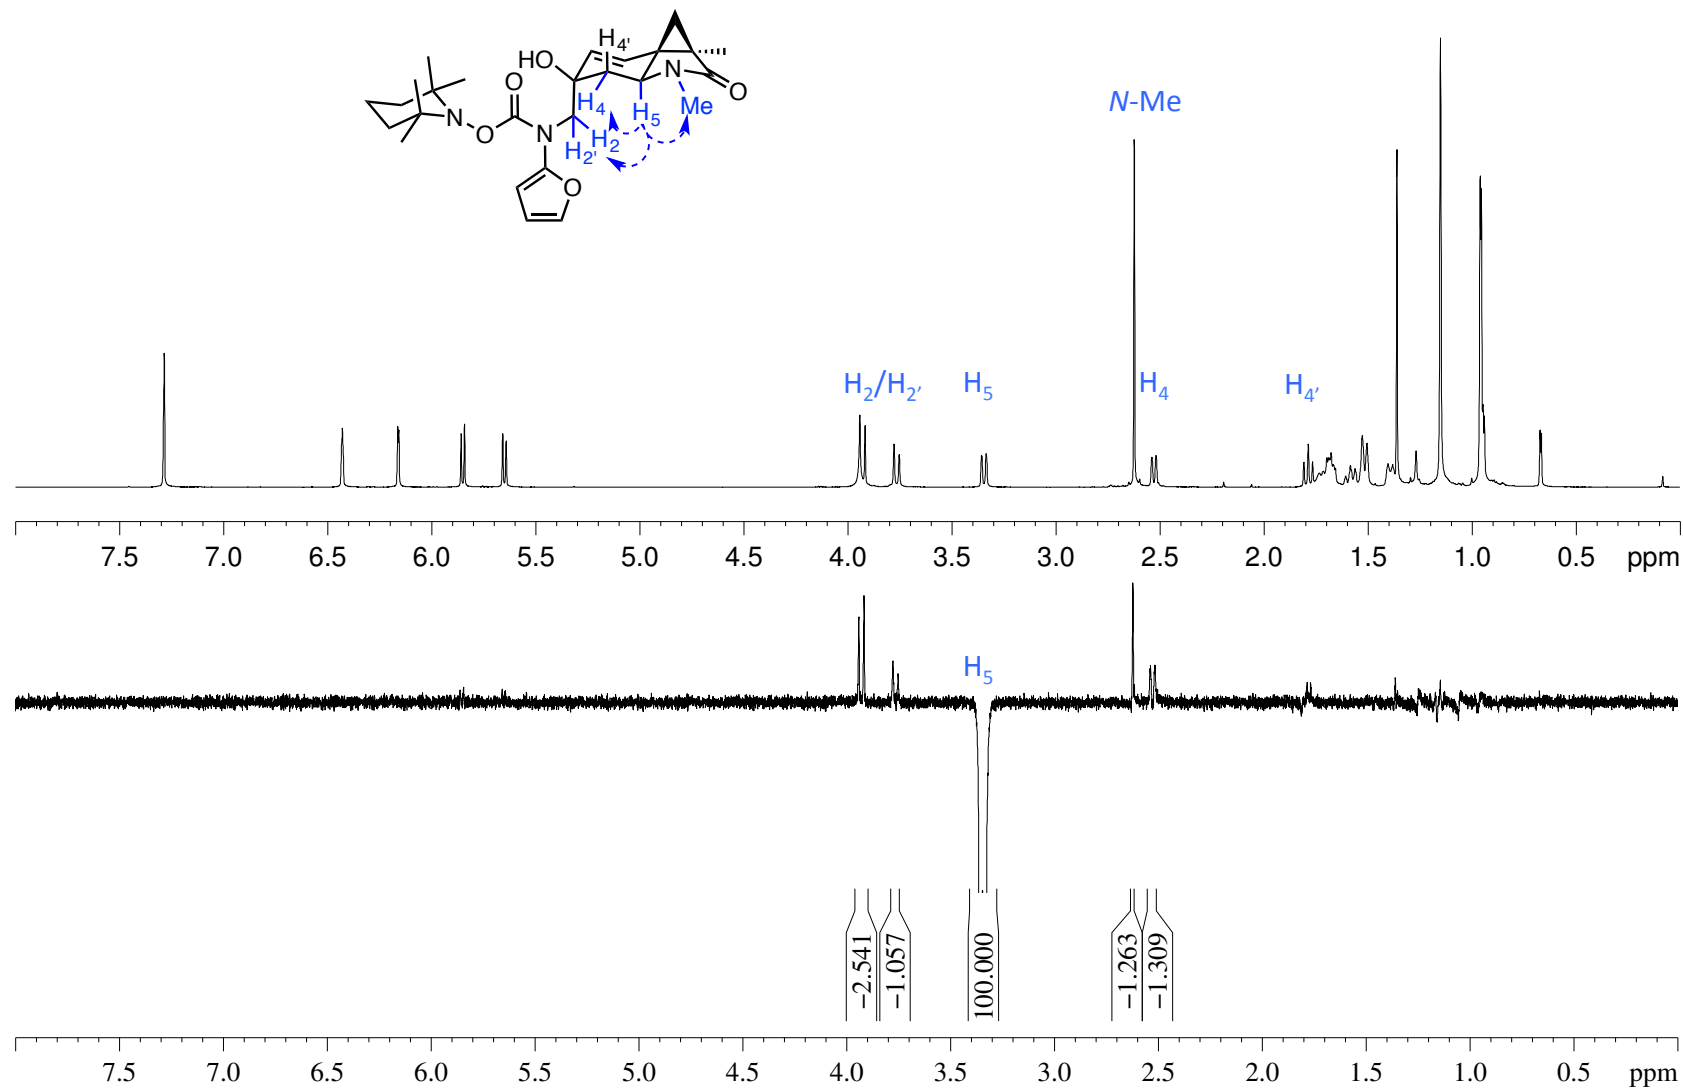

Figure 10. Key 1D-NOE correlations in *epi-16* (CDCl<sub>3</sub>, 600 MHz)

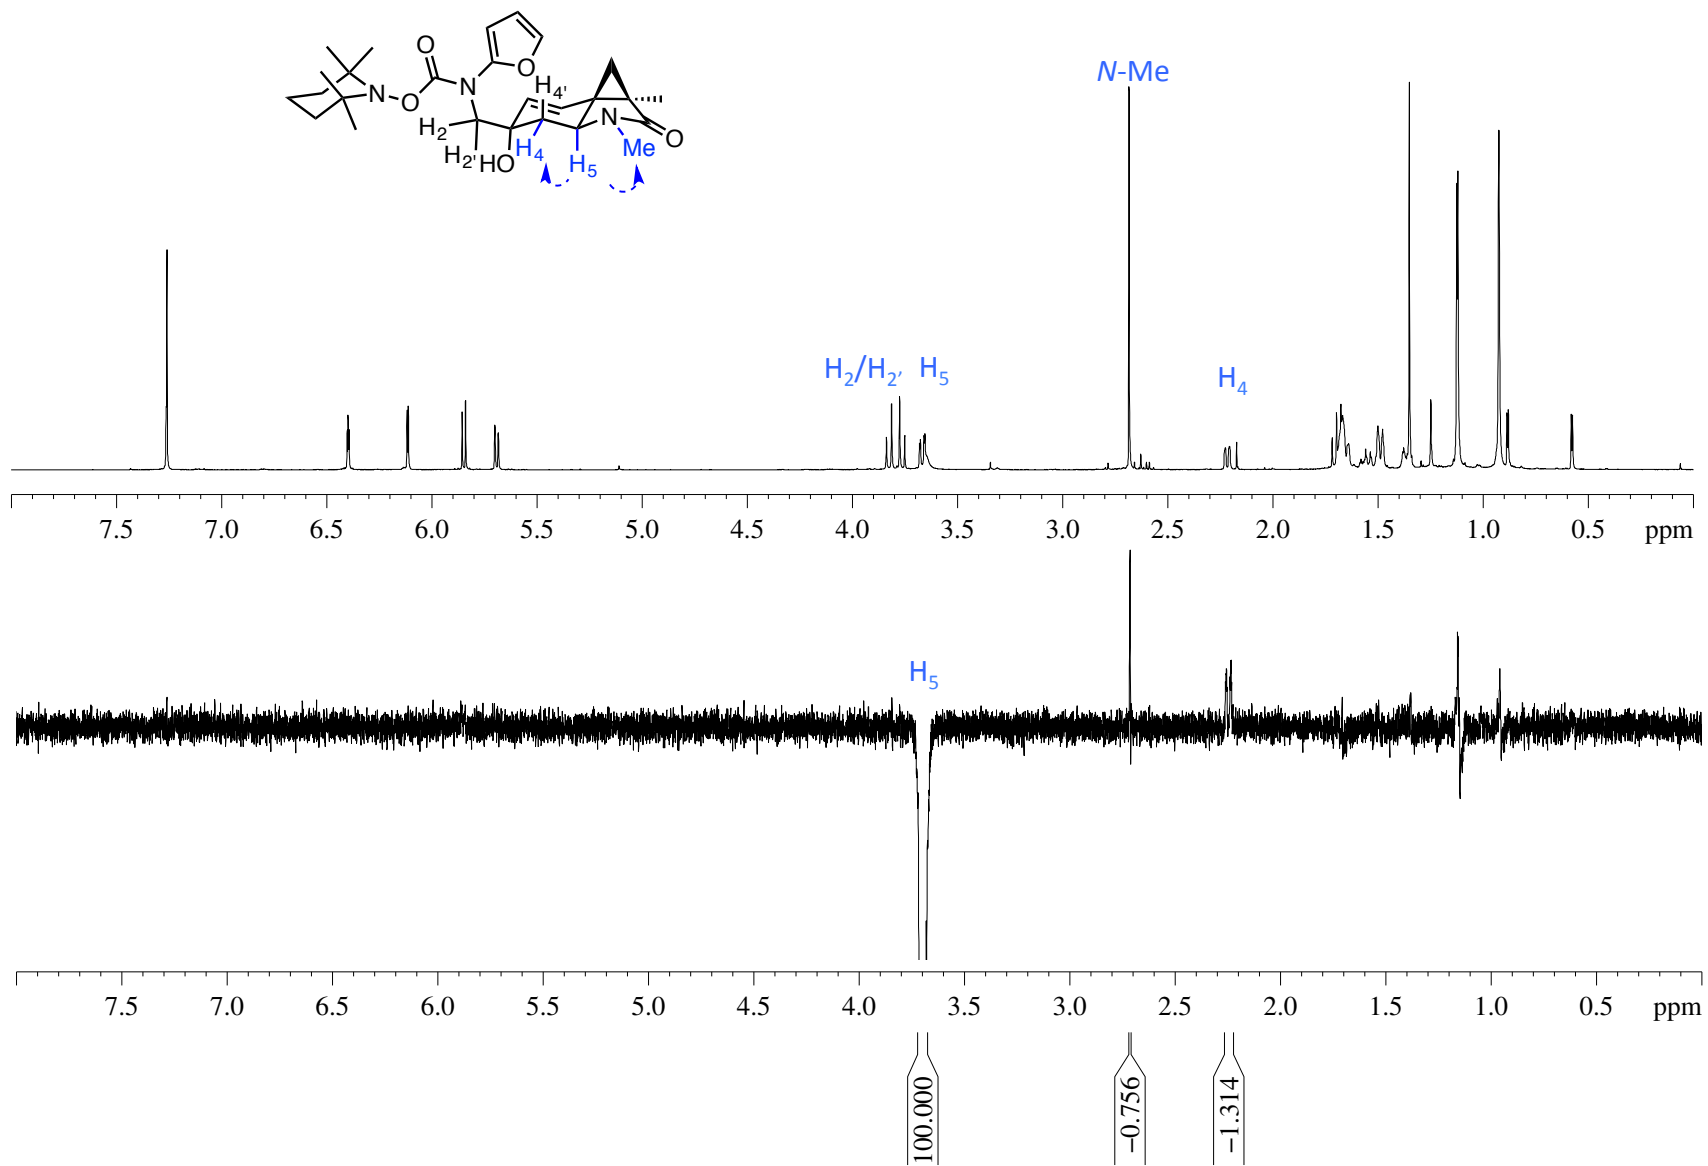

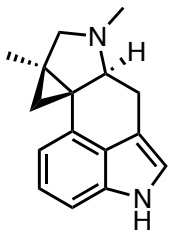

(-)-(1)

CDCl<sub>3</sub>, 400 MHz

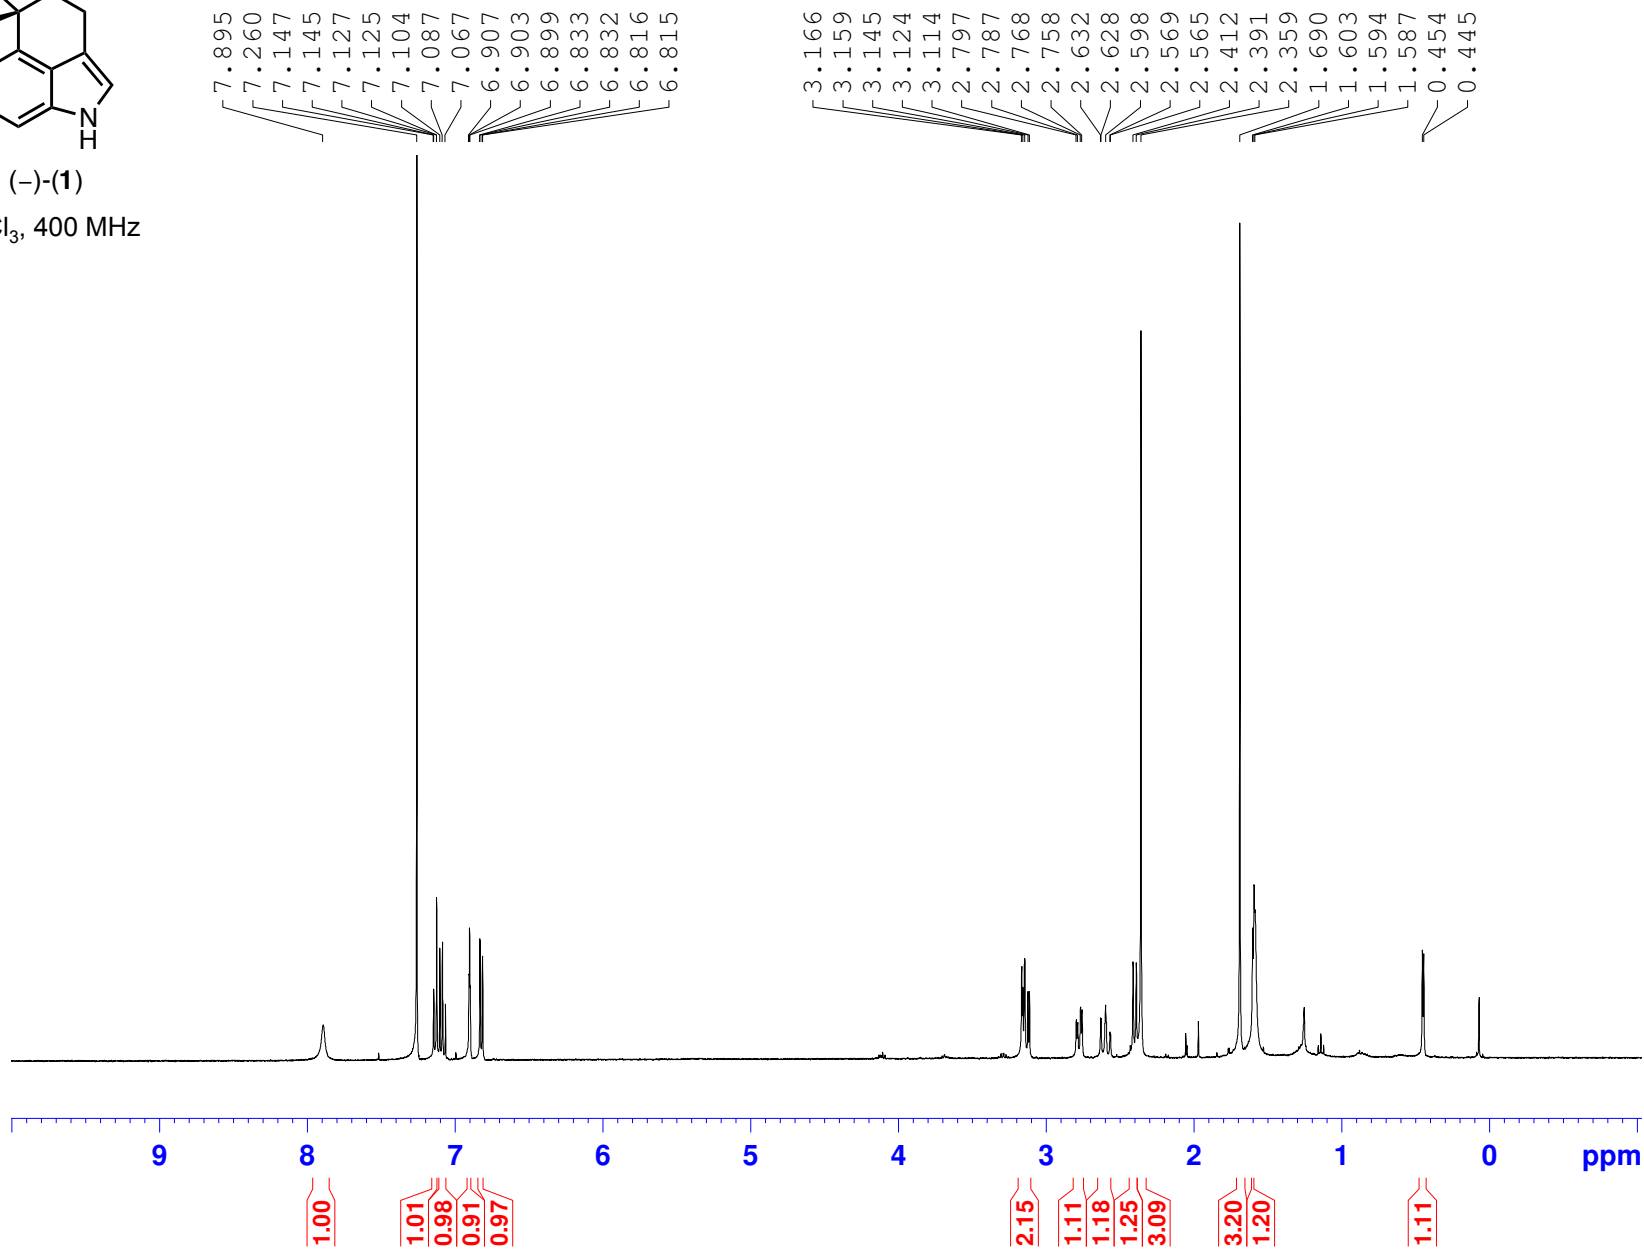

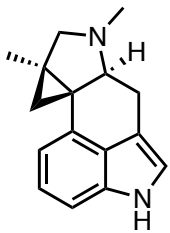

- 135.59
- 133.73
- 128.84
- 123.08
- 118.21
- 113.45
- 110.52
- 108.06
- 77.16
- 69.77
- 65.75
- 40.06
- 34.54
- 27.94
- 25.10
- 24.36
- 16.63

(-)-(1)  
CDCl<sub>3</sub>, 100 MHz

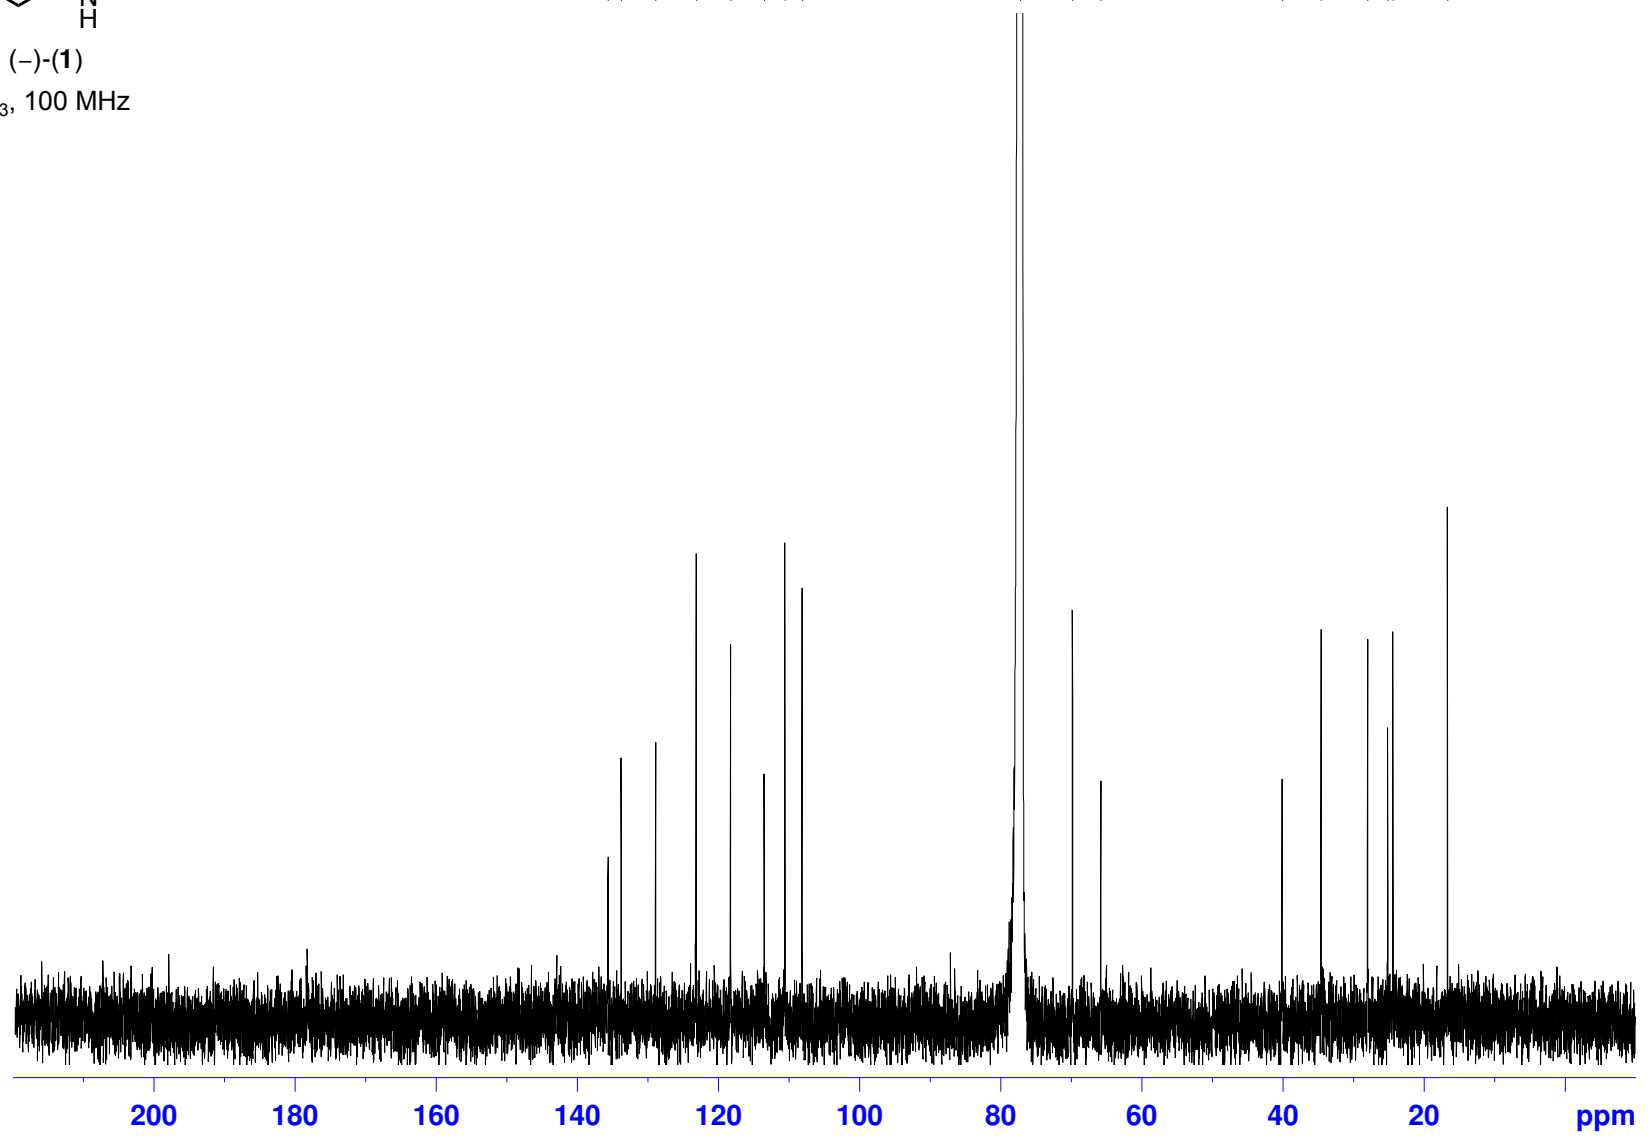

Supplement: NIHMS835904-supplement-Supporting_Information.pdf [file NIHMS835904-supplement-Supporting_Information.pdf]
